# Supplementary material for: Distinct role of subunits of the Arabidopsis RNA polymerase II elongation factor PAF1C in transcriptional reprogramming
Source: Front Plant Sci. 2022 Sep 29;13:974625. doi: 10.3389/fpls.2022.974625 (PMC9558118; doi:10.3389/fpls.2022.974625)
Supplement: Supplementary file 2 [file Table_1.xlsx]

## Sheet: Col0_DEGs_saltVSctrl
geneID	genotype	.abundant	baseMean	log2FoldChange	lfcSE	stat	pvalue	padj
AT5G52300	Col.0	TRUE	918.973	4.20843	0.142963	29.4373	1.83328e-190	3.19835e-186
AT5G06760	Col.0	TRUE	789.739	4.10388	0.215788	19.0182	1.20659e-80	1.61924e-77
AT5G48430	Col.0	TRUE	454.642	-4.09349	0.320112	-12.7877	1.92155e-37	5.98631e-35
AT3G17520	Col.0	TRUE	241.04	4.08968	0.424954	9.62382	6.34337e-22	7.32891e-20
AT5G50360	Col.0	TRUE	151.153	4.03845	0.297094	13.5932	4.39547e-42	1.7428e-39
AT2G47770	Col.0	TRUE	388.064	4.0186	0.291169	13.8016	2.49228e-43	1.01117e-40
AT1G52690	Col.0	TRUE	431.049	3.94798	0.173807	22.7147	3.2049e-114	1.11825e-110
AT5G03210	Col.0	TRUE	166.043	3.8081	0.270714	14.0669	6.06883e-45	2.71479e-42
AT3G48510	Col.0	TRUE	114.857	3.77517	0.310062	12.1755	4.1972e-34	1.00307e-31
AT3G02480	Col.0	TRUE	383.187	3.74411	0.201631	18.5691	5.71451e-77	5.86444e-74
AT5G59220	Col.0	TRUE	1778.69	3.73877	0.178108	20.9916	7.82786e-98	1.70706e-94
AT1G07430	Col.0	TRUE	376.785	3.66039	0.228426	16.0244	8.63002e-58	6.27331e-55
AT1G56600	Col.0	TRUE	132.553	3.62787	0.20661	17.5591	5.07041e-69	4.42292e-66
AT5G40800	Col.0	TRUE	116.09	3.62603	0.236984	15.3008	7.55387e-53	4.5443e-50
AT3G15670	Col.0	TRUE	86.6666	3.55615	0.292672	12.1506	5.69171e-34	1.34186e-31
AT3G03341	Col.0	TRUE	105.749	3.53002	0.289878	12.1776	4.09085e-34	9.91235e-32
AT1G60190	Col.0	TRUE	736.952	3.50658	0.161189	21.7545	6.269e-105	1.56241e-101
AT1G07900	Col.0	TRUE	66.1158	3.48538	0.304046	11.4633	2.01643e-30	3.86579e-28
AT5G13170	Col.0	TRUE	1283.71	3.40012	0.329457	10.3204	5.69957e-25	8.35585e-23
AT2G41190	Col.0	TRUE	1519.82	3.3131	0.263404	12.578	2.78912e-36	8.38948e-34
AT2G45570	Col.0	TRUE	75.967	3.29534	0.478051	6.89328	5.45204e-12	2.36608e-10
AT4G33905	Col.0	TRUE	72.6943	3.27482	0.308118	10.6285	2.19675e-26	3.45265e-24
AT5G59310	Col.0	TRUE	227.574	3.27381	0.356327	9.18764	4.01567e-20	3.93581e-18
AT5G40790	Col.0	TRUE	54.9079	3.26652	0.309958	10.5386	5.73438e-26	8.93232e-24
AT1G05100	Col.0	TRUE	190.981	3.2576	0.19987	16.2985	1.01078e-59	7.66701e-57
AT1G24580	Col.0	TRUE	121.154	3.21263	0.273972	11.7261	9.36712e-32	1.90022e-29
AT1G69260	Col.0	TRUE	573.684	3.1372	0.123119	25.481	3.20142e-143	1.86173e-139
AT1G52890	Col.0	TRUE	51.7599	3.09286	0.269885	11.4599	2.09748e-30	3.97746e-28
AT3G27250	Col.0	TRUE	946.571	3.06957	0.156358	19.6317	8.28526e-86	1.20454e-82
AT5G24080	Col.0	TRUE	238.175	3.05482	0.21093	14.4826	1.56047e-47	7.77826e-45
AT2G18480	Col.0	TRUE	62.6734	3.04952	0.436447	6.98714	2.80538e-12	1.29478e-10
AT2G47780	Col.0	TRUE	70.4087	3.04198	0.252599	12.0427	2.11806e-33	4.86207e-31
AT1G49450	Col.0	TRUE	345.155	3.02421	0.164283	18.4085	1.1224e-75	1.08785e-72
AT2G44460	Col.0	TRUE	34.6395	2.99531	0.376618	7.95317	1.81793e-15	1.22454e-13
AT4G27410	Col.0	TRUE	699.193	2.96383	0.143809	20.6095	2.25561e-94	4.37238e-91
AT2G37870	Col.0	TRUE	187.971	2.93969	0.235427	12.4866	8.82939e-36	2.5252e-33
AT2G33380	Col.0	TRUE	837.509	2.93733	0.266455	11.0237	2.93643e-28	5.02244e-26
AT3G28007	Col.0	TRUE	175.871	2.93496	0.373009	7.86832	3.59447e-15	2.33989e-13
AT3G63060	Col.0	TRUE	90.2319	2.91521	0.238337	12.2315	2.11073e-34	5.26055e-32
AT5G37300	Col.0	TRUE	58.6465	2.87468	0.402154	7.1482	8.79224e-13	4.24901e-11
AT1G07985	Col.0	TRUE	67.1836	2.85731	0.255274	11.1931	4.40575e-29	7.7639e-27
AT1G77120	Col.0	TRUE	276.524	2.85505	0.192115	14.8611	5.89195e-50	3.11488e-47
AT5G05390	Col.0	TRUE	149.812	2.82436	0.434409	6.50163	7.94568e-11	2.86999e-09
AT3G14440	Col.0	TRUE	1009.84	2.8007	0.150449	18.6157	2.39799e-77	2.61471e-74
AT4G01985	Col.0	TRUE	76.3777	2.76597	0.407196	6.79272	1.10037e-11	4.59261e-10
AT5G59320	Col.0	TRUE	549.076	2.76295	0.333392	8.28741	1.15743e-16	8.81769e-15
AT2G36780	Col.0	TRUE	59.5721	2.71706	0.394196	6.89267	5.47558e-12	2.3704e-10
AT5G02020	Col.0	TRUE	122.46	2.71333	0.264601	10.2544	1.13026e-24	1.62964e-22
AT5G66400	Col.0	TRUE	1192.68	2.71187	0.158296	17.1316	8.6182e-66	7.15967e-63
AT5G01520	Col.0	TRUE	392.438	2.70965	0.13702	19.7756	4.83275e-87	7.66474e-84
AT3G03470	Col.0	TRUE	334.952	2.65067	0.384294	6.89751	5.29205e-12	2.30237e-10
AT4G21440	Col.0	TRUE	42.5695	2.61131	0.334465	7.80744	5.8362e-15	3.68907e-13
AT3G55090	Col.0	TRUE	184.154	2.60565	0.166183	15.6794	2.09305e-55	1.40443e-52
AT3G61890	Col.0	TRUE	250.236	2.60374	0.233246	11.1631	6.18231e-29	1.07857e-26
AT1G69480	Col.0	TRUE	224.138	2.5821	0.208409	12.3896	2.9769e-35	7.86893e-33
AT2G19900	Col.0	TRUE	116.655	2.56291	0.276773	9.25997	2.04482e-20	2.06208e-18
AT5G06090	Col.0	TRUE	163.454	2.55489	0.349033	7.3199	2.48149e-13	1.26585e-11
AT1G05340	Col.0	TRUE	93.4499	2.53678	0.203009	12.4959	7.86249e-36	2.28615e-33
AT1G69490	Col.0	TRUE	37.3954	2.5299	0.335871	7.53236	4.98329e-14	2.83187e-12
AT5G02760	Col.0	TRUE	103.847	-2.52151	0.305234	-8.26093	1.4454e-16	1.08692e-14
AT2G46680	Col.0	TRUE	521.753	2.50844	0.137772	18.2071	4.53412e-74	4.16328e-71
AT4G02280	Col.0	TRUE	480.997	2.47669	0.172003	14.3991	5.24143e-47	2.54005e-44
AT1G30840	Col.0	TRUE	47.9303	-2.47327	0.406519	-6.08403	1.172e-09	3.6841e-08
AT5G11110	Col.0	TRUE	1015.73	2.46121	0.0924241	26.6295	3.09454e-156	2.69937e-152
AT1G27020	Col.0	TRUE	45.7615	-2.455	0.295223	-8.31573	9.11865e-17	7.0081e-15
AT3G13672	Col.0	TRUE	32.6645	2.4318	0.307188	7.91632	2.44635e-15	1.62277e-13
AT1G04220	Col.0	TRUE	383.71	2.40916	0.28448	8.46864	2.48272e-17	2.00526e-15
AT2G39800	Col.0	TRUE	9079.2	2.40786	0.106589	22.5902	5.41498e-113	1.5745e-109
AT1G04247	Col.0	TRUE	100.665	2.40498	0.207857	11.5704	5.82423e-31	1.14168e-28
AT1G60470	Col.0	TRUE	45.3206	2.39435	0.276457	8.66083	4.68334e-18	3.96629e-16
AT5G65730	Col.0	TRUE	259.317	-2.36842	0.236301	-10.0229	1.20925e-23	1.64816e-21
AT1G16850	Col.0	TRUE	344.056	2.3462	0.248653	9.43563	3.88635e-21	4.23758e-19
AT3G05640	Col.0	TRUE	621.386	2.338	0.155745	15.0117	6.15586e-51	3.46436e-48
AT5G23020	Col.0	TRUE	119.42	-2.33406	0.218063	-10.7036	9.78775e-27	1.58108e-24
AT1G16390	Col.0	TRUE	100.504	-2.32852	0.233475	-9.97333	1.99421e-23	2.61586e-21
AT1G66830	Col.0	TRUE	29.043	2.31951	0.472633	4.90765	9.2176e-07	1.62928e-05
AT2G28400	Col.0	TRUE	179.663	2.31594	0.198462	11.6694	1.826e-31	3.66166e-29
AT3G15500	Col.0	TRUE	40.6918	2.29471	0.284498	8.06583	7.27415e-16	5.15873e-14
AT5G17460	Col.0	TRUE	413.612	2.28179	0.241141	9.46246	3.00781e-21	3.30027e-19
AT1G72760	Col.0	TRUE	23.2313	2.27179	0.374317	6.06915	1.28588e-09	4.00597e-08
AT2G38310	Col.0	TRUE	637.477	-2.25852	0.113978	-19.8153	2.19734e-87	3.83348e-84
AT3G55500	Col.0	TRUE	1070.62	2.23228	0.348542	6.40461	1.50753e-10	5.26008e-09
AT2G34610	Col.0	TRUE	46.3083	2.21956	0.318836	6.96145	3.36792e-12	1.51046e-10
AT4G30470	Col.0	TRUE	761.165	2.20694	0.171677	12.8552	8.04166e-38	2.59805e-35
AT5G57050	Col.0	TRUE	612.415	2.20366	0.156824	14.0518	7.51104e-45	3.27594e-42
AT1G80110	Col.0	TRUE	118.927	2.20291	0.190047	11.5914	4.55561e-31	9.0315e-29
AT5G18130	Col.0	TRUE	181.841	2.20284	0.146071	15.0806	2.17233e-51	1.26328e-48
AT1G73390	Col.0	TRUE	791.804	2.19596	0.131741	16.6687	2.21201e-62	1.75413e-59
AT2G36270	Col.0	TRUE	43.7643	2.19428	0.280223	7.8305	4.8592e-15	3.10526e-13
AT3G29575	Col.0	TRUE	533.346	2.1901	0.154618	14.1646	1.51739e-45	6.9664e-43
AT3G08860	Col.0	TRUE	171.925	2.18784	0.179082	12.217	2.52346e-34	6.2006e-32
AT4G26080	Col.0	TRUE	2364.53	2.18767	0.115633	18.9191	7.93587e-80	9.88923e-77
AT3G11410	Col.0	TRUE	2077.04	2.18039	0.137311	15.8793	8.82215e-57	6.15645e-54
AT1G53470	Col.0	TRUE	699.413	2.17934	0.219479	9.92963	3.09401e-23	3.96898e-21
AT5G28510	Col.0	TRUE	260.794	2.17767	0.384239	5.66747	1.44918e-08	3.71799e-07
AT1G62570	Col.0	TRUE	2285.11	2.1688	0.173956	12.4675	1.12242e-35	3.15834e-33
AT4G10960	Col.0	TRUE	132.097	2.16388	0.191815	11.2811	1.62745e-29	2.95755e-27
AT1G71910	Col.0	TRUE	30.5698	2.15418	0.293788	7.33243	2.2602e-13	1.15975e-11
AT1G23200	Col.0	TRUE	191.737	2.15289	0.272346	7.90499	2.67956e-15	1.77075e-13
AT5G24230	Col.0	TRUE	35.3443	-2.15135	0.269537	-7.98165	1.44385e-15	9.91709e-14
AT2G30010	Col.0	TRUE	136.434	-2.14061	0.216679	-9.87918	5.12519e-23	6.34143e-21
AT3G62590	Col.0	TRUE	165.185	2.13442	0.218766	9.75667	1.72739e-22	2.06411e-20
AT1G54100	Col.0	TRUE	2021.37	2.13337	0.13738	15.529	2.20736e-54	1.42628e-51
AT3G15990	Col.0	TRUE	218.014	2.13086	0.292197	7.29253	3.04177e-13	1.52491e-11
AT1G21400	Col.0	TRUE	392.145	2.13007	0.153799	13.8496	1.2784e-43	5.31023e-41
AT2G39350	Col.0	TRUE	518.604	2.12497	0.216933	9.79552	1.17692e-22	1.42587e-20
AT1G17940	Col.0	TRUE	265.518	2.1227	0.164053	12.9392	2.70586e-38	9.07815e-36
AT2G33590	Col.0	TRUE	485.681	2.11382	0.159598	13.2447	4.84416e-40	1.76065e-37
AT3G50400	Col.0	TRUE	150.564	2.11209	0.30265	6.97865	2.98037e-12	1.36471e-10
AT1G20450	Col.0	TRUE	2412.41	2.103	0.231385	9.08877	1.00169e-19	9.44617e-18
AT3G57540	Col.0	TRUE	137.847	2.0942	0.240938	8.69189	3.56468e-18	3.0485e-16
AT1G09500	Col.0	TRUE	58.2579	2.09002	0.265274	7.87871	3.30789e-15	2.1614e-13
AT5G04370	Col.0	TRUE	67.7171	2.08352	0.219052	9.51152	1.87889e-21	2.07463e-19
AT5G26220	Col.0	TRUE	93.5428	2.08297	0.19305	10.7898	3.84631e-27	6.33045e-25
AT1G67110	Col.0	TRUE	57.0244	-2.07748	0.292545	-7.10139	1.23506e-12	5.90325e-11
AT2G37770	Col.0	TRUE	240.142	2.07156	0.168335	12.3062	8.39263e-35	2.1532e-32
AT4G23450	Col.0	TRUE	33.4032	2.0714	0.355168	5.83217	5.47111e-09	1.51747e-07
AT1G73810	Col.0	TRUE	61.5797	2.07138	0.292694	7.07694	1.47367e-12	7.00536e-11
AT1G03870	Col.0	TRUE	514.635	-2.06188	0.284505	-7.24726	4.25277e-13	2.10181e-11
AT1G73480	Col.0	TRUE	1538.66	2.04772	0.159186	12.8637	7.20564e-38	2.37188e-35
AT1G72770	Col.0	TRUE	1389.12	2.04491	0.0890749	22.9572	1.24811e-116	5.44365e-113
AT3G22800	Col.0	TRUE	80.5418	-2.04179	0.357438	-5.71229	1.11467e-08	2.89815e-07
AT2G42530	Col.0	TRUE	166.496	2.02792	0.204512	9.9159	3.55028e-23	4.4939e-21
AT4G40010	Col.0	TRUE	120.603	2.02576	0.239292	8.46562	2.54794e-17	2.04845e-15
AT4G25850	Col.0	TRUE	23.7034	2.02444	0.342253	5.91503	3.31822e-09	9.537e-08
AT1G19970	Col.0	TRUE	202.269	2.01757	0.240784	8.37917	5.3304e-17	4.15152e-15
AT4G05100	Col.0	TRUE	87.8904	2.0161	0.224006	9.00021	2.25287e-19	2.05778e-17
AT1G75030	Col.0	TRUE	63.5509	2.00798	0.353526	5.67988	1.34793e-08	3.47355e-07
AT2G19810	Col.0	TRUE	315.596	2.0002	0.236533	8.45633	2.75928e-17	2.1981e-15
AT3G02410	Col.0	TRUE	25.9752	1.99911	0.412126	4.85071	1.23017e-06	2.11236e-05
AT5G44130	Col.0	TRUE	398.918	-1.99443	0.205479	-9.70628	2.83488e-22	3.36444e-20
AT3G23920	Col.0	TRUE	2451.86	1.99217	0.10635	18.7321	2.70776e-78	3.1493e-75
AT1G29640	Col.0	TRUE	159.944	1.99205	0.196106	10.158	3.05142e-24	4.32805e-22
AT4G03540	Col.0	TRUE	72.2189	1.97868	0.198081	9.98922	1.69913e-23	2.26283e-21
AT4G11350	Col.0	TRUE	99.9676	1.97773	0.212174	9.32124	1.14989e-20	1.19411e-18
AT1G02205	Col.0	TRUE	2893.79	1.97743	0.357922	5.52476	3.29931e-08	7.87411e-07
AT3G48520	Col.0	TRUE	389.188	1.97624	0.328492	6.01609	1.78684e-09	5.39329e-08
AT5G20830	Col.0	TRUE	468.978	1.97621	0.18919	10.4457	1.53401e-25	2.36834e-23
AT1G61890	Col.0	TRUE	1561.19	1.97528	0.298199	6.62403	3.49526e-11	1.34908e-09
AT4G34380	Col.0	TRUE	55.4573	1.96175	0.262861	7.46306	8.45356e-14	4.53787e-12
AT2G29460	Col.0	TRUE	60.4514	1.96121	0.269929	7.26567	3.71187e-13	1.8397e-11
AT1G45249	Col.0	TRUE	782.557	1.96015	0.149681	13.0955	3.49337e-39	1.24378e-36
AT1G18100	Col.0	TRUE	50.5112	1.95766	0.254577	7.68985	1.47302e-14	8.80079e-13
AT4G27657	Col.0	TRUE	34.6444	1.95668	0.313481	6.24178	4.32624e-10	1.42407e-08
AT1G54540	Col.0	TRUE	46.7188	1.95005	0.280698	6.94716	3.727e-12	1.65028e-10
AT2G10940	Col.0	TRUE	8142.74	-1.94907	0.241581	-8.06799	7.14676e-16	5.08907e-14
AT4G21930	Col.0	TRUE	33.1166	1.94881	0.28634	6.80591	1.00411e-11	4.21097e-10
AT4G33150	Col.0	TRUE	676.096	1.94182	0.227734	8.52671	1.50564e-17	1.22745e-15
AT5G65970	Col.0	TRUE	71.4431	-1.93279	0.249123	-7.7584	8.6006e-15	5.26478e-13
AT3G19580	Col.0	TRUE	104.77	1.93076	0.224111	8.61522	6.98069e-18	5.79929e-16
AT3G09910	Col.0	TRUE	33.3387	1.92863	0.324963	5.93491	2.94006e-09	8.59169e-08
AT5G45810	Col.0	TRUE	46.6178	1.92243	0.235936	8.14808	3.69757e-16	2.66561e-14
AT1G76590	Col.0	TRUE	54.1621	1.91666	0.283535	6.75987	1.38112e-11	5.64286e-10
AT3G48240	Col.0	TRUE	29.1191	1.9138	0.307456	6.22464	4.8266e-10	1.57687e-08
AT1G26770	Col.0	TRUE	1239.73	1.91142	0.200376	9.53916	1.43992e-21	1.61031e-19
AT5G08250	Col.0	TRUE	92.039	1.91089	0.325372	5.87293	4.28155e-09	1.2126e-07
AT5G61820	Col.0	TRUE	3515.68	1.91019	0.260294	7.3386	2.15845e-13	1.11409e-11
AT3G22600	Col.0	TRUE	1471.59	1.90937	0.204727	9.32641	1.09513e-20	1.15792e-18
AT5G15190	Col.0	TRUE	28.9035	1.90642	0.346005	5.5098	3.59243e-08	8.51542e-07
AT1G21270	Col.0	TRUE	52.5263	-1.89862	0.396147	-4.79271	1.64545e-06	2.74704e-05
AT1G17870	Col.0	TRUE	125.358	1.89732	0.156723	12.1062	9.79676e-34	2.27886e-31
AT1G74670	Col.0	TRUE	77.7055	-1.89314	0.276856	-6.83802	8.02954e-12	3.40836e-10
AT5G63130	Col.0	TRUE	74.3568	1.88524	0.218077	8.64484	5.38804e-18	4.51922e-16
AT5G52310	Col.0	TRUE	6951.03	1.88116	0.239661	7.84926	4.18515e-15	2.69425e-13
AT5G47530	Col.0	TRUE	101.136	1.87921	0.37793	4.97238	6.61358e-07	1.20313e-05
AT1G48100	Col.0	TRUE	394.167	1.87887	0.196291	9.57184	1.05016e-21	1.20533e-19
AT5G15130	Col.0	TRUE	106.279	-1.87056	0.193146	-9.68469	3.50261e-22	4.12881e-20
AT2G46270	Col.0	TRUE	284.349	1.87026	0.122087	15.3191	5.70109e-53	3.55219e-50
AT5G43350	Col.0	TRUE	959.311	-1.86579	0.266451	-7.00237	2.51675e-12	1.17399e-10
AT5G47980	Col.0	TRUE	116.197	-1.8646	0.20921	-8.91255	4.98705e-19	4.48475e-17
AT1G77450	Col.0	TRUE	374.855	1.86092	0.19226	9.67915	3.69785e-22	4.32971e-20
AT2G44380	Col.0	TRUE	88.5502	-1.85376	0.248272	-7.46666	8.22562e-14	4.44285e-12
AT3G50970	Col.0	TRUE	746.467	1.85269	0.250333	7.40091	1.35255e-13	7.12889e-12
AT1G52565	Col.0	TRUE	33.2356	1.85186	0.258561	7.16217	7.94088e-13	3.85896e-11
AT4G34000	Col.0	TRUE	1503.28	1.85154	0.15603	11.8665	1.7663e-32	3.88312e-30
AT1G05680	Col.0	TRUE	181.317	1.85034	0.149481	12.3784	3.41928e-35	8.9034e-33
AT4G17030	Col.0	TRUE	96.4399	1.84655	0.279365	6.6098	3.84837e-11	1.47558e-09
AT3G22620	Col.0	TRUE	1083.68	1.84345	0.309348	5.95915	2.53555e-09	7.48479e-08
AT2G18300	Col.0	TRUE	112.078	-1.84063	0.178019	-10.3395	4.66835e-25	6.90203e-23
AT2G34850	Col.0	TRUE	33.919	1.83935	0.262598	7.00444	2.47978e-12	1.15985e-10
AT5G48850	Col.0	TRUE	59.5282	1.83621	0.285869	6.42324	1.33404e-10	4.68284e-09
AT1G52827	Col.0	TRUE	63.5397	1.83585	0.248676	7.38252	1.55324e-13	8.13751e-12
AT5G13580	Col.0	TRUE	603.417	1.82933	0.234927	7.78679	6.87314e-15	4.26722e-13
AT5G15960	Col.0	TRUE	758.884	1.81134	0.239247	7.57104	3.70262e-14	2.1179e-12
AT1G68500	Col.0	TRUE	52.9249	1.8052	0.289472	6.23618	4.48398e-10	1.47044e-08
AT5G22460	Col.0	TRUE	38.882	1.79854	0.443346	4.05674	4.97626e-05	0.000555799
AT5G39610	Col.0	TRUE	51.0097	1.78969	0.237674	7.53005	5.07226e-14	2.87307e-12
AT4G02360	Col.0	TRUE	162.255	1.78335	0.238006	7.49286	6.73867e-14	3.73215e-12
AT5G14920	Col.0	TRUE	241.708	-1.76394	0.317066	-5.56332	2.64695e-08	6.44055e-07
AT1G02390	Col.0	TRUE	99.8543	1.76319	0.368486	4.78494	1.71039e-06	2.84456e-05
AT1G72680	Col.0	TRUE	189.97	1.76149	0.130535	13.4943	1.68913e-41	6.54856e-39
AT4G24415	Col.0	TRUE	58.7849	1.75659	0.305747	5.74523	9.17948e-09	2.42644e-07
AT3G57010	Col.0	TRUE	1745.9	1.75592	0.321678	5.45861	4.79868e-08	1.09578e-06
AT5G41040	Col.0	TRUE	325.64	1.75545	0.171871	10.2137	1.7212e-24	2.46132e-22
AT5G17860	Col.0	TRUE	331.825	1.75448	0.314082	5.58606	2.32276e-08	5.73979e-07
AT1G77530	Col.0	TRUE	93.1493	-1.75405	0.219426	-7.9938	1.30844e-15	9.02252e-14
AT2G40610	Col.0	TRUE	165.707	-1.75018	0.230711	-7.58604	3.29832e-14	1.89285e-12
AT1G03790	Col.0	TRUE	60.3052	1.74954	0.220885	7.9206	2.36361e-15	1.5799e-13
AT2G45180	Col.0	TRUE	3659.6	-1.74833	0.19137	-9.13584	6.48988e-20	6.18702e-18
AT1G75880	Col.0	TRUE	132.307	1.74795	0.30208	5.78636	7.19258e-09	1.93346e-07
AT5G05410	Col.0	TRUE	132.867	1.74751	0.213676	8.17832	2.87819e-16	2.10978e-14
AT4G31860	Col.0	TRUE	484.869	1.74718	0.122309	14.285	2.71524e-46	1.28027e-43
AT1G69252	Col.0	TRUE	325.274	1.74376	0.192343	9.06589	1.23592e-19	1.15924e-17
AT1G02220	Col.0	TRUE	40.301	1.74368	0.369493	4.71913	2.36856e-06	3.791e-05
AT1G02820	Col.0	TRUE	81.0514	1.74326	0.317954	5.48275	4.18771e-08	9.71528e-07
AT2G43570	Col.0	TRUE	66.374	1.74078	0.332033	5.2428	1.58161e-07	3.25129e-06
AT4G37990	Col.0	TRUE	60.6753	1.73803	0.237574	7.31574	2.55971e-13	1.30194e-11
AT4G33070	Col.0	TRUE	155.984	1.7344	0.159615	10.8662	1.67089e-27	2.83014e-25
AT5G13900	Col.0	TRUE	55.8738	1.72892	0.254806	6.78523	1.15904e-11	4.803e-10
AT1G31820	Col.0	TRUE	108.6	1.72824	0.244728	7.06187	1.64276e-12	7.74584e-11
AT5G10930	Col.0	TRUE	269.945	1.72804	0.128673	13.4297	4.05025e-41	1.5361e-38
AT3G60140	Col.0	TRUE	32.0474	1.72163	0.474561	3.62783	0.000285813	0.00250945
AT2G25625	Col.0	TRUE	197.956	1.71891	0.159088	10.8047	3.2689e-27	5.43135e-25
AT5G53120	Col.0	TRUE	661.992	1.71798	0.146168	11.7535	6.77851e-32	1.40783e-29
AT4G28040	Col.0	TRUE	267.254	1.71602	0.255568	6.71454	1.88654e-11	7.52799e-10
AT4G14690	Col.0	TRUE	222.402	1.71395	0.180009	9.52144	1.70803e-21	1.89798e-19
AT1G64110	Col.0	TRUE	97.9109	1.71229	0.250153	6.84499	7.64831e-12	3.25445e-10
AT1G77380	Col.0	TRUE	83.6155	-1.70962	0.341151	-5.01134	5.40519e-07	9.94715e-06
AT5G53970	Col.0	TRUE	342.94	1.70877	0.114719	14.8953	3.5339e-50	1.92664e-47
AT3G51860	Col.0	TRUE	422.556	1.70804	0.250274	6.82467	8.81253e-12	3.7226e-10
AT4G17280	Col.0	TRUE	132.357	1.70722	0.333616	5.11731	3.09925e-07	6.04129e-06
AT2G04350	Col.0	TRUE	1494.17	1.70369	0.276156	6.16931	6.85874e-10	2.21588e-08
AT4G15248	Col.0	TRUE	33.5356	1.69351	0.263166	6.43513	1.23365e-10	4.35927e-09
AT2G34810	Col.0	TRUE	1566.27	1.69289	0.348199	4.86185	1.16295e-06	2.01478e-05
AT3G11430	Col.0	TRUE	264.606	1.68843	0.304354	5.54759	2.89629e-08	6.9791e-07
AT4G20820	Col.0	TRUE	96.248	1.68733	0.219693	7.68042	1.58569e-14	9.40949e-13
AT5G22580	Col.0	TRUE	27.3034	-1.68631	0.385591	-4.37332	1.22369e-05	0.000162346
AT4G21850	Col.0	TRUE	206.127	-1.67497	0.257033	-6.51658	7.19294e-11	2.61434e-09
AT1G47960	Col.0	TRUE	69.6023	1.67304	0.257082	6.50782	7.62492e-11	2.76558e-09
AT4G33550	Col.0	TRUE	232.754	1.66515	0.206837	8.05056	8.24164e-16	5.8212e-14
AT5G13330	Col.0	TRUE	132.024	1.66314	0.196372	8.46935	2.46775e-17	2.00244e-15
AT1G50260	Col.0	TRUE	404.747	1.66035	0.118982	13.9546	2.94857e-44	1.25465e-41
AT5G47560	Col.0	TRUE	3889.84	1.65744	0.237555	6.97709	3.01365e-12	1.37634e-10
AT2G40370	Col.0	TRUE	216.813	1.65442	0.371241	4.45645	8.33277e-06	0.000115836
AT4G19230	Col.0	TRUE	450.726	1.65341	0.255243	6.47779	9.3077e-11	3.3412e-09
AT1G58270	Col.0	TRUE	3637.23	1.6532	0.301727	5.47915	4.27386e-08	9.88882e-07
AT2G02680	Col.0	TRUE	79.1379	-1.64989	0.221659	-7.44337	9.81507e-14	5.22054e-12
AT4G29190	Col.0	TRUE	312.275	1.6447	0.223742	7.35091	1.96869e-13	1.01916e-11
AT2G39110	Col.0	TRUE	135.84	1.64467	0.14306	11.4964	1.37587e-30	2.66705e-28
AT1G66760	Col.0	TRUE	561.464	1.64049	0.250387	6.55181	5.68449e-11	2.11453e-09
AT5G63180	Col.0	TRUE	101.305	-1.63926	0.352677	-4.64805	3.35092e-06	5.16432e-05
AT4G23870	Col.0	TRUE	120.304	1.63896	0.230522	7.10977	1.16235e-12	5.58634e-11
AT4G36410	Col.0	TRUE	22.7262	-1.63749	0.346087	-4.73143	2.22941e-06	3.58803e-05
AT2G27830	Col.0	TRUE	138.81	1.63449	0.234358	6.97431	3.07383e-12	1.40016e-10
AT1G57590	Col.0	TRUE	169.228	1.63278	0.364914	4.47441	7.66221e-06	0.000107977
AT3G45650	Col.0	TRUE	166.707	-1.63082	0.30494	-5.348	8.89296e-08	1.91539e-06
AT1G75500	Col.0	TRUE	1241.09	-1.62917	0.252449	-6.45348	1.09311e-10	3.89192e-09
AT1G63720	Col.0	TRUE	82.0347	1.62888	0.214655	7.58835	3.23996e-14	1.86549e-12
AT4G21870	Col.0	TRUE	52.4183	-1.62827	0.239849	-6.78874	1.1312e-11	4.69879e-10
AT1G13420	Col.0	TRUE	60.6832	-1.62811	0.244206	-6.66694	2.61194e-11	1.0217e-09
AT5G42200	Col.0	TRUE	29.2812	1.62612	0.269946	6.02387	1.70298e-09	5.18184e-08
AT1G65845	Col.0	TRUE	74.0328	-1.6258	0.254059	-6.39929	1.56101e-10	5.43581e-09
AT5G38240	Col.0	TRUE	27.7603	1.62309	0.321415	5.04983	4.42202e-07	8.30426e-06
AT1G68570	Col.0	TRUE	1115.76	1.62047	0.3366	4.81424	1.47761e-06	2.49791e-05
AT2G47485	Col.0	TRUE	197.676	1.62005	0.250585	6.46507	1.0125e-10	3.6123e-09
AT1G02310	Col.0	TRUE	42.6738	1.6185	0.252694	6.40496	1.5041e-10	5.25861e-09
AT3G27870	Col.0	TRUE	224.62	1.617	0.212408	7.6127	2.68425e-14	1.56098e-12
AT3G24460	Col.0	TRUE	427.477	1.61627	0.163031	9.91387	3.62321e-23	4.54752e-21
AT1G62540	Col.0	TRUE	198.702	1.61061	0.137238	11.7359	8.34791e-32	1.71338e-29
AT4G17550	Col.0	TRUE	957.25	1.61012	0.26474	6.08191	1.18757e-09	3.71965e-08
AT1G30760	Col.0	TRUE	105.395	-1.60523	0.299853	-5.35338	8.6325e-08	1.87084e-06
AT5G66460	Col.0	TRUE	266.067	1.60433	0.275881	5.81529	6.05305e-09	1.65002e-07
AT1G05650	Col.0	TRUE	45.0949	1.60388	0.331614	4.83657	1.32099e-06	2.2572e-05
AT4G24960	Col.0	TRUE	764.522	1.60253	0.159301	10.0598	8.32065e-24	1.14301e-21
AT1G02660	Col.0	TRUE	332.742	1.59951	0.174582	9.16194	5.09739e-20	4.9181e-18
AT1G52200	Col.0	TRUE	117.877	-1.59675	0.268618	-5.9443	2.7764e-09	8.14068e-08
AT3G17790	Col.0	TRUE	549.345	1.59515	0.149131	10.6963	1.05934e-26	1.69553e-24
AT5G47640	Col.0	TRUE	209.926	1.58615	0.203998	7.77531	7.52647e-15	4.63982e-13
AT1G72120	Col.0	TRUE	115.677	1.58455	0.312553	5.0697	3.98453e-07	7.5806e-06
AT1G01520	Col.0	TRUE	31.8693	1.58196	0.300041	5.27248	1.34596e-07	2.81216e-06
AT5G13210	Col.0	TRUE	88.1611	1.57971	0.226327	6.97976	2.95679e-12	1.35748e-10
AT1G61340	Col.0	TRUE	79.0628	1.57946	0.210199	7.51411	5.72986e-14	3.20395e-12
AT1G69430	Col.0	TRUE	25.2212	1.5781	0.329234	4.79325	1.64103e-06	2.7445e-05
AT3G20300	Col.0	TRUE	320.269	1.57523	0.251465	6.26423	3.74674e-10	1.24743e-08
AT1G71400	Col.0	TRUE	102.801	-1.57367	0.289359	-5.43847	5.37396e-08	1.21559e-06
AT1G14730	Col.0	TRUE	142.043	1.57321	0.255157	6.16567	7.01838e-10	2.25909e-08
AT1G02850	Col.0	TRUE	605.318	1.57278	0.241226	6.51994	7.03339e-11	2.56704e-09
AT1G13300	Col.0	TRUE	72.5201	-1.56887	0.239588	-6.54821	5.82317e-11	2.15692e-09
AT1G55740	Col.0	TRUE	229.035	1.56881	0.170358	9.20891	3.29441e-20	3.26559e-18
AT5G25190	Col.0	TRUE	38.6796	-1.56491	0.267716	-5.84541	5.05336e-09	1.41284e-07
AT4G03820	Col.0	TRUE	161.413	1.5638	0.28396	5.50711	3.64779e-08	8.63491e-07
AT3G14560	Col.0	TRUE	91.3171	1.56375	0.188241	8.30716	9.80202e-17	7.50027e-15
AT5G44680	Col.0	TRUE	135.443	-1.56214	0.18087	-8.63683	5.77938e-18	4.82426e-16
AT3G14590	Col.0	TRUE	111.681	1.56201	0.280684	5.56499	2.62169e-08	6.38798e-07
AT1G23480	Col.0	TRUE	112.262	-1.55484	0.269396	-5.77161	7.852e-09	2.10101e-07
AT4G22610	Col.0	TRUE	53.4559	-1.55308	0.268348	-5.78755	7.142e-09	1.92283e-07
AT3G62040	Col.0	TRUE	60.323	-1.55295	0.2364	-6.56917	5.05948e-11	1.89823e-09
AT3G23800	Col.0	TRUE	33.4736	-1.55294	0.262217	-5.92237	3.17343e-09	9.15101e-08
AT1G62510	Col.0	TRUE	542.403	1.55158	0.215987	7.1837	6.78491e-13	3.30641e-11
AT3G20110	Col.0	TRUE	36.0739	-1.54514	0.386076	-4.00216	6.27675e-05	0.000676769
AT1G13990	Col.0	TRUE	227.855	1.54413	0.136272	11.3313	9.18464e-30	1.68669e-27
AT5G15180	Col.0	TRUE	58.1845	1.5441	0.286263	5.39397	6.8918e-08	1.52775e-06
AT4G24410	Col.0	TRUE	60.0806	1.54343	0.245294	6.29216	3.13081e-10	1.05648e-08
AT5G61440	Col.0	TRUE	42.677	-1.54306	0.32023	-4.81858	1.44583e-06	2.45369e-05
AT5G48180	Col.0	TRUE	3368.29	1.54255	0.130188	11.8487	2.18574e-32	4.70771e-30
AT3G56260	Col.0	TRUE	75.8762	1.54221	0.193452	7.97206	1.56055e-15	1.06766e-13
AT4G23050	Col.0	TRUE	635.643	1.53852	0.130224	11.8144	3.28931e-32	6.9982e-30
AT1G01570	Col.0	TRUE	41.929	1.53761	0.343546	4.4757	7.61629e-06	0.000107416
AT5G45950	Col.0	TRUE	1232.04	1.53671	0.320908	4.78864	1.67919e-06	2.79802e-05
AT4G37370	Col.0	TRUE	67.3393	1.5326	0.441442	3.47181	0.000516965	0.00413621
AT4G11210	Col.0	TRUE	76.0015	-1.53215	0.230981	-6.63321	3.28475e-11	1.27346e-09
AT5G64230	Col.0	TRUE	146.621	1.53082	0.282483	5.41915	5.98832e-08	1.34456e-06
AT3G57680	Col.0	TRUE	57.1159	1.52482	0.251849	6.05452	1.40841e-09	4.34118e-08
AT4G33540	Col.0	TRUE	342.259	1.52347	0.121521	12.5367	4.70463e-36	1.39114e-33
AT1G28660	Col.0	TRUE	97.5362	-1.5234	0.227885	-6.68495	2.31005e-11	9.07682e-10
AT2G18150	Col.0	TRUE	50.2194	1.52219	0.4984	3.05416	0.00225695	0.0139478
AT1G51850	Col.0	TRUE	122.043	-1.52054	0.436229	-3.48564	0.000490969	0.003971
AT5G14780	Col.0	TRUE	576.653	1.51942	0.15295	9.9341	2.95845e-23	3.82319e-21
AT1G07720	Col.0	TRUE	1149.48	1.51821	0.325261	4.66768	3.04618e-06	4.75132e-05
AT1G72430	Col.0	TRUE	169.407	-1.51788	0.202821	-7.48383	7.21864e-14	3.94785e-12
AT3G45700	Col.0	TRUE	27.4463	-1.51682	0.385044	-3.93935	8.1704e-05	0.000850989
AT3G49570	Col.0	TRUE	116.087	1.51248	0.206973	7.30761	2.7193e-13	1.3751e-11
AT4G34650	Col.0	TRUE	130.332	1.51216	0.171578	8.81324	1.21583e-18	1.06057e-16
AT1G51140	Col.0	TRUE	440.514	1.50834	0.112695	13.3843	7.47442e-41	2.77444e-38
AT3G05400	Col.0	TRUE	184.666	1.50795	0.312234	4.82954	1.36847e-06	2.3292e-05
AT1G22330	Col.0	TRUE	96.2223	-1.50778	0.211086	-7.14297	9.13369e-13	4.40183e-11
AT3G09390	Col.0	TRUE	835.153	1.50587	0.161269	9.33758	9.85575e-21	1.04844e-18
AT1G72416	Col.0	TRUE	70.4639	-1.50392	0.193708	-7.76388	8.23717e-15	5.06006e-13
AT1G29195	Col.0	TRUE	21.2244	1.50373	0.314964	4.77428	1.80348e-06	2.98799e-05
AT5G39050	Col.0	TRUE	707.109	1.50261	0.153919	9.76235	1.6333e-22	1.96514e-20
AT5G64100	Col.0	TRUE	1530.94	-1.50049	0.311664	-4.81446	1.476e-06	2.4976e-05
AT3G14620	Col.0	TRUE	114.385	1.49891	0.397579	3.77009	0.000163189	0.00155351
AT1G20440	Col.0	TRUE	4429.91	1.49708	0.247705	6.04382	1.50508e-09	4.62281e-08
AT1G58360	Col.0	TRUE	1863.9	1.4964	0.290897	5.14407	2.68847e-07	5.29978e-06
AT4G17460	Col.0	TRUE	79.9754	-1.49574	0.270781	-5.5238	3.31751e-08	7.90673e-07
AT3G24463	Col.0	TRUE	73.7496	1.49532	0.199234	7.50535	6.12644e-14	3.41476e-12
AT3G51750	Col.0	TRUE	45.0296	1.49317	0.270115	5.52789	3.24096e-08	7.74545e-07
AT3G07350	Col.0	TRUE	432.496	1.49175	0.349384	4.26964	1.95784e-05	0.000245377
AT4G09500	Col.0	TRUE	184.207	1.49149	0.194952	7.65055	2.00125e-14	1.18352e-12
AT1G18870	Col.0	TRUE	555.301	1.48981	0.124963	11.922	9.09277e-33	2.03375e-30
AT3G14067	Col.0	TRUE	7126.01	1.4876	0.283363	5.2498	1.52261e-07	3.13618e-06
AT3G08870	Col.0	TRUE	33.4855	1.48743	0.335414	4.43461	9.2239e-06	0.000126311
AT1G18830	Col.0	TRUE	20.1859	1.4872	0.421767	3.52612	0.000421688	0.00350156
AT1G73830	Col.0	TRUE	54.4994	-1.48672	0.262113	-5.67206	1.41093e-08	3.63054e-07
AT1G58340	Col.0	TRUE	170.01	1.48619	0.264865	5.61113	2.01005e-08	5.03118e-07
AT1G63440	Col.0	TRUE	276.401	1.48591	0.266704	5.57137	2.52749e-08	6.19307e-07
AT1G21110	Col.0	TRUE	83.4721	-1.48274	0.18953	-7.82321	5.1492e-15	3.27857e-13
AT2G21130	Col.0	TRUE	54.2255	1.48247	0.309344	4.79232	1.64865e-06	2.74974e-05
AT5G53880	Col.0	TRUE	23.646	-1.48218	0.338912	-4.37335	1.22355e-05	0.000162346
AT3G01290	Col.0	TRUE	160.165	-1.47996	0.184441	-8.02401	1.0235e-15	7.14242e-14
AT5G44020	Col.0	TRUE	1180.59	-1.4793	0.174911	-8.45741	2.73388e-17	2.18785e-15
AT1G07560	Col.0	TRUE	46.3404	-1.4785	0.2826	-5.23177	1.67896e-07	3.42987e-06
AT3G27660	Col.0	TRUE	30.4347	1.47808	0.521122	2.83635	0.00456325	0.0245908
AT1G01720	Col.0	TRUE	924.387	1.47678	0.131356	11.2425	2.52008e-29	4.53251e-27
AT1G28260	Col.0	TRUE	155.275	1.47627	0.16135	9.14947	5.72135e-20	5.48433e-18
AT3G11420	Col.0	TRUE	597.031	1.4755	0.202452	7.28815	3.14244e-13	1.57086e-11
AT1G66940	Col.0	TRUE	95.5865	-1.47446	0.208745	-7.06348	1.62389e-12	7.6776e-11
AT5G62020	Col.0	TRUE	171.667	1.47383	0.167456	8.80131	1.35232e-18	1.17376e-16
AT3G50740	Col.0	TRUE	231.997	-1.47082	0.118434	-12.4189	2.065e-35	5.54245e-33
AT3G04010	Col.0	TRUE	231.834	1.46915	0.320059	4.59024	4.42742e-06	6.57369e-05
AT5G28770	Col.0	TRUE	34.7952	-1.46823	0.350736	-4.18614	2.83732e-05	0.000337193
AT1G79270	Col.0	TRUE	708.168	1.46726	0.112847	13.0022	1.1889e-38	4.14832e-36
AT5G17760	Col.0	TRUE	168.618	1.46724	0.262067	5.59873	2.15932e-08	5.36632e-07
AT3G05937	Col.0	TRUE	34.556	1.46536	0.251361	5.82971	5.55226e-09	1.53705e-07
AT5G13750	Col.0	TRUE	913.346	1.46517	0.214955	6.81619	9.34876e-12	3.93008e-10
AT2G46950	Col.0	TRUE	30.7906	1.46288	0.279573	5.23253	1.67204e-07	3.41974e-06
AT3G59340	Col.0	TRUE	34.9049	-1.46003	0.324411	-4.50055	6.77764e-06	9.69997e-05
AT3G24420	Col.0	TRUE	255.197	1.45861	0.201938	7.22305	5.08344e-13	2.50524e-11
AT1G01470	Col.0	TRUE	852.872	1.45694	0.209714	6.94726	3.72437e-12	1.65028e-10
AT1G09950	Col.0	TRUE	21.5677	1.45286	0.345654	4.20323	2.63134e-05	0.000315942
AT3G10910	Col.0	TRUE	174.452	1.45185	0.143907	10.0888	6.19435e-24	8.57672e-22
AT5G48490	Col.0	TRUE	132.03	-1.45108	0.217666	-6.66652	2.61941e-11	1.02233e-09
AT3G51895	Col.0	TRUE	243.239	1.45082	0.228899	6.33825	2.32395e-10	7.91868e-09
AT5G26280	Col.0	TRUE	927.218	-1.45076	0.248941	-5.82774	5.61845e-09	1.54361e-07
AT3G05936	Col.0	TRUE	24.2618	1.45041	0.293522	4.94142	7.75573e-07	1.39061e-05
AT5G65990	Col.0	TRUE	1253.74	1.45017	0.265461	5.46284	4.68583e-08	1.07282e-06
AT1G24070	Col.0	TRUE	466.688	1.44974	0.253338	5.72253	1.04949e-08	2.74917e-07
AT1G22160	Col.0	TRUE	74.0597	1.44819	0.273511	5.29482	1.19134e-07	2.51016e-06
AT1G52190	Col.0	TRUE	176.836	-1.4462	0.32559	-4.44179	8.92153e-06	0.00012304
AT1G30260	Col.0	TRUE	58.3572	1.44587	0.25543	5.66054	1.50895e-08	3.86567e-07
AT5G20250	Col.0	TRUE	540.175	-1.44512	0.179068	-8.07022	7.01701e-16	5.01716e-14
AT5G62280	Col.0	TRUE	94.7477	-1.44502	0.331871	-4.35417	1.33573e-05	0.000175081
AT3G48020	Col.0	TRUE	23.6728	1.44387	0.317829	4.54291	5.54819e-06	8.10668e-05
AT3G14280	Col.0	TRUE	34.1747	1.44192	0.275043	5.24254	1.58381e-07	3.25129e-06
AT5G13200	Col.0	TRUE	284.707	1.44154	0.163072	8.83993	9.57829e-19	8.43954e-17
AT5G43150	Col.0	TRUE	435.879	1.44105	0.264208	5.4542	4.91926e-08	1.11905e-06
AT5G37540	Col.0	TRUE	205.462	1.44059	0.289586	4.97466	6.53623e-07	1.1903e-05
AT2G37900	Col.0	TRUE	22.5034	1.44057	0.36	4.00157	6.29228e-05	0.000677624
AT1G08230	Col.0	TRUE	280.047	1.43872	0.138413	10.3944	2.62971e-25	3.98939e-23
AT3G11690	Col.0	TRUE	379.166	1.4369	0.13835	10.386	2.87261e-25	4.3203e-23
AT2G02710	Col.0	TRUE	321.753	1.43665	0.189058	7.59897	2.98485e-14	1.73003e-12
AT3G47580	Col.0	TRUE	19.9805	1.43297	0.423916	3.38031	0.000724054	0.00546833
AT1G47510	Col.0	TRUE	18.3357	1.43129	0.377897	3.78751	0.000152167	0.0014675
AT5G67480	Col.0	TRUE	221.873	1.42943	0.154911	9.22744	2.77182e-20	2.76327e-18
AT5G62470	Col.0	TRUE	300.254	1.42684	0.180238	7.91642	2.44451e-15	1.62277e-13
AT5G63160	Col.0	TRUE	178.96	1.42621	0.209004	6.82385	8.86333e-12	3.73502e-10
AT3G26290	Col.0	TRUE	648.511	1.42583	0.3521	4.04949	5.13295e-05	0.000569531
AT2G18170	Col.0	TRUE	201.889	1.42358	0.155382	9.16183	5.10246e-20	4.9181e-18
AT1G27200	Col.0	TRUE	534.107	1.42001	0.204039	6.9595	3.41494e-12	1.52762e-10
AT5G05440	Col.0	TRUE	185.705	-1.41973	0.186181	-7.62554	2.43022e-14	1.41798e-12
AT4G34710	Col.0	TRUE	22975.2	1.41821	0.124387	11.4016	4.10426e-30	7.69923e-28
AT1G07040	Col.0	TRUE	129.619	1.41618	0.156626	9.04179	1.54125e-19	1.42268e-17
AT1G67920	Col.0	TRUE	24.3032	1.41614	0.303947	4.65915	3.17515e-06	4.9195e-05
AT3G16990	Col.0	TRUE	88.5158	1.41565	0.182562	7.75439	8.87688e-15	5.4149e-13
AT4G23820	Col.0	TRUE	338.198	-1.41565	0.212388	-6.66538	2.63976e-11	1.02797e-09
AT2G43820	Col.0	TRUE	542.256	1.4132	0.156047	9.05619	1.35086e-19	1.26027e-17
AT5G42380	Col.0	TRUE	23.018	1.4106	0.351777	4.00992	6.07393e-05	0.000657764
AT5G03350	Col.0	TRUE	37.088	-1.41051	0.318228	-4.4324	9.31917e-06	0.000127216
AT4G36610	Col.0	TRUE	84.8894	1.41026	0.171301	8.23266	1.83108e-16	1.35936e-14
AT5G52050	Col.0	TRUE	408.177	1.40867	0.273203	5.15613	2.521e-07	4.99879e-06
AT1G23060	Col.0	TRUE	16.8045	1.40819	0.353297	3.98586	6.72355e-05	0.000717865
AT5G43450	Col.0	TRUE	125.27	1.40689	0.224961	6.25392	4.00273e-10	1.32508e-08
AT1G69610	Col.0	TRUE	90.2018	1.4056	0.239786	5.86188	4.57664e-09	1.28989e-07
AT1G63010	Col.0	TRUE	1266.32	1.40429	0.166765	8.4208	3.73923e-17	2.95179e-15
AT4G03210	Col.0	TRUE	371.722	-1.40361	0.241118	-5.82127	5.84004e-09	1.59946e-07
AT4G14270	Col.0	TRUE	120.746	1.40354	0.288494	4.86506	1.14424e-06	1.99026e-05
AT3G25620	Col.0	TRUE	111.442	1.40277	0.199963	7.01518	2.2965e-12	1.07701e-10
AT1G54690	Col.0	TRUE	32.1846	-1.40251	0.316336	-4.4336	9.26716e-06	0.000126704
AT1G67360	Col.0	TRUE	309.925	1.40202	0.150643	9.30694	1.31573e-20	1.35025e-18
AT2G26440	Col.0	TRUE	111.889	-1.39735	0.367253	-3.80487	0.00014188	0.00138282
AT1G21410	Col.0	TRUE	145.208	1.39627	0.162766	8.5784	9.62039e-18	7.91686e-16
AT4G36670	Col.0	TRUE	131.844	-1.39582	0.247233	-5.64575	1.64464e-08	4.1704e-07
AT1G64660	Col.0	TRUE	462.604	1.39573	0.140758	9.91578	3.55473e-23	4.4939e-21
AT5G04250	Col.0	TRUE	110.631	1.39551	0.156362	8.92488	4.46171e-19	4.03311e-17
AT2G45900	Col.0	TRUE	70.2775	1.39425	0.273113	5.10501	3.30776e-07	6.43335e-06
AT2G41090	Col.0	TRUE	76.9544	-1.39419	0.264074	-5.27954	1.29505e-07	2.70905e-06
AT1G78610	Col.0	TRUE	860.86	1.39383	0.216599	6.43504	1.23437e-10	4.35927e-09
AT5G60680	Col.0	TRUE	461.208	1.39363	0.36488	3.81943	0.000133763	0.00131029
AT5G23240	Col.0	TRUE	31.7527	1.39134	0.275021	5.05904	4.21379e-07	7.98196e-06
AT1G19050	Col.0	TRUE	56.4644	-1.39057	0.206795	-6.72442	1.76292e-11	7.11944e-10
AT4G34230	Col.0	TRUE	1194.43	1.38968	0.159079	8.73577	2.42006e-18	2.07982e-16
AT2G22240	Col.0	TRUE	539.447	1.38875	0.125032	11.1072	1.15712e-28	1.99872e-26
AT1G76240	Col.0	TRUE	119.116	-1.38857	0.204443	-6.79198	1.10604e-11	4.60524e-10
AT3G50350	Col.0	TRUE	69.7365	-1.38838	0.239527	-5.79636	6.77687e-09	1.83301e-07
AT5G47550	Col.0	TRUE	137.336	1.38835	0.200915	6.91013	4.84218e-12	2.11721e-10
AT5G13910	Col.0	TRUE	31.1045	1.38799	0.311162	4.46066	8.17077e-06	0.000114038
AT2G40000	Col.0	TRUE	348.959	1.38649	0.153758	9.01734	1.92716e-19	1.76954e-17
AT1G46554	Col.0	TRUE	35.3657	1.3862	0.291607	4.75364	1.9979e-06	3.26361e-05
AT4G01060	Col.0	TRUE	26.1549	1.38615	0.344411	4.0247	5.70482e-05	0.000623598
AT5G13370	Col.0	TRUE	348.075	1.3855	0.129924	10.6639	1.50086e-26	2.38037e-24
AT1G08920	Col.0	TRUE	729.323	1.38525	0.260871	5.3101	1.09568e-07	2.32828e-06
AT1G62710	Col.0	TRUE	275.817	1.38389	0.247084	5.60088	2.13264e-08	5.30756e-07
AT1G52080	Col.0	TRUE	99.2763	1.38147	0.298709	4.6248	3.74962e-06	5.67846e-05
AT1G12740	Col.0	TRUE	241.893	-1.38008	0.252103	-5.47426	4.39333e-08	1.01384e-06
AT1G35140	Col.0	TRUE	61.9465	-1.37933	0.360763	-3.82338	0.000131634	0.00129306
AT3G10340	Col.0	TRUE	544.559	1.37856	0.117017	11.7808	4.9018e-32	1.03032e-29
AT2G39050	Col.0	TRUE	428.091	1.37722	0.166197	8.28665	1.16486e-16	8.83573e-15
AT4G29930	Col.0	TRUE	94.6686	1.37689	0.164153	8.38783	4.95203e-17	3.87413e-15
AT1G21670	Col.0	TRUE	356.068	1.37594	0.304577	4.51754	6.25632e-06	9.02793e-05
AT1G43160	Col.0	TRUE	181.885	1.37287	0.245015	5.6032	2.10427e-08	5.25194e-07
AT2G32800	Col.0	TRUE	737.323	1.37257	0.133457	10.2848	8.25167e-25	1.19965e-22
AT5G66650	Col.0	TRUE	87.9303	1.37225	0.177186	7.74465	9.58475e-15	5.82633e-13
AT4G35640	Col.0	TRUE	43.3177	1.37218	0.218242	6.28741	3.22802e-10	1.08509e-08
AT1G75170	Col.0	TRUE	61.8238	1.37168	0.205153	6.68613	2.29147e-11	9.02413e-10
AT4G15490	Col.0	TRUE	584.168	1.37142	0.110426	12.4193	2.05306e-35	5.54245e-33
AT4G12730	Col.0	TRUE	2079.88	-1.37112	0.217961	-6.29064	3.16153e-10	1.06479e-08
AT1G56120	Col.0	TRUE	19.3057	-1.36755	0.365626	-3.7403	0.000183798	0.00171841
AT4G16760	Col.0	TRUE	2871.94	1.36583	0.114468	11.932	8.06382e-33	1.82703e-30
AT2G42790	Col.0	TRUE	477.834	1.36565	0.105228	12.978	1.62982e-38	5.57526e-36
AT1G36370	Col.0	TRUE	892.153	1.36392	0.131524	10.3701	3.3924e-25	5.05844e-23
AT2G15960	Col.0	TRUE	91.9542	1.36338	0.187184	7.28365	3.24903e-13	1.6195e-11
AT5G49690	Col.0	TRUE	23.2577	1.36303	0.289304	4.7114	2.46019e-06	3.9161e-05
AT1G04570	Col.0	TRUE	46.8895	1.36301	0.230357	5.91694	3.27983e-09	9.44222e-08
AT5G04310	Col.0	TRUE	41.4571	-1.36288	0.37314	-3.65247	0.000259729	0.00231895
AT5G04340	Col.0	TRUE	253.383	1.35964	0.172462	7.88375	3.1771e-15	2.09161e-13
AT4G37690	Col.0	TRUE	19.3687	1.35801	0.32778	4.14306	3.42698e-05	0.000398315
AT5G04760	Col.0	TRUE	99.5221	1.35717	0.199606	6.79926	1.05157e-11	4.39943e-10
AT4G00950	Col.0	TRUE	41.406	-1.35605	0.262475	-5.16641	2.38639e-07	4.76349e-06
AT5G09520	Col.0	TRUE	90.6128	1.35547	0.181536	7.46669	8.22369e-14	4.44285e-12
AT1G11175	Col.0	TRUE	85.5919	1.35505	0.201544	6.72335	1.7759e-11	7.15506e-10
AT4G22270	Col.0	TRUE	69.4593	1.35448	0.250097	5.41583	6.10056e-08	1.368e-06
AT4G30460	Col.0	TRUE	304.816	1.35385	0.151992	8.90735	5.22679e-19	4.67624e-17
AT3G06420	Col.0	TRUE	34.4143	1.35153	0.255356	5.29272	1.2051e-07	2.53609e-06
AT1G64170	Col.0	TRUE	129.896	-1.34878	0.398109	-3.38796	0.000704145	0.00534574
AT1G13670	Col.0	TRUE	25.5246	-1.34833	0.345143	-3.90658	9.36116e-05	0.000954499
AT5G37550	Col.0	TRUE	22.1588	1.3457	0.315951	4.25921	2.05152e-05	0.000256197
AT4G12430	Col.0	TRUE	60.1981	1.34284	0.224617	5.97833	2.25439e-09	6.67743e-08
AT1G07370	Col.0	TRUE	69.8094	-1.3403	0.218125	-6.14462	8.01541e-10	2.55643e-08
AT5G67450	Col.0	TRUE	19.5472	-1.34024	0.423428	-3.16522	0.00154967	0.0102953
AT2G16990	Col.0	TRUE	86.313	1.33996	0.198109	6.76376	1.34452e-11	5.5322e-10
AT5G15240	Col.0	TRUE	88.6994	1.33863	0.170156	7.86712	3.62911e-15	2.35366e-13
AT2G26150	Col.0	TRUE	52.3646	1.33813	0.304095	4.40037	1.08069e-05	0.000145252
AT3G05880	Col.0	TRUE	656.446	1.33581	0.197877	6.75072	1.4711e-11	5.98249e-10
AT5G39090	Col.0	TRUE	26.1584	1.33189	0.313266	4.25163	2.12225e-05	0.000263521
AT1G13110	Col.0	TRUE	276.328	-1.33011	0.289624	-4.59255	4.37873e-06	6.50692e-05
AT4G00940	Col.0	TRUE	27.1741	1.32902	0.285877	4.64891	3.33691e-06	5.14728e-05
AT5G01880	Col.0	TRUE	106.391	1.32685	0.180828	7.33765	2.17377e-13	1.11869e-11
AT3G23740	Col.0	TRUE	38.2597	-1.32537	0.248744	-5.32826	9.91565e-08	2.12778e-06
AT1G02360	Col.0	TRUE	229.873	-1.32481	0.230358	-5.75108	8.86778e-09	2.35117e-07
AT3G62550	Col.0	TRUE	146.113	1.3233	0.304086	4.35173	1.35066e-05	0.000176772
AT4G24015	Col.0	TRUE	29.7785	-1.32105	0.28958	-4.56196	5.06775e-06	7.44835e-05
AT5G54840	Col.0	TRUE	193.221	1.31971	0.172699	7.64167	2.14417e-14	1.2595e-12
AT3G62150	Col.0	TRUE	92.2538	-1.31856	0.314597	-4.19126	2.77406e-05	0.00033035
AT2G30550	Col.0	TRUE	416.208	1.31648	0.129639	10.1549	3.15092e-24	4.43314e-22
AT1G33480	Col.0	TRUE	124.078	1.3148	0.165086	7.96434	1.66104e-15	1.13197e-13
AT2G26690	Col.0	TRUE	1941.85	1.31405	0.30572	4.2982	1.72189e-05	0.000218633
AT5G03120	Col.0	TRUE	44.2425	-1.31403	0.29521	-4.45118	8.54006e-06	0.000118434
AT2G30600	Col.0	TRUE	631.299	-1.31301	0.175918	-7.46378	8.40764e-14	4.52715e-12
AT3G22200	Col.0	TRUE	1611.5	1.31278	0.106785	12.2936	9.80564e-35	2.47926e-32
AT3G51350	Col.0	TRUE	26.6359	-1.31037	0.278777	-4.70043	2.59609e-06	4.11186e-05
AT2G34510	Col.0	TRUE	251.785	-1.30839	0.130699	-10.0107	1.36786e-23	1.8499e-21
AT3G56880	Col.0	TRUE	305.276	1.30725	0.223245	5.85566	4.75109e-09	1.33689e-07
AT3G01420	Col.0	TRUE	4764.77	1.30425	0.364536	3.57784	0.000346448	0.00296135
AT2G41170	Col.0	TRUE	286.92	1.30116	0.25167	5.1701	2.33966e-07	4.69169e-06
AT4G19690	Col.0	TRUE	49.7538	-1.29912	0.297576	-4.36565	1.26743e-05	0.000167001
AT2G46880	Col.0	TRUE	25.441	-1.29741	0.428665	-3.02663	0.00247295	0.0150534
AT2G38820	Col.0	TRUE	117.498	1.29501	0.236135	5.48421	4.1533e-08	9.66113e-07
AT2G21590	Col.0	TRUE	103.223	1.29469	0.244729	5.29032	1.22102e-07	2.56032e-06
AT1G54575	Col.0	TRUE	54.5914	1.2946	0.382001	3.38899	0.000701501	0.00533728
AT5G62360	Col.0	TRUE	53.4952	-1.29362	0.256449	-5.04436	4.55052e-07	8.49983e-06
AT3G04000	Col.0	TRUE	30.2127	1.29102	0.267077	4.83389	1.33894e-06	2.28562e-05
AT4G02380	Col.0	TRUE	400.606	1.2873	0.183373	7.0201	2.21702e-12	1.04254e-10
AT1G11170	Col.0	TRUE	51.8966	1.28711	0.305608	4.21165	2.53508e-05	0.000305858
AT1G29660	Col.0	TRUE	1135.05	-1.28611	0.209814	-6.12978	8.79997e-10	2.79135e-08
AT5G25610	Col.0	TRUE	12491.2	1.28426	0.262708	4.88856	1.01577e-06	1.78035e-05
AT5G54230	Col.0	TRUE	24.9991	1.28339	0.313978	4.08751	4.36037e-05	0.000493184
AT1G22640	Col.0	TRUE	179.446	1.28046	0.194806	6.57299	4.93153e-11	1.85822e-09
AT1G58370	Col.0	TRUE	72.0355	-1.28011	0.190616	-6.71568	1.87194e-11	7.49034e-10
AT5G10300	Col.0	TRUE	66.9831	1.27863	0.208856	6.12207	9.23688e-10	2.91932e-08
AT2G42380	Col.0	TRUE	209.842	-1.27862	0.14033	-9.11151	8.12423e-20	7.70301e-18
AT3G44735	Col.0	TRUE	126.434	1.2786	0.256167	4.99127	5.99846e-07	1.0958e-05
AT1G59700	Col.0	TRUE	125.89	1.27857	0.16643	7.68234	1.56214e-14	9.30137e-13
AT4G01360	Col.0	TRUE	19.2278	1.27755	0.4065	3.14281	0.00167334	0.0109337
AT1G50960	Col.0	TRUE	23.1873	1.27673	0.344123	3.71009	0.000207183	0.00191751
AT1G76180	Col.0	TRUE	1290.19	1.27394	0.183261	6.95148	3.61485e-12	1.60879e-10
AT1G06570	Col.0	TRUE	603.079	1.27185	0.112107	11.345	7.85276e-30	1.45744e-27
AT1G01190	Col.0	TRUE	72.6019	-1.26755	0.364429	-3.47817	0.000504848	0.00406158
AT2G41870	Col.0	TRUE	486.771	1.26719	0.164209	7.71697	1.19124e-14	7.14172e-13
AT2G28110	Col.0	TRUE	134.809	1.26684	0.248341	5.10123	3.37447e-07	6.54122e-06
AT1G02816	Col.0	TRUE	144.456	1.26681	0.183348	6.90934	4.86914e-12	2.12368e-10
AT1G08290	Col.0	TRUE	21.5161	1.26411	0.299192	4.22507	2.38868e-05	0.000290404
AT1G53580	Col.0	TRUE	497.404	1.26379	0.149524	8.4521	2.8612e-17	2.26893e-15
AT5G53990	Col.0	TRUE	51.3006	1.26358	0.21055	6.00135	1.9569e-09	5.8359e-08
AT1G26330	Col.0	TRUE	28.9095	-1.26276	0.2858	-4.41835	9.94596e-06	0.000134405
AT4G21400	Col.0	TRUE	59.7671	-1.26249	0.219742	-5.74533	9.1741e-09	2.42644e-07
AT5G62340	Col.0	TRUE	89.7965	-1.26145	0.175203	-7.19992	6.0249e-13	2.96085e-11
AT5G19530	Col.0	TRUE	146.774	-1.26119	0.238029	-5.2985	1.16758e-07	2.46606e-06
AT3G55290	Col.0	TRUE	71.7452	1.26011	0.291996	4.31552	1.59231e-05	0.000203363
AT4G30960	Col.0	TRUE	4010.49	1.25791	0.0994469	12.6491	1.13172e-36	3.46386e-34
AT1G14630	Col.0	TRUE	25.054	-1.25676	0.314391	-3.99745	6.40291e-05	0.000686838
AT1G51790	Col.0	TRUE	126.912	-1.25446	0.291152	-4.30862	1.64275e-05	0.000209193
AT2G32510	Col.0	TRUE	153.912	1.25445	0.186059	6.74223	1.55973e-11	6.31349e-10
AT5G02230	Col.0	TRUE	328.446	1.25379	0.111694	11.2252	3.06611e-29	5.4583e-27
AT4G16690	Col.0	TRUE	109.795	1.25369	0.18743	6.68883	2.24962e-11	8.87937e-10
AT4G15390	Col.0	TRUE	83.6273	-1.25333	0.182559	-6.86536	6.6323e-12	2.82902e-10
AT2G35930	Col.0	TRUE	65.4764	-1.25325	0.2765	-4.53255	5.82768e-06	8.46542e-05
AT1G68850	Col.0	TRUE	145.818	1.25154	0.343972	3.6385	0.000274227	0.00242481
AT5G62480	Col.0	TRUE	48.4994	1.25147	0.232639	5.37943	7.47205e-08	1.64801e-06
AT1G03070	Col.0	TRUE	22.731	1.25113	0.353485	3.5394	0.000401031	0.00335237
AT2G33330	Col.0	TRUE	151.605	-1.25073	0.179482	-6.96854	3.20237e-12	1.44363e-10
AT4G12000	Col.0	TRUE	103.508	1.25039	0.204613	6.11098	9.90241e-10	3.11837e-08
AT5G37500	Col.0	TRUE	130.07	1.24971	0.215037	5.81159	6.18817e-09	1.68423e-07
AT1G53560	Col.0	TRUE	159.509	1.24766	0.202355	6.1657	7.01702e-10	2.25909e-08
AT3G53960	Col.0	TRUE	137.059	1.24702	0.243425	5.1228	3.01031e-07	5.87448e-06
AT5G57910	Col.0	TRUE	39.0801	1.24693	0.245691	5.07521	3.87066e-07	7.37241e-06
AT1G55990	Col.0	TRUE	325.069	1.24673	0.317509	3.92661	8.615e-05	0.000892643
AT4G15150	Col.0	TRUE	27.2212	1.2458	0.396912	3.13872	0.00169686	0.0110501
AT2G17230	Col.0	TRUE	481.545	-1.24455	0.324576	-3.8344	0.000125873	0.00123927
AT2G47560	Col.0	TRUE	40.9702	-1.24426	0.27733	-4.48656	7.23818e-06	0.000102915
AT2G15970	Col.0	TRUE	5384.67	1.24389	0.135204	9.2001	3.57633e-20	3.52501e-18
AT2G35940	Col.0	TRUE	432.467	1.24318	0.180998	6.86848	6.4889e-12	2.78831e-10
AT4G20880	Col.0	TRUE	201.375	1.24305	0.212396	5.8525	4.84242e-09	1.3604e-07
AT5G52882	Col.0	TRUE	268.251	-1.24176	0.16874	-7.35898	1.8532e-13	9.651e-12
AT1G05300	Col.0	TRUE	67.316	-1.23949	0.349754	-3.54389	0.000394265	0.00330462
AT5G03230	Col.0	TRUE	281.916	1.2373	0.287312	4.30646	1.6589e-05	0.000210788
AT1G21120	Col.0	TRUE	26.2589	-1.2368	0.320628	-3.85744	0.000114582	0.00114294
AT4G35790	Col.0	TRUE	1824.78	1.23632	0.0833923	14.8254	1.00367e-49	5.15e-47
AT2G21180	Col.0	TRUE	94.0129	1.23625	0.196118	6.30361	2.90795e-10	9.85091e-09
AT1G77000	Col.0	TRUE	99.4275	1.23425	0.177074	6.97024	3.16395e-12	1.43372e-10
AT5G57800	Col.0	TRUE	2899.83	1.23322	0.262371	4.70031	2.59769e-06	4.11186e-05
AT4G01750	Col.0	TRUE	133.137	-1.23222	0.293231	-4.20222	2.64306e-05	0.00031713
AT5G61790	Col.0	TRUE	2877.4	-1.23067	0.257128	-4.78624	1.69933e-06	2.82886e-05
AT4G21410	Col.0	TRUE	321.948	-1.22838	0.159151	-7.71832	1.17874e-14	7.09112e-13
AT5G63850	Col.0	TRUE	683.265	-1.2263	0.267716	-4.58061	4.63629e-06	6.86045e-05
AT3G09940	Col.0	TRUE	136.984	-1.22612	0.18858	-6.50185	7.93376e-11	2.86999e-09
AT5G39030	Col.0	TRUE	27.9005	1.22585	0.4022	3.04786	0.00230475	0.014198
AT4G30800	Col.0	TRUE	44.8025	-1.22537	0.2856	-4.29052	1.78253e-05	0.000225512
AT1G09530	Col.0	TRUE	289.941	1.22428	0.180705	6.77501	1.244e-11	5.14285e-10
AT4G12480	Col.0	TRUE	96.7044	-1.22381	0.389693	-3.14046	0.00168683	0.0109959
AT4G28490	Col.0	TRUE	259.388	1.22323	0.293493	4.16783	3.0751e-05	0.000362243
AT5G57190	Col.0	TRUE	47.2423	-1.22294	0.223633	-5.46849	4.53881e-08	1.04327e-06
AT4G12290	Col.0	TRUE	83.1083	1.22267	0.397853	3.07317	0.002118	0.0132159
AT3G06500	Col.0	TRUE	638.712	1.21801	0.0951712	12.7981	1.67958e-37	5.32762e-35
AT4G11190	Col.0	TRUE	119.989	-1.21747	0.313685	-3.88119	0.000103944	0.00104882
AT3G13610	Col.0	TRUE	68.5282	-1.21743	0.207005	-5.88115	4.07432e-09	1.15766e-07
AT5G65140	Col.0	TRUE	101.272	1.21673	0.21284	5.71664	1.08649e-08	2.83332e-07
AT4G22820	Col.0	TRUE	200.226	1.21597	0.160164	7.59199	3.15038e-14	1.81992e-12
AT4G18610	Col.0	TRUE	26.8627	-1.21547	0.300979	-4.03837	5.38229e-05	0.000593173
AT1G70420	Col.0	TRUE	89.5256	1.21515	0.216885	5.60277	2.10957e-08	5.25764e-07
AT5G52810	Col.0	TRUE	150.846	1.21506	0.190497	6.37838	1.78966e-10	6.18265e-09
AT1G28670	Col.0	TRUE	221.915	-1.21477	0.225963	-5.37595	7.61793e-08	1.67806e-06
AT4G02800	Col.0	TRUE	39.2728	-1.21449	0.317864	-3.82078	0.000133028	0.00130382
AT1G67300	Col.0	TRUE	395.854	1.214	0.200147	6.06553	1.31516e-09	4.08261e-08
AT3G48350	Col.0	TRUE	289.285	1.2138	0.236515	5.13203	2.86627e-07	5.61224e-06
AT5G22270	Col.0	TRUE	24.6242	1.21343	0.272177	4.45823	8.26394e-06	0.000115062
AT5G57900	Col.0	TRUE	183.804	1.21334	0.147297	8.23735	1.76074e-16	1.31273e-14
AT3G14360	Col.0	TRUE	46.03	1.21333	0.21791	5.56804	2.57623e-08	6.28599e-07
AT1G78120	Col.0	TRUE	70.8091	-1.21286	0.208056	-5.8295	5.55933e-09	1.53705e-07
AT4G19390	Col.0	TRUE	87.964	1.21228	0.193075	6.27882	3.41148e-10	1.14017e-08
AT1G52155	Col.0	TRUE	32.6197	1.21216	0.331716	3.65421	0.00025797	0.00230561
AT1G46768	Col.0	TRUE	36.4553	1.21165	0.273205	4.43496	9.20913e-06	0.000126208
AT4G09820	Col.0	TRUE	41.9982	1.21137	0.226068	5.35842	8.39551e-08	1.82628e-06
AT1G30500	Col.0	TRUE	59.6853	1.20919	0.206246	5.86286	4.54963e-09	1.28435e-07
AT4G38060	Col.0	TRUE	168.038	1.20892	0.148285	8.15265	3.56032e-16	2.58806e-14
AT2G31585	Col.0	TRUE	40.5766	1.20842	0.26281	4.59807	4.2643e-06	6.36661e-05
AT3G60160	Col.0	TRUE	38.6123	1.20817	0.370755	3.25867	0.00111934	0.00785838
AT3G55840	Col.0	TRUE	26.8961	1.20817	0.274447	4.40219	1.07164e-05	0.000144147
AT1G19380	Col.0	TRUE	30.3963	-1.20796	0.298887	-4.04153	5.31043e-05	0.000587109
AT1G07090	Col.0	TRUE	57.7869	-1.20788	0.261451	-4.6199	3.83927e-06	5.80416e-05
AT5G06530	Col.0	TRUE	847.082	1.20507	0.136513	8.82754	1.07007e-18	9.38117e-17
AT4G38420	Col.0	TRUE	298.108	-1.20499	0.239601	-5.02914	4.92672e-07	9.16328e-06
AT5G16530	Col.0	TRUE	57.2398	-1.20469	0.376109	-3.20303	0.00135988	0.0092313
AT4G01630	Col.0	TRUE	85.0071	1.20379	0.431329	2.79089	0.00525638	0.0275136
AT3G47510	Col.0	TRUE	35.8161	1.20177	0.255015	4.71254	2.44644e-06	3.89776e-05
AT5G49740	Col.0	TRUE	220.738	-1.2017	0.275172	-4.36708	1.25918e-05	0.000166261
AT4G35560	Col.0	TRUE	151.733	1.20055	0.132576	9.05556	1.3587e-19	1.26085e-17
AT1G04770	Col.0	TRUE	211.984	1.19994	0.143598	8.35621	6.47661e-17	5.02182e-15
AT2G45470	Col.0	TRUE	2696.63	-1.19987	0.246702	-4.86365	1.15238e-06	2.00243e-05
AT4G16146	Col.0	TRUE	29.7426	1.19941	0.269189	4.45564	8.36415e-06	0.000116179
AT5G54300	Col.0	TRUE	119.66	1.19884	0.277583	4.31884	1.56848e-05	0.000201204
AT3G10520	Col.0	TRUE	71.1274	-1.19871	0.187547	-6.3915	1.64271e-10	5.7089e-09
AT3G48100	Col.0	TRUE	65.8452	-1.19788	0.227778	-5.25899	1.44851e-07	2.99415e-06
AT5G08020	Col.0	TRUE	56.0636	-1.19703	0.222259	-5.38574	7.21456e-08	1.59525e-06
AT4G13800	Col.0	TRUE	261.391	1.1959	0.163315	7.32266	2.43108e-13	1.24377e-11
AT1G10480	Col.0	TRUE	31.0608	1.19534	0.254614	4.6947	2.66998e-06	4.21162e-05
AT5G62520	Col.0	TRUE	39.5426	1.19481	0.244095	4.89485	9.83826e-07	1.72848e-05
AT1G17020	Col.0	TRUE	39.7966	1.19328	0.238208	5.00941	5.45968e-07	1.00368e-05
AT2G22200	Col.0	TRUE	63.6929	1.19193	0.193994	6.14416	8.0387e-10	2.55918e-08
AT1G79310	Col.0	TRUE	22.8028	-1.19158	0.284959	-4.18159	2.89475e-05	0.000343316
AT5G16360	Col.0	TRUE	57.6165	1.19153	0.199157	5.98286	2.19247e-09	6.50506e-08
AT5G64430	Col.0	TRUE	251.827	1.19091	0.146132	8.14955	3.65293e-16	2.64436e-14
AT2G42980	Col.0	TRUE	28.7427	1.18958	0.365295	3.2565	0.00112794	0.00790022
AT5G42050	Col.0	TRUE	614.135	1.18853	0.144671	8.21539	2.11476e-16	1.56331e-14
AT1G51840	Col.0	TRUE	134.623	-1.1877	0.273932	-4.33574	1.45271e-05	0.000188432
AT2G16720	Col.0	TRUE	44.856	1.18734	0.220654	5.38098	7.40818e-08	1.63599e-06
AT5G51550	Col.0	TRUE	531.086	-1.1858	0.230435	-5.14592	2.66219e-07	5.25987e-06
AT1G12845	Col.0	TRUE	74.892	1.18547	0.203197	5.8341	5.40805e-09	1.50237e-07
AT1G11450	Col.0	TRUE	54.1063	-1.18481	0.298592	-3.96799	7.24825e-05	0.000766846
AT4G14746	Col.0	TRUE	159.902	1.18445	0.20359	5.81784	5.96121e-09	1.62753e-07
AT1G51830	Col.0	TRUE	276.407	-1.18404	0.299989	-3.94694	7.91572e-05	0.000828917
AT2G30140	Col.0	TRUE	424.031	1.18389	0.147853	8.00721	1.17338e-15	8.15572e-14
AT5G44635	Col.0	TRUE	93.9987	-1.1837	0.19462	-6.0821	1.18618e-09	3.71965e-08
AT3G44540	Col.0	TRUE	113.174	1.183	0.229324	5.15864	2.48747e-07	4.95393e-06
AT1G79970	Col.0	TRUE	602.995	1.18253	0.118736	9.95929	2.29706e-23	2.99063e-21
AT1G68620	Col.0	TRUE	157.286	1.1811	0.140691	8.39501	4.65862e-17	3.661e-15
AT1G11210	Col.0	TRUE	21.9611	1.18057	0.336021	3.51339	0.000442427	0.00363847
AT1G27670	Col.0	TRUE	16.6283	1.17982	0.358936	3.287	0.00101261	0.00721359
AT4G32920	Col.0	TRUE	1805.55	1.17952	0.20877	5.64986	1.60575e-08	4.08367e-07
AT3G09770	Col.0	TRUE	732.163	1.17945	0.113234	10.4161	2.09447e-25	3.20528e-23
AT4G33040	Col.0	TRUE	52.9291	1.17897	0.233011	5.05974	4.19837e-07	7.96139e-06
AT1G14430	Col.0	TRUE	56.194	-1.1783	0.260683	-4.52007	6.1819e-06	8.93533e-05
AT4G39330	Col.0	TRUE	3431.34	1.17505	0.0990276	11.8659	1.78064e-32	3.88312e-30
AT4G17840	Col.0	TRUE	1113.55	1.17479	0.0945741	12.4219	1.98755e-35	5.50393e-33
AT2G41210	Col.0	TRUE	110.869	1.17422	0.179194	6.55276	5.64815e-11	2.1055e-09
AT3G17000	Col.0	TRUE	394.259	1.17355	0.117378	9.99809	1.5537e-23	2.08507e-21
AT1G73500	Col.0	TRUE	126.225	1.17108	0.203222	5.76256	8.28458e-09	2.20661e-07
AT5G63600	Col.0	TRUE	648.355	-1.171	0.151563	-7.72618	1.10825e-14	6.69017e-13
AT5G49730	Col.0	TRUE	284.351	-1.17053	0.235741	-4.96533	6.85853e-07	1.24251e-05
AT4G27652	Col.0	TRUE	29.8096	1.16907	0.289065	4.04433	5.2474e-05	0.000580876
AT3G18950	Col.0	TRUE	97.672	1.1684	0.16713	6.99094	2.73048e-12	1.26691e-10
AT2G42260	Col.0	TRUE	21.5775	-1.16794	0.33289	-3.50847	0.00045069	0.00369142
AT4G29740	Col.0	TRUE	46.1567	-1.16393	0.359823	-3.23472	0.00121761	0.00843288
AT3G14310	Col.0	TRUE	1553.88	-1.16339	0.266482	-4.36572	1.26706e-05	0.000167001
AT5G17850	Col.0	TRUE	125.026	1.16218	0.205436	5.65714	1.5392e-08	3.92586e-07
AT3G12110	Col.0	TRUE	120.094	-1.1619	0.202492	-5.73799	9.58077e-09	2.52487e-07
AT1G73880	Col.0	TRUE	155.095	1.16162	0.141662	8.19998	2.40429e-16	1.76984e-14
AT3G63110	Col.0	TRUE	84.326	-1.16094	0.239819	-4.84089	1.29261e-06	2.21304e-05
AT2G36750	Col.0	TRUE	56.7984	1.16074	0.229576	5.05602	4.28098e-07	8.06544e-06
AT5G12920	Col.0	TRUE	21.4032	-1.1601	0.310326	-3.73832	0.000185256	0.00172833
AT1G15460	Col.0	TRUE	33.2445	1.15992	0.296183	3.91623	8.99439e-05	0.000924667
AT3G44860	Col.0	TRUE	37.2878	1.15975	0.369344	3.14003	0.00168932	0.0110052
AT5G61000	Col.0	TRUE	92.3778	-1.15816	0.174852	-6.62365	3.50433e-11	1.34959e-09
AT2G37760	Col.0	TRUE	351.204	1.15806	0.124203	9.32394	1.121e-20	1.17107e-18
AT2G43120	Col.0	TRUE	35.8139	-1.15723	0.255461	-4.52996	5.89951e-06	8.55552e-05
AT3G19270	Col.0	TRUE	43.5866	1.15699	0.27758	4.16812	3.07124e-05	0.000362033
AT3G55940	Col.0	TRUE	52.9293	1.15676	0.207643	5.5709	2.53423e-08	6.20088e-07
AT5G51950	Col.0	TRUE	31.9201	1.15609	0.286561	4.03437	5.47482e-05	0.000601093
AT3G04070	Col.0	TRUE	77.5772	1.15604	0.190451	6.07001	1.27902e-09	3.99172e-08
AT1G04180	Col.0	TRUE	27.7717	1.15596	0.260742	4.43336	9.27754e-06	0.000126747
AT3G43190	Col.0	TRUE	31.9938	1.15556	0.261161	4.42472	9.65671e-06	0.00013131
AT1G64940	Col.0	TRUE	78.2649	1.15535	0.316959	3.6451	0.000267285	0.00237668
AT1G23800	Col.0	TRUE	537.445	1.15513	0.146529	7.88327	3.18916e-15	2.09166e-13
AT4G35810	Col.0	TRUE	22.2028	-1.1547	0.296454	-3.89502	9.81894e-05	0.000996516
AT1G78070	Col.0	TRUE	924.189	1.15439	0.12088	9.54986	1.29868e-21	1.46173e-19
AT2G37460	Col.0	TRUE	117.052	-1.15357	0.253988	-4.54184	5.57666e-06	8.13465e-05
AT2G34500	Col.0	TRUE	204.428	1.15289	0.24789	4.65081	3.30633e-06	5.10914e-05
AT5G10946	Col.0	TRUE	42.9221	1.15288	0.280578	4.10892	3.97507e-05	0.000453262
AT2G09190	Col.0	TRUE	14.9249	1.15265	0.40987	2.81222	0.0049201	0.0261615
AT3G29250	Col.0	TRUE	232.949	-1.15126	0.212094	-5.42807	5.69663e-08	1.28237e-06
AT5G54080	Col.0	TRUE	156.701	1.15104	0.145268	7.92352	2.30882e-15	1.54922e-13
AT5G65690	Col.0	TRUE	46.558	-1.15089	0.23097	-4.98288	6.26463e-07	1.14323e-05
AT4G25433	Col.0	TRUE	28.8534	1.15084	0.399787	2.87863	0.00399412	0.0221774
AT1G08500	Col.0	TRUE	47.4556	1.14994	0.270861	4.24551	2.18099e-05	0.000269855
AT3G58990	Col.0	TRUE	452.062	-1.14844	0.15434	-7.44098	9.99388e-14	5.29949e-12
AT4G02830	Col.0	TRUE	21.9132	1.14818	0.288587	3.97862	6.93167e-05	0.000736928
AT4G33970	Col.0	TRUE	15.2715	1.14651	0.363357	3.15533	0.00160316	0.0105702
AT5G19875	Col.0	TRUE	89.3504	1.14585	0.211856	5.40862	6.35113e-08	1.4169e-06
AT3G24300	Col.0	TRUE	416.142	-1.14564	0.264661	-4.32871	1.49986e-05	0.000193386
AT2G23600	Col.0	TRUE	310.762	-1.14344	0.221337	-5.16605	2.39093e-07	4.7671e-06
AT5G49630	Col.0	TRUE	75.4404	-1.14289	0.343233	-3.32979	0.000869117	0.00635216
AT5G50240	Col.0	TRUE	33.842	1.13936	0.235169	4.84487	1.26695e-06	2.17337e-05
AT2G19590	Col.0	TRUE	27.0569	-1.13906	0.271208	-4.19995	2.66972e-05	0.00031989
AT1G21790	Col.0	TRUE	223.39	1.13873	0.119114	9.55995	1.17811e-21	1.34335e-19
AT3G16360	Col.0	TRUE	30.9159	1.13831	0.344322	3.30595	0.000946551	0.00684074
AT5G60360	Col.0	TRUE	2478.68	1.13831	0.244239	4.66064	3.1523e-06	4.89716e-05
AT3G19440	Col.0	TRUE	51.6633	-1.13688	0.261275	-4.35126	1.35355e-05	0.000176996
AT5G17450	Col.0	TRUE	50.4384	1.13611	0.335832	3.38296	0.000717083	0.00542508
AT3G10020	Col.0	TRUE	206.219	1.13542	0.335119	3.38811	0.000703767	0.0053452
AT5G46900	Col.0	TRUE	106.704	-1.13465	0.233653	-4.85613	1.19703e-06	2.06179e-05
AT1G21050	Col.0	TRUE	143.073	-1.13404	0.173834	-6.5237	6.8594e-11	2.50879e-09
AT4G28310	Col.0	TRUE	41.2016	-1.13264	0.274596	-4.12474	3.71147e-05	0.000426832
AT4G06534	Col.0	TRUE	170.326	1.13232	0.172934	6.5477	5.84282e-11	2.15962e-09
AT2G21050	Col.0	TRUE	235.869	-1.13184	0.265872	-4.25708	2.07117e-05	0.000258097
AT5G53250	Col.0	TRUE	121.274	-1.13148	0.281918	-4.0135	5.98249e-05	0.000649879
AT4G39210	Col.0	TRUE	469.11	1.13079	0.187607	6.02745	1.66571e-09	5.08931e-08
AT1G73680	Col.0	TRUE	303.729	1.13078	0.26675	4.23911	2.24404e-05	0.000275878
AT3G63210	Col.0	TRUE	416.007	1.12939	0.177447	6.36467	1.95705e-10	6.70781e-09
AT1G56430	Col.0	TRUE	98.0173	-1.12916	0.161473	-6.99289	2.69286e-12	1.25279e-10
AT5G60520	Col.0	TRUE	62.1393	1.12768	0.419195	2.69011	0.00714283	0.0350531
AT3G61630	Col.0	TRUE	102.27	1.12722	0.195255	5.77305	7.78498e-09	2.08628e-07
AT5G66960	Col.0	TRUE	36.1605	-1.12712	0.229376	-4.91385	8.93062e-07	1.58498e-05
AT1G28960	Col.0	TRUE	307.271	1.12667	0.12043	9.35541	8.32736e-21	8.96784e-19
AT2G19800	Col.0	TRUE	65.0493	-1.12661	0.279494	-4.03088	5.55689e-05	0.000609337
AT5G23220	Col.0	TRUE	164.981	1.12657	0.17144	6.57122	4.99055e-11	1.8764e-09
AT1G63820	Col.0	TRUE	27.3002	1.12631	0.275636	4.08623	4.38431e-05	0.000494969
AT5G25970	Col.0	TRUE	21.7226	-1.12575	0.292549	-3.84808	0.000119049	0.00118141
AT2G06850	Col.0	TRUE	954.431	-1.1252	0.21778	-5.16667	2.383e-07	4.76219e-06
AT3G14740	Col.0	TRUE	54.9499	-1.12448	0.242659	-4.63398	3.58705e-06	5.46548e-05
AT4G25690	Col.0	TRUE	185.139	1.12436	0.152445	7.37555	1.6367e-13	8.54907e-12
AT5G54585	Col.0	TRUE	76.4218	1.12351	0.248862	4.51459	6.34393e-06	9.13924e-05
AT2G31083	Col.0	TRUE	32.2725	1.12348	0.27036	4.15548	3.24603e-05	0.000379304
AT5G23840	Col.0	TRUE	35.8773	-1.12331	0.296483	-3.7888	0.000151376	0.00146068
AT5G22880	Col.0	TRUE	259.972	-1.12313	0.264185	-4.25128	2.1255e-05	0.000263738
AT4G15910	Col.0	TRUE	331.937	1.12248	0.252459	4.44619	8.7405e-06	0.000120829
AT5G38930	Col.0	TRUE	34.5246	-1.12179	0.265832	-4.2199	2.44408e-05	0.000296313
AT1G17550	Col.0	TRUE	622.823	1.12145	0.104047	10.7784	4.35629e-27	7.10278e-25
AT3G21330	Col.0	TRUE	27.4604	-1.12135	0.352177	-3.18406	0.00145223	0.00973697
AT4G25090	Col.0	TRUE	62.4139	-1.12047	0.262015	-4.27635	1.8998e-05	0.000239011
AT3G02820	Col.0	TRUE	17.7599	-1.11941	0.351824	-3.18172	0.00146405	0.00980114
AT2G34060	Col.0	TRUE	61.7249	-1.1193	0.217247	-5.15221	2.57441e-07	5.09797e-06
AT4G01680	Col.0	TRUE	31.8391	-1.11913	0.285655	-3.91776	8.93767e-05	0.000919921
AT4G24130	Col.0	TRUE	167.16	1.119	0.185981	6.01672	1.7799e-09	5.38166e-08
AT2G44740	Col.0	TRUE	19.5343	-1.11894	0.315635	-3.54505	0.000392545	0.00329406
AT5G22860	Col.0	TRUE	228.324	1.11862	0.268886	4.16021	3.17959e-05	0.00037279
AT1G65490	Col.0	TRUE	47.9724	-1.11833	0.264059	-4.23516	2.28386e-05	0.000280199
AT4G37240	Col.0	TRUE	43.4348	-1.11821	0.311888	-3.58529	0.000336702	0.0028908
AT3G55880	Col.0	TRUE	121.755	1.11812	0.226946	4.92681	8.35821e-07	1.48641e-05
AT3G14840	Col.0	TRUE	560.982	-1.11769	0.239064	-4.67529	2.93539e-06	4.59702e-05
AT3G16690	Col.0	TRUE	69.7769	-1.11728	0.237535	-4.70364	2.55569e-06	4.06071e-05
AT1G22370	Col.0	TRUE	100.398	1.11708	0.20186	5.53392	3.13154e-08	7.50452e-07
AT5G48070	Col.0	TRUE	61.3672	-1.117	0.26689	-4.18523	2.84883e-05	0.00033833
AT4G25630	Col.0	TRUE	387.334	-1.11696	0.259265	-4.30816	1.64618e-05	0.000209324
AT1G02970	Col.0	TRUE	21.8313	-1.11468	0.33341	-3.34328	0.000827955	0.0060973
AT1G31770	Col.0	TRUE	347.609	-1.11371	0.231264	-4.81576	1.46639e-06	2.48375e-05
AT4G12520	Col.0	TRUE	32.5018	-1.11368	0.245133	-4.54316	5.54176e-06	8.10407e-05
AT4G27830	Col.0	TRUE	589.671	1.11239	0.267736	4.15479	3.25583e-05	0.000380196
AT1G63420	Col.0	TRUE	148.937	1.10976	0.203439	5.45501	4.89689e-08	1.11675e-06
AT3G13150	Col.0	TRUE	56.5821	-1.10949	0.217411	-5.1032	3.3395e-07	6.48064e-06
AT3G03650	Col.0	TRUE	17.1472	1.10935	0.399947	2.77374	0.00554161	0.0287137
AT3G05150	Col.0	TRUE	26.952	-1.10815	0.286182	-3.8722	0.000107856	0.00108266
AT3G61160	Col.0	TRUE	24.9747	1.10804	0.301546	3.67455	0.000238273	0.00216383
AT2G07690	Col.0	TRUE	177.312	-1.10768	0.155977	-7.10155	1.23361e-12	5.90325e-11
AT3G45710	Col.0	TRUE	180.284	-1.1069	0.30469	-3.63286	0.000280296	0.00246848
AT5G27150	Col.0	TRUE	1525.24	1.10642	0.215023	5.14558	2.66701e-07	5.26343e-06
AT2G02020	Col.0	TRUE	55.9237	-1.10609	0.198169	-5.58156	2.38365e-08	5.88192e-07
AT2G34070	Col.0	TRUE	325.533	1.10508	0.195911	5.64072	1.69337e-08	4.27852e-07
AT5G47610	Col.0	TRUE	149.234	1.10369	0.20203	5.46301	4.68131e-08	1.07282e-06
AT1G13650	Col.0	TRUE	157.527	-1.10349	0.20857	-5.29075	1.21813e-07	2.55733e-06
AT4G07625	Col.0	TRUE	19.6312	-1.10263	0.319339	-3.45286	0.000554682	0.00438667
AT1G15520	Col.0	TRUE	69.2835	1.10263	0.266756	4.13346	3.57341e-05	0.00041235
AT5G09840	Col.0	TRUE	97.8668	-1.10251	0.212548	-5.18708	2.13618e-07	4.3016e-06
AT2G30930	Col.0	TRUE	206.352	-1.10185	0.192461	-5.72504	1.03408e-08	2.71286e-07
AT1G32870	Col.0	TRUE	145.461	1.10178	0.162952	6.76137	1.36697e-11	5.59816e-10
AT5G19410	Col.0	TRUE	91.0952	1.10171	0.21815	5.05023	4.41288e-07	8.29603e-06
AT5G03490	Col.0	TRUE	168.523	1.10138	0.188963	5.82856	5.59091e-09	1.5409e-07
AT5G23420	Col.0	TRUE	58.0983	-1.10059	0.207041	-5.31579	1.06195e-07	2.26489e-06
AT5G24800	Col.0	TRUE	117.09	1.09996	0.185556	5.92791	3.06817e-09	8.90638e-08
AT5G67140	Col.0	TRUE	40.5945	1.09995	0.236935	4.64242	3.44345e-06	5.2836e-05
AT4G06010	Col.0	TRUE	91.7481	-1.09982	0.31587	-3.48189	0.000497886	0.00401022
AT1G17830	Col.0	TRUE	107.968	1.09917	0.182377	6.0269	1.6713e-09	5.09747e-08
AT4G30280	Col.0	TRUE	151.828	-1.09728	0.31939	-3.43555	0.000591346	0.0046295
AT3G57760	Col.0	TRUE	29.5361	1.09721	0.259105	4.2346	2.2896e-05	0.000280311
AT4G34860	Col.0	TRUE	147.307	1.09664	0.180386	6.07941	1.20624e-09	3.77135e-08
AT3G03440	Col.0	TRUE	141.339	1.09593	0.136241	8.04407	8.69006e-16	6.08862e-14
AT3G30775	Col.0	TRUE	385.263	-1.09567	0.1147	-9.55248	1.26625e-21	1.43448e-19
AT1G69295	Col.0	TRUE	697.537	1.09456	0.175636	6.23199	4.6054e-10	1.50743e-08
AT5G10390	Col.0	TRUE	57.4354	-1.09424	0.284284	-3.84911	0.000118548	0.00117779
AT1G02810	Col.0	TRUE	79.0342	-1.09355	0.24759	-4.41677	1.00189e-05	0.000135286
AT4G19380	Col.0	TRUE	117.649	-1.0933	0.2744	-3.98433	6.7672e-05	0.000721641
AT3G46450	Col.0	TRUE	372.76	1.09304	0.181553	6.02046	1.7392e-09	5.26771e-08
AT5G26340	Col.0	TRUE	500.592	1.09237	0.323221	3.37964	0.000725816	0.00547927
AT5G45340	Col.0	TRUE	120.547	1.09188	0.333913	3.26994	0.00107569	0.00760392
AT5G38430	Col.0	TRUE	2135.53	-1.09125	0.186058	-5.86508	4.48915e-09	1.26933e-07
AT1G70850	Col.0	TRUE	1332.15	-1.09116	0.157083	-6.94636	3.74828e-12	1.65551e-10
AT5G08030	Col.0	TRUE	36.2958	-1.09111	0.331328	-3.29315	0.000990711	0.00709522
AT3G26050	Col.0	TRUE	18.8276	-1.0901	0.321046	-3.39545	0.000685152	0.00523573
AT4G04570	Col.0	TRUE	252.597	-1.0897	0.225496	-4.83248	1.34845e-06	2.29962e-05
AT1G26800	Col.0	TRUE	53.5179	1.089	0.269197	4.04535	5.2245e-05	0.000578709
AT4G16750	Col.0	TRUE	56.7974	1.08885	0.198213	5.4933	3.94484e-08	9.23182e-07
AT4G01870	Col.0	TRUE	978.716	1.08853	0.166204	6.54936	5.77828e-11	2.14485e-09
AT4G31360	Col.0	TRUE	33.615	-1.08724	0.254615	-4.27012	1.95368e-05	0.000245032
AT3G54680	Col.0	TRUE	181.993	1.08719	0.16805	6.46944	9.83682e-11	3.52212e-09
AT4G38730	Col.0	TRUE	177.376	1.08636	0.168917	6.4313	1.2652e-10	4.45914e-09
AT2G27660	Col.0	TRUE	177.818	-1.0854	0.145029	-7.48404	7.20702e-14	3.94785e-12
AT2G41312	Col.0	TRUE	55.2132	1.08506	0.272444	3.9827	6.81376e-05	0.000726163
AT1G77630	Col.0	TRUE	124.93	-1.0847	0.240861	-4.50344	6.6862e-06	9.57892e-05
AT5G66590	Col.0	TRUE	65.89	-1.08441	0.235983	-4.59527	4.32179e-06	6.42779e-05
AT5G26146	Col.0	TRUE	39.1014	1.08417	0.268437	4.03883	5.3719e-05	0.000592778
AT5G43080	Col.0	TRUE	17.8663	-1.08395	0.337383	-3.21281	0.00131442	0.00898915
AT5G49900	Col.0	TRUE	167.397	1.08274	0.139047	7.78682	6.87156e-15	4.26722e-13
AT1G27150	Col.0	TRUE	248.721	1.08237	0.130637	8.28527	1.17843e-16	8.89998e-15
AT4G11220	Col.0	TRUE	479.239	1.08128	0.183178	5.90289	3.57178e-09	1.02153e-07
AT4G28430	Col.0	TRUE	20.5626	-1.08098	0.317979	-3.39954	0.000675002	0.00517175
AT3G44750	Col.0	TRUE	144.982	-1.08071	0.224725	-4.80904	1.51654e-06	2.55136e-05
AT3G02120	Col.0	TRUE	48.3547	-1.08066	0.366167	-2.95129	0.00316452	0.018399
AT5G48412	Col.0	TRUE	167.96	1.07961	0.197191	5.47494	4.37665e-08	1.01132e-06
AT1G04040	Col.0	TRUE	271.491	-1.07922	0.189213	-5.70371	1.17229e-08	3.04343e-07
AT4G16190	Col.0	TRUE	2647.8	1.07859	0.234578	4.59798	4.26606e-06	6.36661e-05
AT4G17490	Col.0	TRUE	17.2734	-1.07739	0.340145	-3.16743	0.00153793	0.0102306
AT5G54040	Col.0	TRUE	50.5455	-1.07429	0.283931	-3.78364	0.000154554	0.00148477
AT4G22240	Col.0	TRUE	1258.45	1.07349	0.122492	8.76373	1.88888e-18	1.63135e-16
AT1G52750	Col.0	TRUE	87.9569	-1.07318	0.253164	-4.23907	2.24452e-05	0.000275878
AT2G05540	Col.0	TRUE	605.15	1.073	0.194269	5.52325	3.32777e-08	7.92037e-07
AT5G15290	Col.0	TRUE	32.8507	1.07251	0.340583	3.14905	0.00163801	0.010723
AT4G30490	Col.0	TRUE	230.554	1.07235	0.154825	6.92619	4.32326e-12	1.89984e-10
AT2G41660	Col.0	TRUE	489.866	1.0722	0.115528	9.28087	1.68105e-20	1.71507e-18
AT2G27550	Col.0	TRUE	125.64	1.07218	0.294552	3.64004	0.000272595	0.00241651
AT4G17810	Col.0	TRUE	85.4077	-1.07155	0.243264	-4.40489	1.05839e-05	0.00014258
AT4G02060	Col.0	TRUE	236.43	-1.0708	0.189619	-5.64712	1.6316e-08	4.14337e-07
AT4G32940	Col.0	TRUE	811.376	1.07019	0.252133	4.24453	2.19052e-05	0.00027075
AT2G29300	Col.0	TRUE	42.6642	1.07001	0.291998	3.66443	0.000247889	0.00223151
AT1G51090	Col.0	TRUE	80.0468	1.06992	0.201112	5.32003	1.03751e-07	2.21548e-06
AT3G23730	Col.0	TRUE	219.04	-1.06883	0.344937	-3.09862	0.00194424	0.0123163
AT4G02005	Col.0	TRUE	68.8234	1.06796	0.245531	4.34959	1.3639e-05	0.00017797
AT3G47295	Col.0	TRUE	54.7597	1.06781	0.240073	4.44784	8.67361e-06	0.00012
AT1G22930	Col.0	TRUE	1146.92	1.0677	0.182652	5.84551	5.05014e-09	1.41284e-07
AT3G15350	Col.0	TRUE	433.79	1.06718	0.244527	4.36426	1.27556e-05	0.000167824
AT4G12470	Col.0	TRUE	119.315	-1.06713	0.378122	-2.82219	0.00476962	0.0254857
AT4G21990	Col.0	TRUE	2012.12	1.0668	0.108429	9.83863	7.67454e-23	9.42887e-21
AT5G03190	Col.0	TRUE	278.422	1.06674	0.142986	7.46044	8.62321e-14	4.61474e-12
AT1G14210	Col.0	TRUE	78.4279	-1.06673	0.183297	-5.81967	5.89638e-09	1.61236e-07
AT4G21830	Col.0	TRUE	54.4609	-1.06542	0.302917	-3.51719	0.000436139	0.00359418
AT2G33060	Col.0	TRUE	139.771	1.06536	0.135673	7.85236	4.08276e-15	2.63807e-13
AT5G57780	Col.0	TRUE	26.6703	-1.0653	0.276487	-3.853	0.000116679	0.00116186
AT1G17745	Col.0	TRUE	625.172	1.06524	0.186985	5.69696	1.21964e-08	3.15694e-07
AT1G14540	Col.0	TRUE	71.2167	-1.0637	0.320428	-3.31963	0.000901358	0.00655212
AT1G18710	Col.0	TRUE	65.9758	1.0635	0.198997	5.34427	9.0781e-08	1.95285e-06
AT1G02400	Col.0	TRUE	100.402	1.06292	0.227696	4.66817	3.039e-06	4.74649e-05
AT3G19290	Col.0	TRUE	258.197	1.06064	0.169118	6.27163	3.57278e-10	1.19179e-08
AT5G25110	Col.0	TRUE	80.1226	1.06007	0.195338	5.42685	5.73566e-08	1.28949e-06
AT3G06520	Col.0	TRUE	24.651	1.05964	0.291184	3.63907	0.00027362	0.00242233
AT2G01310	Col.0	TRUE	91.6584	-1.05948	0.361097	-2.93407	0.0033455	0.0192471
AT1G63260	Col.0	TRUE	66.4738	-1.05881	0.256158	-4.13344	3.57374e-05	0.00041235
AT5G20270	Col.0	TRUE	812.823	1.05819	0.257658	4.10696	4.00898e-05	0.00045683
AT1G80920	Col.0	TRUE	381.601	1.0572	0.305087	3.46525	0.000529736	0.00422344
AT5G38340	Col.0	TRUE	37.5775	-1.05697	0.348358	-3.03416	0.00241207	0.0147394
AT3G25717	Col.0	TRUE	70.7763	-1.0567	0.233701	-4.52161	6.13709e-06	8.87792e-05
AT3G49580	Col.0	TRUE	57.2093	1.05646	0.222527	4.74759	2.05855e-06	3.3439e-05
AT3G25190	Col.0	TRUE	36.076	-1.05584	0.241646	-4.36935	1.24614e-05	0.000164823
AT2G37150	Col.0	TRUE	198.269	1.05541	0.135477	7.79034	6.68309e-15	4.18118e-13
AT1G20010	Col.0	TRUE	687.723	-1.05348	0.189624	-5.55564	2.76596e-08	6.69279e-07
AT4G17650	Col.0	TRUE	190.943	1.05346	0.189921	5.54685	2.90857e-08	6.99902e-07
AT2G45220	Col.0	TRUE	416.224	1.05236	0.34505	3.04988	0.00228934	0.014128
AT4G05200	Col.0	TRUE	49.3082	-1.05145	0.353489	-2.97448	0.00293487	0.017333
AT4G06536	Col.0	TRUE	45.5451	1.05109	0.283582	3.70649	0.000210152	0.00194088
AT3G57380	Col.0	TRUE	26.1899	1.05048	0.351829	2.98576	0.00282877	0.0168125
AT4G12005	Col.0	TRUE	28.3381	1.0499	0.29407	3.57022	0.000356676	0.0030354
AT2G04570	Col.0	TRUE	764.151	1.04915	0.233483	4.49348	7.00684e-06	9.98704e-05
AT2G25460	Col.0	TRUE	113.531	1.04874	0.174527	6.00903	1.86634e-09	5.59453e-08
AT2G37380	Col.0	TRUE	37.8632	-1.0481	0.300666	-3.48593	0.000490438	0.00396855
AT4G16700	Col.0	TRUE	30.9578	-1.0477	0.251489	-4.16598	3.10017e-05	0.00036495
AT3G14595	Col.0	TRUE	210.216	1.04709	0.225379	4.6459	3.3859e-06	5.20903e-05
AT1G10020	Col.0	TRUE	258.794	-1.04666	0.136861	-7.64766	2.04674e-14	1.20633e-12
AT5G54240	Col.0	TRUE	30.9487	1.04642	0.265484	3.94154	8.09589e-05	0.000844742
AT1G28330	Col.0	TRUE	161.622	1.04588	0.285687	3.66092	0.00025131	0.00225881
AT3G43270	Col.0	TRUE	383.076	1.04586	0.317798	3.29098	0.000998406	0.00713471
AT5G19770	Col.0	TRUE	713.59	-1.04584	0.131409	-7.9587	1.73855e-15	1.17561e-13
AT3G15850	Col.0	TRUE	1030.58	-1.04572	0.152143	-6.87329	6.2739e-12	2.70258e-10
AT2G38640	Col.0	TRUE	33.691	1.04563	0.257073	4.06745	4.75307e-05	0.000532234
AT3G05820	Col.0	TRUE	18.9162	1.04532	0.353178	2.95976	0.00307874	0.0179758
AT4G05020	Col.0	TRUE	605.998	1.04505	0.134055	7.79568	6.40644e-15	4.0349e-13
AT1G52290	Col.0	TRUE	76.0141	-1.04326	0.208695	-4.99898	5.76351e-07	1.0562e-05
AT2G14520	Col.0	TRUE	50.1088	1.04267	0.247423	4.21414	2.5073e-05	0.000302925
AT3G47790	Col.0	TRUE	108.669	1.04215	0.202893	5.13646	2.79968e-07	5.50037e-06
AT2G41410	Col.0	TRUE	963.737	1.04187	0.154084	6.7617	1.36386e-11	5.59816e-10
AT5G20630	Col.0	TRUE	684.432	-1.04029	0.252483	-4.12022	3.78507e-05	0.000434061
AT3G21150	Col.0	TRUE	35.7731	1.04002	0.295596	3.51839	0.000434168	0.00358811
AT1G09490	Col.0	TRUE	136.43	1.03963	0.168724	6.16171	7.19624e-10	2.30783e-08
AT3G44550	Col.0	TRUE	114.984	1.03934	0.15731	6.60693	3.92384e-11	1.49793e-09
AT3G01990	Col.0	TRUE	19.5829	1.03926	0.309932	3.35318	0.000798895	0.0059233
AT1G60750	Col.0	TRUE	38.5144	1.0387	0.256301	4.05267	5.06369e-05	0.000564038
AT5G64620	Col.0	TRUE	87.4057	-1.03648	0.265927	-3.8976	9.71497e-05	0.000986539
AT3G61210	Col.0	TRUE	36.6513	-1.03648	0.362307	-2.86077	0.00422617	0.0232147
AT3G26330	Col.0	TRUE	103.878	-1.03555	0.262553	-3.94416	8.00811e-05	0.000836584
AT2G23130	Col.0	TRUE	452.833	-1.03532	0.196407	-5.27128	1.35476e-07	2.81705e-06
AT1G62180	Col.0	TRUE	680.957	1.03526	0.103673	9.98586	1.75769e-23	2.32308e-21
AT3G58120	Col.0	TRUE	330.528	-1.03496	0.144688	-7.15305	8.48697e-13	4.11288e-11
AT1G14190	Col.0	TRUE	18.193	-1.03262	0.364426	-2.83354	0.00460352	0.0247727
AT5G15350	Col.0	TRUE	396.434	-1.03194	0.148148	-6.96561	3.26983e-12	1.47024e-10
AT5G18270	Col.0	TRUE	135.631	1.03174	0.187656	5.49803	3.84063e-08	9.01798e-07
AT5G56520	Col.0	TRUE	76.645	1.03151	0.1881	5.48383	4.16207e-08	9.66865e-07
AT5G57610	Col.0	TRUE	931.582	1.03117	0.0951483	10.8375	2.28614e-27	3.835e-25
AT1G68530	Col.0	TRUE	8856.94	1.02989	0.256148	4.02069	5.80291e-05	0.000633527
AT2G21045	Col.0	TRUE	118.345	-1.02899	0.204702	-5.02676	4.98831e-07	9.23844e-06
AT3G15300	Col.0	TRUE	37.2944	1.02863	0.257327	3.99736	6.4054e-05	0.000686838
AT4G32535	Col.0	TRUE	21.7008	1.02792	0.286595	3.58665	0.000334956	0.00288056
AT1G67630	Col.0	TRUE	111.346	-1.02525	0.189756	-5.403	6.55361e-08	1.46021e-06
AT4G35300	Col.0	TRUE	1032.62	1.02506	0.270962	3.78304	0.000154923	0.0014875
AT2G18700	Col.0	TRUE	585.29	1.02467	0.254291	4.0295	5.58968e-05	0.000612162
AT5G06570	Col.0	TRUE	28.3791	-1.02452	0.298105	-3.43679	0.000588648	0.00461139
AT1G08650	Col.0	TRUE	388.843	1.02449	0.136155	7.52444	5.29485e-14	2.98945e-12
AT5G15970	Col.0	TRUE	2255.18	1.02336	0.271697	3.76654	0.000165528	0.00157202
AT3G01100	Col.0	TRUE	441.915	1.02322	0.263262	3.88668	0.000101623	0.00102897
AT5G20400	Col.0	TRUE	58.779	-1.02318	0.262169	-3.90273	9.51138e-05	0.000968119
AT4G01550	Col.0	TRUE	75.1931	1.02314	0.211946	4.82735	1.3836e-06	2.35267e-05
AT5G50100	Col.0	TRUE	205.118	1.0229	0.157439	6.49714	8.18604e-11	2.95069e-09
AT2G19060	Col.0	TRUE	33.9416	-1.02252	0.303403	-3.37015	0.000751261	0.00564449
AT4G18205	Col.0	TRUE	32.9967	-1.02248	0.344811	-2.96532	0.00302366	0.0177076
AT2G21080	Col.0	TRUE	95.5138	-1.02213	0.214467	-4.76592	1.8799e-06	3.09769e-05
AT2G40475	Col.0	TRUE	282.922	1.0221	0.137617	7.42717	1.10949e-13	5.86553e-12
AT1G33811	Col.0	TRUE	251.863	-1.01997	0.280749	-3.63302	0.000280127	0.00246823
AT3G48460	Col.0	TRUE	774.431	1.01995	0.245158	4.16036	3.17748e-05	0.00037279
AT4G29310	Col.0	TRUE	136.871	-1.01898	0.161787	-6.29829	3.00954e-10	1.01753e-08
AT1G08890	Col.0	TRUE	360.335	1.0188	0.188246	5.41206	6.2305e-08	1.39356e-06
AT4G37400	Col.0	TRUE	113.323	-1.0183	0.244083	-4.17192	3.02042e-05	0.000356594
AT4G13110	Col.0	TRUE	74.8166	1.01829	0.194237	5.24251	1.58408e-07	3.25129e-06
AT5G16600	Col.0	TRUE	33.1733	1.01636	0.238107	4.26849	1.96801e-05	0.000246475
AT5G45380	Col.0	TRUE	117.249	-1.01628	0.345648	-2.94022	0.00327977	0.0189341
AT3G10290	Col.0	TRUE	21.9193	-1.01563	0.321918	-3.15495	0.00160526	0.01058
AT2G41200	Col.0	TRUE	52.471	1.01501	0.247588	4.09958	4.13901e-05	0.000470725
AT3G12500	Col.0	TRUE	121.487	1.015	0.345165	2.94061	0.0032757	0.0189231
AT1G16510	Col.0	TRUE	21.4199	1.0145	0.306961	3.30496	0.000949895	0.00685638
AT3G49940	Col.0	TRUE	285.009	-1.01363	0.183822	-5.51418	3.50413e-08	8.31741e-07
AT2G22870	Col.0	TRUE	33.6351	-1.01352	0.239868	-4.22534	2.38584e-05	0.00029026
AT4G33610	Col.0	TRUE	361.849	1.01327	0.339626	2.98347	0.00284997	0.0169182
AT5G07725	Col.0	TRUE	292.288	-1.013	0.225863	-4.48503	7.2903e-06	0.000103488
AT3G46320	Col.0	TRUE	87.3885	-1.01296	0.235122	-4.30824	1.64559e-05	0.000209324
AT5G10100	Col.0	TRUE	49.5796	1.01284	0.226656	4.46862	7.87259e-06	0.000110406
AT5G51070	Col.0	TRUE	1590.38	1.01258	0.165463	6.11969	9.37603e-10	2.95794e-08
AT2G02950	Col.0	TRUE	36.8458	-1.01184	0.245717	-4.11789	3.82356e-05	0.000437128
AT1G21100	Col.0	TRUE	133.581	-1.01141	0.174067	-5.81049	6.22892e-09	1.69268e-07
AT5G46280	Col.0	TRUE	117.101	-1.01118	0.170432	-5.93307	2.9733e-09	8.67427e-08
AT1G30620	Col.0	TRUE	186.837	1.0105	0.212027	4.76588	1.88035e-06	3.09769e-05
AT2G35060	Col.0	TRUE	1858.05	1.01015	0.188563	5.35707	8.45809e-08	1.83532e-06
AT1G04980	Col.0	TRUE	176.079	-1.01009	0.304832	-3.31359	0.000921075	0.00668153
AT1G70170	Col.0	TRUE	120.597	1.00993	0.213909	4.7213	2.34338e-06	3.75415e-05
AT3G10720	Col.0	TRUE	468.247	-1.00972	0.297303	-3.39627	0.000683108	0.00522239
AT4G04610	Col.0	TRUE	1771.02	1.0097	0.108469	9.30865	1.29465e-20	1.33647e-18
AT4G21880	Col.0	TRUE	71.652	-1.00907	0.224983	-4.48508	7.28876e-06	0.000103488
AT3G59670	Col.0	TRUE	145.299	-1.00882	0.140426	-7.18398	6.77083e-13	3.30641e-11
AT3G49220	Col.0	TRUE	2428.6	1.00724	0.21617	4.65951	3.16965e-06	4.91535e-05
AT3G17810	Col.0	TRUE	870.523	1.00619	0.112731	8.92556	4.4344e-19	4.0293e-17
AT5G26290	Col.0	TRUE	109.012	-1.00526	0.18047	-5.57024	2.54382e-08	6.21561e-07
AT4G21270	Col.0	TRUE	76.5882	-1.00447	0.178078	-5.6406	1.69463e-08	4.27852e-07
AT3G51090	Col.0	TRUE	53.6577	1.00445	0.194316	5.16917	2.35139e-07	4.7098e-06
AT3G20250	Col.0	TRUE	424.162	1.00439	0.107428	9.34935	8.81839e-21	9.43838e-19
AT1G53270	Col.0	TRUE	52.1828	1.00385	0.208002	4.82614	1.39208e-06	2.36477e-05
AT5G09620	Col.0	TRUE	513.994	1.00336	0.174096	5.76327	8.24997e-09	2.20075e-07
AT1G54120	Col.0	TRUE	30.3718	1.00287	0.354713	2.82727	0.00469468	0.025201
AT3G01970	Col.0	TRUE	35.6204	1.00269	0.267613	3.74678	0.000179119	0.00168407
AT4G08290	Col.0	TRUE	257.784	1.00161	0.377047	2.65645	0.00789679	0.0380888
AT4G11280	Col.0	TRUE	209.552	1.00114	0.171749	5.82906	5.57401e-09	1.53867e-07
AT4G03420	Col.0	TRUE	263.362	1.00088	0.151239	6.61787	3.6441e-11	1.40033e-09

## Sheet: Cdc73-2_DEGs_saltVSctrl
geneID	genotype	.abundant	baseMean	log2FoldChange	lfcSE	stat	pvalue	padj
AT5G48430	cdc73.2	TRUE	280.662	-4.17499	0.317968	-13.1302	2.20962e-39	9.63559e-36
AT1G52690	cdc73.2	TRUE	320.498	4.00233	0.65656	6.0959	1.08821e-09	8.91158e-08
AT5G06760	cdc73.2	TRUE	852.796	3.70986	0.383216	9.68086	3.6365e-22	4.22876e-19
AT5G52300	cdc73.2	TRUE	1262.89	3.67778	0.589659	6.23713	4.45682e-10	4.02799e-08
AT3G03341	cdc73.2	TRUE	88.619	3.60991	0.704474	5.12426	2.98706e-07	1.2865e-05
AT3G15670	cdc73.2	TRUE	84.1696	3.47867	0.402475	8.64321	5.46553e-18	2.6482e-15
AT5G40800	cdc73.2	TRUE	109.36	3.45758	0.392454	8.81015	1.24982e-18	6.78861e-16
AT5G50360	cdc73.2	TRUE	158.5	3.45249	0.627119	5.50532	3.68506e-08	2.06683e-06
AT3G48510	cdc73.2	TRUE	104.179	3.38179	0.32239	10.4897	9.62938e-26	1.67965e-22
AT2G47770	cdc73.2	TRUE	314.069	3.27669	0.681959	4.80482	1.54892e-06	5.32894e-05
AT5G59220	cdc73.2	TRUE	1841.28	3.20102	0.525716	6.08888	1.13705e-09	9.22494e-08
AT4G33905	cdc73.2	TRUE	66.8201	3.18538	0.364769	8.7326	2.48891e-18	1.27689e-15
AT3G17520	cdc73.2	TRUE	126.117	3.15979	0.690024	4.57924	4.6666e-06	0.000141319
AT1G07430	cdc73.2	TRUE	319.524	3.11322	0.346483	8.98518	2.58308e-19	1.66877e-16
AT1G56600	cdc73.2	TRUE	141.1	3.09758	0.611616	5.06458	4.09292e-07	1.67983e-05
AT5G40790	cdc73.2	TRUE	47.604	3.08777	0.373746	8.26169	1.43626e-16	5.82619e-14
AT4G01985	cdc73.2	TRUE	85.4472	3.08467	0.328902	9.37867	6.68102e-21	6.85512e-18
AT2G37870	cdc73.2	TRUE	128.614	3.07577	0.336903	9.12955	6.87815e-20	5.21633e-17
AT1G07900	cdc73.2	TRUE	64.5589	3.00975	0.434984	6.91921	4.54155e-12	6.48891e-10
AT5G13170	cdc73.2	TRUE	1168.06	2.99153	0.274089	10.9144	9.8329e-28	2.15266e-24
AT3G02480	cdc73.2	TRUE	249.63	2.95841	0.640345	4.62002	3.83702e-06	0.000118669
AT1G05100	cdc73.2	TRUE	192.795	2.9003	0.357802	8.10587	5.2368e-16	2.0299e-13
AT2G47780	cdc73.2	TRUE	76.433	2.87086	0.3397	8.45115	2.88445e-17	1.25784e-14
AT1G24580	cdc73.2	TRUE	141.524	2.85016	0.83104	3.42963	0.000604412	0.00794481
AT5G66400	cdc73.2	TRUE	1127.22	2.81133	0.398419	7.05621	1.71102e-12	2.76345e-10
AT3G27250	cdc73.2	TRUE	792.631	2.76234	0.3566	7.74633	9.45857e-15	2.74976e-12
AT5G65730	cdc73.2	TRUE	210.794	-2.7393	0.381508	-7.18019	6.96167e-13	1.22659e-10
AT1G60190	cdc73.2	TRUE	748.578	2.71694	0.365435	7.4348	1.04725e-13	2.46853e-11
AT1G69260	cdc73.2	TRUE	494.397	2.70145	0.306736	8.80709	1.28432e-18	6.78861e-16
AT1G49450	cdc73.2	TRUE	340.475	2.67534	0.185166	14.4484	2.56751e-47	4.4785e-43
AT5G59310	cdc73.2	TRUE	110.282	2.66619	0.390565	6.82651	8.70061e-12	1.195e-09
AT3G63060	cdc73.2	TRUE	106.205	2.62805	0.356938	7.36276	1.80141e-13	3.92775e-11
AT2G41190	cdc73.2	TRUE	1423.38	2.61734	0.333343	7.85177	4.10195e-15	1.35001e-12
AT5G03210	cdc73.2	TRUE	199.919	2.57632	0.619258	4.16033	3.17791e-05	0.000702108
AT5G24080	cdc73.2	TRUE	232.729	2.56882	0.252037	10.1922	2.14825e-24	3.12265e-21
AT2G36270	cdc73.2	TRUE	34.8596	2.4625	0.384597	6.40281	1.52544e-10	1.53805e-08
AT4G27410	cdc73.2	TRUE	731.746	2.44812	0.327551	7.47403	7.77773e-14	1.9108e-11
AT4G21440	cdc73.2	TRUE	36.5085	2.44154	0.337649	7.23099	4.79487e-13	8.99322e-11
AT1G80110	cdc73.2	TRUE	110.834	2.43996	0.375047	6.50574	7.731e-11	8.45466e-09
AT2G38310	cdc73.2	TRUE	360.29	-2.43005	0.173406	-14.0137	1.28537e-44	7.47356e-41
AT3G14440	cdc73.2	TRUE	1197.81	2.42598	0.369085	6.57295	4.93274e-11	5.58712e-09
AT2G34610	cdc73.2	TRUE	39.9327	2.4134	0.389194	6.20102	5.61e-10	4.91735e-08
AT5G02760	cdc73.2	TRUE	65.7394	-2.35467	0.264709	-8.89532	5.82517e-19	3.50374e-16
AT1G07985	cdc73.2	TRUE	69.2832	2.34445	0.354478	6.61381	3.74543e-11	4.32659e-09
AT1G27020	cdc73.2	TRUE	47.0894	-2.32764	0.306585	-7.59214	3.14657e-14	8.316e-12
AT1G21270	cdc73.2	TRUE	54.1974	-2.31432	0.36583	-6.32623	2.51227e-10	2.39462e-08
AT2G11810	cdc73.2	TRUE	72.0102	-2.31134	0.403519	-5.72796	1.01647e-08	6.56678e-07
AT3G05640	cdc73.2	TRUE	691.968	2.3002	0.260883	8.81699	1.17575e-18	6.78861e-16
AT2G39800	cdc73.2	TRUE	7907.66	2.29926	0.292554	7.85926	3.86399e-15	1.29615e-12
AT1G30760	cdc73.2	TRUE	138.176	-2.24048	0.403198	-5.55678	2.74798e-08	1.58646e-06
AT5G01520	cdc73.2	TRUE	383.325	2.23977	0.363147	6.16766	6.9306e-10	5.95519e-08
AT5G06090	cdc73.2	TRUE	172.258	2.22821	0.309995	7.18789	6.58021e-13	1.17121e-10
AT5G02020	cdc73.2	TRUE	121.219	2.22673	0.3649	6.10231	1.04546e-09	8.68383e-08
AT1G74670	cdc73.2	TRUE	78.9585	-2.22604	0.297548	-7.48127	7.3606e-14	1.83416e-11
AT3G55090	cdc73.2	TRUE	174.998	2.21455	0.24594	9.00441	2.16831e-19	1.45468e-16
AT5G59320	cdc73.2	TRUE	334.185	2.21068	0.266273	8.3023	1.02119e-16	4.2411e-14
AT2G18480	cdc73.2	TRUE	47.5314	2.20876	0.415551	5.31527	1.06499e-07	5.20354e-06
AT4G37610	cdc73.2	TRUE	75.8557	-2.20724	0.301824	-7.313	2.61251e-13	5.425e-11
AT4G03540	cdc73.2	TRUE	48.2174	2.19813	0.340142	6.4624	1.03056e-10	1.0829e-08
AT2G19810	cdc73.2	TRUE	274.256	2.19557	0.394234	5.56919	2.55924e-08	1.49801e-06
AT5G17460	cdc73.2	TRUE	401.334	2.19224	0.303353	7.22669	4.94925e-13	9.18402e-11
AT5G15190	cdc73.2	TRUE	36.3681	2.18123	0.430363	5.06834	4.01309e-07	1.65878e-05
AT1G16390	cdc73.2	TRUE	78.9205	-2.18008	0.270103	-8.0713	6.95513e-16	2.63735e-13
AT3G08860	cdc73.2	TRUE	140.034	2.16153	0.232566	9.29427	1.48226e-20	1.43639e-17
AT3G61890	cdc73.2	TRUE	202.206	2.15002	0.250382	8.58693	8.93245e-18	4.10023e-15
AT5G11110	cdc73.2	TRUE	1041.95	2.14767	0.151115	14.2121	7.70457e-46	6.71954e-42
AT1G60470	cdc73.2	TRUE	43.9667	2.14501	0.330425	6.49166	8.48979e-11	9.08512e-09
AT3G55500	cdc73.2	TRUE	690.759	2.13843	0.320634	6.66938	2.56891e-11	3.1556e-09
AT2G46680	cdc73.2	TRUE	429.234	2.13463	0.29896	7.1402	9.31979e-13	1.56313e-10
AT3G51750	cdc73.2	TRUE	37.796	2.13274	0.279554	7.6291	2.36396e-14	6.41563e-12
AT4G02280	cdc73.2	TRUE	359.081	2.12932	0.290429	7.33163	2.27374e-13	4.8964e-11
AT2G32660	cdc73.2	TRUE	32.2379	-2.12723	0.463623	-4.58827	4.46935e-06	0.00013653
AT1G05340	cdc73.2	TRUE	96.6788	2.12605	0.32979	6.44668	1.14328e-10	1.18703e-08
AT1G03870	cdc73.2	TRUE	371.018	-2.12323	0.294609	-7.20694	5.72219e-13	1.02899e-10
AT1G67110	cdc73.2	TRUE	73.7487	-2.10681	0.301495	-6.98789	2.79059e-12	4.16036e-10
AT5G28770	cdc73.2	TRUE	26.6848	-2.10031	0.364089	-5.76867	7.98984e-09	5.2869e-07
AT4G36670	cdc73.2	TRUE	140.687	-2.09677	0.277961	-7.54337	4.57975e-14	1.15775e-11
AT5G15130	cdc73.2	TRUE	68.6647	-2.09131	0.240938	-8.67987	3.9621e-18	1.9746e-15
AT3G57540	cdc73.2	TRUE	158.748	2.08212	0.20822	9.99958	1.5305e-23	2.05357e-20
AT5G64120	cdc73.2	TRUE	427.454	-2.07698	0.349061	-5.95021	2.67802e-09	2.01348e-07
AT5G45810	cdc73.2	TRUE	49.2125	2.0654	0.262548	7.86678	3.63899e-15	1.24461e-12
AT3G45650	cdc73.2	TRUE	121.347	-2.06137	0.284715	-7.24012	4.48302e-13	8.49971e-11
AT5G61440	cdc73.2	TRUE	46.4037	-2.05979	0.278255	-7.40252	1.3362e-13	3.02692e-11
AT2G33380	cdc73.2	TRUE	681.181	2.05686	0.278349	7.38947	1.47415e-13	3.25488e-11
AT1G69480	cdc73.2	TRUE	205.634	2.05258	0.307966	6.66497	2.64728e-11	3.22912e-09
AT2G30010	cdc73.2	TRUE	110.861	-2.04816	0.29088	-7.04125	1.90522e-12	3.04888e-10
AT3G20110	cdc73.2	TRUE	29.1339	-2.04708	0.425243	-4.81392	1.48e-06	5.112e-05
AT4G10960	cdc73.2	TRUE	118.714	2.04624	0.208577	9.81047	1.01493e-22	1.26453e-19
AT2G40610	cdc73.2	TRUE	161.483	-2.04389	0.31419	-6.50527	7.75523e-11	8.45466e-09
AT3G11410	cdc73.2	TRUE	1812.3	2.04018	0.279195	7.30734	2.7248e-13	5.59162e-11
AT1G12740	cdc73.2	TRUE	204.639	-2.0354	0.34764	-5.8549	4.77295e-09	3.33073e-07
AT3G13672	cdc73.2	TRUE	29.4207	2.0351	0.388183	5.24263	1.58306e-07	7.26668e-06
AT1G51850	cdc73.2	TRUE	94.7885	-2.03415	0.306761	-6.63105	3.33302e-11	3.95496e-09
AT3G29575	cdc73.2	TRUE	532.314	2.01614	0.275455	7.31929	2.49281e-13	5.2388e-11
AT3G09910	cdc73.2	TRUE	23.0342	2.00293	0.409666	4.88918	1.01257e-06	3.70763e-05
AT4G34380	cdc73.2	TRUE	37.9355	2.00061	0.375829	5.32319	1.0196e-07	5.05255e-06
AT5G57050	cdc73.2	TRUE	535.292	1.98291	0.255357	7.76524	8.14913e-15	2.45078e-12
AT2G19900	cdc73.2	TRUE	86.3401	1.98102	0.254506	7.78378	7.03902e-15	2.19253e-12
AT3G22800	cdc73.2	TRUE	57.929	-1.98049	0.248073	-7.98349	1.42248e-15	5.27923e-13
AT1G54120	cdc73.2	TRUE	22.12	1.97908	0.424954	4.65716	3.20596e-06	0.00010076
AT1G04247	cdc73.2	TRUE	66.1959	1.97768	0.318516	6.20905	5.33042e-10	4.71973e-08
AT5G37300	cdc73.2	TRUE	48.405	1.96935	0.304386	6.46989	9.80769e-11	1.04314e-08
AT1G69490	cdc73.2	TRUE	30.5941	1.96432	0.457021	4.29809	1.72275e-05	0.000422643
AT5G43350	cdc73.2	TRUE	680.529	-1.96077	0.273952	-7.15732	8.22685e-13	1.40687e-10
AT1G05650	cdc73.2	TRUE	42.1705	1.95994	0.436945	4.48556	7.27244e-06	0.000207616
AT2G45570	cdc73.2	TRUE	47.841	1.95746	0.37289	5.24943	1.52571e-07	7.0219e-06
AT5G44130	cdc73.2	TRUE	388.493	-1.95701	0.306122	-6.3929	1.62768e-10	1.6317e-08
AT1G52190	cdc73.2	TRUE	183.869	-1.95533	0.333068	-5.87066	4.34067e-09	3.09038e-07
AT4G24410	cdc73.2	TRUE	45.1506	1.94982	0.368664	5.28889	1.23063e-07	5.89724e-06
AT4G26080	cdc73.2	TRUE	2049.6	1.94153	0.293281	6.62002	3.59158e-11	4.20456e-09
AT1G53470	cdc73.2	TRUE	609.59	1.94009	0.246571	7.86828	3.59549e-15	1.24461e-12
AT1G62570	cdc73.2	TRUE	2095.05	1.93593	0.248679	7.78485	6.97938e-15	2.19253e-12
AT1G73390	cdc73.2	TRUE	815.195	1.92529	0.210429	9.14937	5.72653e-20	4.54036e-17
AT2G19800	cdc73.2	TRUE	78.3673	-1.91687	0.23076	-8.30676	9.83531e-17	4.18433e-14
AT1G17940	cdc73.2	TRUE	286.163	1.91296	0.217182	8.80809	1.27298e-18	6.78861e-16
AT2G26440	cdc73.2	TRUE	94.9352	-1.91255	0.372184	-5.13872	2.76617e-07	1.20928e-05
AT5G05390	cdc73.2	TRUE	104.433	1.90963	0.32759	5.82933	5.56499e-09	3.80667e-07
AT5G47980	cdc73.2	TRUE	52.7194	-1.89789	0.291995	-6.49975	8.04529e-11	8.7164e-09
AT1G23200	cdc73.2	TRUE	164.088	1.8937	0.289191	6.54826	5.821e-11	6.42631e-09
AT1G77120	cdc73.2	TRUE	194.487	1.89256	0.38742	4.88503	1.03415e-06	3.75805e-05
AT2G46880	cdc73.2	TRUE	70.2497	-1.8888	0.371434	-5.08517	3.67306e-07	1.54012e-05
AT1G66830	cdc73.2	TRUE	19.9491	1.88509	0.412307	4.57207	4.82931e-06	0.000144987
AT1G23480	cdc73.2	TRUE	86.5046	-1.88196	0.302265	-6.22619	4.77929e-10	4.29718e-08
AT3G23920	cdc73.2	TRUE	2022.7	1.87361	0.255825	7.32378	2.41079e-13	5.12822e-11
AT1G73830	cdc73.2	TRUE	45.7576	-1.86825	0.315529	-5.92102	3.19957e-09	2.34648e-07
AT3G03470	cdc73.2	TRUE	306.392	1.86805	0.319916	5.8392	5.24519e-09	3.61628e-07
AT1G30840	cdc73.2	TRUE	45.1257	-1.86606	0.309939	-6.02075	1.73614e-09	1.36549e-07
AT4G01060	cdc73.2	TRUE	23.531	1.86354	0.402499	4.62994	3.65778e-06	0.000113912
AT4G14690	cdc73.2	TRUE	198.59	1.86282	0.288882	6.44836	1.13068e-10	1.18098e-08
AT5G65970	cdc73.2	TRUE	65.0411	-1.85866	0.30652	-6.06373	1.33e-09	1.07403e-07
AT1G20450	cdc73.2	TRUE	2462.14	1.85719	0.170165	10.9141	9.87291e-28	2.15266e-24
AT1G51820	cdc73.2	TRUE	75.3664	-1.85278	0.384778	-4.81519	1.47062e-06	5.08967e-05
AT2G33590	cdc73.2	TRUE	357.614	1.84304	0.231592	7.95815	1.74626e-15	6.34585e-13
AT1G45249	cdc73.2	TRUE	762.135	1.83989	0.262475	7.00974	2.38755e-12	3.68549e-10
AT1G21120	cdc73.2	TRUE	19.9083	-1.83893	0.3772	-4.87522	1.08689e-06	3.93332e-05
AT2G25625	cdc73.2	TRUE	169.931	1.83846	0.256484	7.16791	7.61496e-13	1.32828e-10
AT1G16850	cdc73.2	TRUE	403.144	1.8366	0.305054	6.02058	1.73789e-09	1.36549e-07
AT4G21410	cdc73.2	TRUE	226.041	-1.82384	0.169304	-10.7726	4.63632e-27	8.9857e-24
AT4G00950	cdc73.2	TRUE	27.9504	-1.82255	0.316881	-5.75154	8.84343e-09	5.79909e-07
AT1G71910	cdc73.2	TRUE	23.2393	1.82238	0.356914	5.10592	3.29188e-07	1.40392e-05
AT1G29640	cdc73.2	TRUE	132.352	1.81418	0.284106	6.38558	1.70745e-10	1.69222e-08
AT4G34000	cdc73.2	TRUE	1329.36	1.81351	0.259235	6.9956	2.64132e-12	4.00632e-10
AT1G21400	cdc73.2	TRUE	297.819	1.81163	0.330355	5.48388	4.161e-08	2.29684e-06
AT2G42530	cdc73.2	TRUE	167.907	1.80688	0.408234	4.42609	9.59552e-06	0.000261932
AT4G18205	cdc73.2	TRUE	27.2209	-1.80544	0.383574	-4.7069	2.51506e-06	8.16951e-05
AT3G19580	cdc73.2	TRUE	102.791	1.80171	0.290279	6.20681	5.40723e-10	4.76355e-08
AT2G44460	cdc73.2	TRUE	39.4437	1.80087	0.402576	4.47336	7.70009e-06	0.000216633
AT5G20250	cdc73.2	TRUE	536.333	-1.79846	0.234817	-7.65899	1.87402e-14	5.18865e-12
AT1G77380	cdc73.2	TRUE	108.461	-1.79582	0.329304	-5.45337	4.94252e-08	2.66087e-06
AT4G30470	cdc73.2	TRUE	605.701	1.7929	0.200536	8.94054	3.87273e-19	2.41257e-16
AT4G21930	cdc73.2	TRUE	30.7687	1.79141	0.347224	5.15923	2.47967e-07	1.09501e-05
AT1G54100	cdc73.2	TRUE	1707.64	1.78999	0.271726	6.58748	4.47351e-11	5.10009e-09
AT5G15960	cdc73.2	TRUE	663.84	1.78446	0.25513	6.99434	2.66519e-12	4.00766e-10
AT4G30280	cdc73.2	TRUE	140.573	-1.78383	0.312319	-5.71156	1.11943e-08	7.12637e-07
AT5G48850	cdc73.2	TRUE	46.4769	1.78335	0.251089	7.10247	1.22545e-12	2.03576e-10
AT3G14360	cdc73.2	TRUE	41.7097	1.78301	0.288286	6.18487	6.21553e-10	5.3672e-08
AT3G28007	cdc73.2	TRUE	139.533	1.77999	0.307986	5.77945	7.49433e-09	5.02783e-07
AT4G02360	cdc73.2	TRUE	98.2254	1.77607	0.216615	8.1992	2.41985e-16	9.59304e-14
AT4G12520	cdc73.2	TRUE	20.9224	-1.77267	0.424166	-4.17918	2.92558e-05	0.000656768
AT3G50400	cdc73.2	TRUE	103.867	1.77139	0.336914	5.2577	1.45868e-07	6.78192e-06
AT1G47960	cdc73.2	TRUE	63.661	1.76834	0.266136	6.6445	3.04252e-11	3.63498e-09
AT1G18100	cdc73.2	TRUE	43.0472	1.76709	0.315278	5.60485	2.08434e-08	1.24511e-06
AT5G24230	cdc73.2	TRUE	24.8069	-1.76412	0.341985	-5.15848	2.48962e-07	1.09663e-05
AT2G18300	cdc73.2	TRUE	96.467	-1.75847	0.286375	-6.14045	8.22893e-10	7.03614e-08
AT5G22460	cdc73.2	TRUE	27.7597	1.75645	0.386498	4.54453	5.50575e-06	0.000162774
AT2G32510	cdc73.2	TRUE	181.085	1.75146	0.159913	10.9525	6.46129e-28	1.87841e-24
AT5G20830	cdc73.2	TRUE	422.285	1.74328	0.240047	7.26226	3.80664e-13	7.46059e-11
AT5G05440	cdc73.2	TRUE	119.179	-1.74043	0.189853	-9.16724	4.85282e-20	4.03085e-17
AT1G64110	cdc73.2	TRUE	85.1753	1.7376	0.287661	6.04044	1.53697e-09	1.21861e-07
AT1G46554	cdc73.2	TRUE	30.3622	1.73479	0.351129	4.94061	7.78788e-07	2.934e-05
AT5G53120	cdc73.2	TRUE	572.126	1.73427	0.257559	6.73351	1.65623e-11	2.17215e-09
AT5G63180	cdc73.2	TRUE	99.3483	-1.73205	0.345848	-5.00812	5.49647e-07	2.16912e-05
AT2G34850	cdc73.2	TRUE	39.4046	1.72748	0.308874	5.59283	2.23392e-08	1.3299e-06
AT1G28660	cdc73.2	TRUE	67.5399	-1.72361	0.273211	-6.30873	2.81337e-10	2.64119e-08
AT1G35140	cdc73.2	TRUE	64.0905	-1.71957	0.351469	-4.89251	9.95565e-07	3.66364e-05
AT2G46270	cdc73.2	TRUE	271.552	1.71629	0.251739	6.81774	9.24835e-12	1.2603e-09
AT2G39350	cdc73.2	TRUE	417.35	1.71576	0.167925	10.2174	1.65745e-24	2.62826e-21
AT2G39050	cdc73.2	TRUE	343.39	1.71479	0.257008	6.67212	2.5214e-11	3.11921e-09
AT1G22330	cdc73.2	TRUE	73.5767	-1.71016	0.2736	-6.25058	4.0894e-10	3.73463e-08
AT1G72430	cdc73.2	TRUE	112.935	-1.70936	0.18622	-9.17923	4.34186e-20	3.78675e-17
AT1G51790	cdc73.2	TRUE	113.505	-1.70926	0.274597	-6.22461	4.82756e-10	4.31831e-08
AT4G21870	cdc73.2	TRUE	38.8342	-1.70632	0.317092	-5.38116	7.4008e-08	3.7857e-06
AT5G47640	cdc73.2	TRUE	213.627	1.70435	0.290476	5.86745	4.42554e-09	3.12529e-07
AT5G06570	cdc73.2	TRUE	31.7704	-1.69497	0.33061	-5.1268	2.94706e-07	1.27242e-05
AT4G33070	cdc73.2	TRUE	135.588	1.69419	0.175581	9.64901	4.96314e-22	5.41075e-19
AT4G40010	cdc73.2	TRUE	134.791	1.69374	0.218581	7.74878	9.27778e-15	2.74292e-12
AT4G05100	cdc73.2	TRUE	76.7812	1.69183	0.232941	7.26292	3.78818e-13	7.46059e-11
AT3G62150	cdc73.2	TRUE	94.1757	-1.69007	0.253123	-6.67686	2.44111e-11	3.04145e-09
AT4G29190	cdc73.2	TRUE	302.776	1.68599	0.377818	4.46243	8.1036e-06	0.000226888
AT5G04370	cdc73.2	TRUE	66.0948	1.68322	0.316314	5.32135	1.03e-07	5.0752e-06
AT2G39030	cdc73.2	TRUE	93.1452	1.6805	0.391348	4.29413	1.75381e-05	0.000428455
AT5G03120	cdc73.2	TRUE	30.8051	-1.67861	0.330975	-5.07172	3.94244e-07	1.63733e-05
AT2G30600	cdc73.2	TRUE	542.776	-1.67834	0.153174	-10.9571	6.14551e-28	1.87841e-24
AT2G28400	cdc73.2	TRUE	130.884	1.67276	0.331168	5.05109	4.39289e-07	1.78198e-05
AT3G62590	cdc73.2	TRUE	141.496	1.66856	0.19349	8.62353	6.49239e-18	3.06072e-15
AT5G23020	cdc73.2	TRUE	86.7751	-1.66801	0.307688	-5.4211	5.92342e-08	3.12152e-06
AT1G69252	cdc73.2	TRUE	268.961	1.66644	0.29963	5.56165	2.67239e-08	1.55382e-06
AT5G28510	cdc73.2	TRUE	143.565	1.66529	0.328189	5.07417	3.89183e-07	1.62017e-05
AT4G12430	cdc73.2	TRUE	51.1039	1.65828	0.256599	6.46254	1.02962e-10	1.0829e-08
AT1G71400	cdc73.2	TRUE	60.9635	-1.65703	0.273514	-6.05832	1.37548e-09	1.10565e-07
AT4G03210	cdc73.2	TRUE	354.466	-1.65474	0.371242	-4.45732	8.29917e-06	0.00023162
AT5G47530	cdc73.2	TRUE	101.975	1.65107	0.371281	4.44694	8.71016e-06	0.000242315
AT1G02205	cdc73.2	TRUE	2690.46	1.65053	0.288471	5.72166	1.05491e-08	6.78996e-07
AT5G52310	cdc73.2	TRUE	7017.22	1.65039	0.260763	6.3291	2.46593e-10	2.36336e-08
AT2G44380	cdc73.2	TRUE	64.3258	-1.64538	0.244986	-6.71621	1.86518e-11	2.42794e-09
AT1G04220	cdc73.2	TRUE	294.72	1.64362	0.288697	5.69324	1.24654e-08	7.87344e-07
AT4G25850	cdc73.2	TRUE	22.563	1.64346	0.381397	4.30906	1.63953e-05	0.000408548
AT5G49740	cdc73.2	TRUE	156.346	-1.64328	0.252993	-6.49536	8.28325e-11	8.91881e-09
AT4G33550	cdc73.2	TRUE	184.208	1.6426	0.215348	7.62765	2.39074e-14	6.41563e-12
AT1G63720	cdc73.2	TRUE	77.9149	1.64135	0.2337	7.02334	2.16629e-12	3.3738e-10
AT1G68500	cdc73.2	TRUE	53.9686	1.63965	0.303727	5.39843	6.72254e-08	3.47956e-06
AT2G41100	cdc73.2	TRUE	47.8802	-1.63943	0.392313	-4.17887	2.92957e-05	0.000656819
AT3G50970	cdc73.2	TRUE	607.411	1.63599	0.247071	6.62153	3.5551e-11	4.18998e-09
AT5G10580	cdc73.2	TRUE	61.5099	-1.63285	0.365181	-4.47135	7.77284e-06	0.000217977
AT4G15120	cdc73.2	TRUE	28.5717	1.62639	0.332765	4.88751	1.02117e-06	3.72549e-05
AT4G02380	cdc73.2	TRUE	303.31	1.62635	0.28756	5.65569	1.55221e-08	9.46686e-07
AT2G37770	cdc73.2	TRUE	191.656	1.62483	0.305324	5.32166	1.02822e-07	5.0752e-06
AT5G13580	cdc73.2	TRUE	473.491	1.62361	0.265223	6.12166	9.26078e-10	7.80366e-08
AT5G18130	cdc73.2	TRUE	145.983	1.62211	0.358049	4.53042	5.88654e-06	0.000173152
AT1G66940	cdc73.2	TRUE	93.5286	-1.62201	0.236108	-6.86979	6.42963e-12	8.97217e-10
AT1G03790	cdc73.2	TRUE	53.1071	1.6142	0.342106	4.71843	2.37669e-06	7.74889e-05
AT3G16990	cdc73.2	TRUE	69.7133	1.61057	0.319701	5.03773	4.7108e-07	1.8977e-05
AT3G22600	cdc73.2	TRUE	926.128	1.60943	0.258858	6.21742	5.05388e-10	4.49769e-08
AT3G01290	cdc73.2	TRUE	129.95	-1.60767	0.173715	-9.25463	2.14974e-20	1.97358e-17
AT1G18140	cdc73.2	TRUE	56.3162	-1.60213	0.334354	-4.79171	1.65367e-06	5.59009e-05
AT3G55840	cdc73.2	TRUE	35.2503	1.59902	0.339468	4.71038	2.47258e-06	8.04648e-05
AT1G72770	cdc73.2	TRUE	1221.35	1.59789	0.299892	5.32822	9.91816e-08	4.92885e-06
AT3G15990	cdc73.2	TRUE	264.893	1.59637	0.24314	6.56562	5.18154e-11	5.83107e-09
AT1G55740	cdc73.2	TRUE	184.501	1.59575	0.214447	7.44125	9.97375e-14	2.41628e-11
AT5G64100	cdc73.2	TRUE	1086.85	-1.59484	0.314485	-5.07126	3.95195e-07	1.63739e-05
AT1G73480	cdc73.2	TRUE	1408.7	1.59431	0.234041	6.81211	9.61789e-12	1.2905e-09
AT1G62540	cdc73.2	TRUE	193.439	1.59264	0.21957	7.25344	4.06307e-13	7.78815e-11
AT3G50740	cdc73.2	TRUE	194.47	-1.59251	0.186529	-8.53762	1.37019e-17	6.12828e-15
AT4G17460	cdc73.2	TRUE	66.4342	-1.58961	0.288042	-5.51868	3.41552e-08	1.92806e-06
AT5G47560	cdc73.2	TRUE	3244.2	1.58944	0.266621	5.96143	2.5004e-09	1.88807e-07
AT4G21400	cdc73.2	TRUE	46.2785	-1.58681	0.234828	-6.75731	1.40577e-11	1.85765e-09
AT1G51840	cdc73.2	TRUE	99.8826	-1.58377	0.228633	-6.92712	4.29481e-12	6.19127e-10
AT1G09950	cdc73.2	TRUE	24.5769	1.58287	0.374296	4.22893	2.34801e-05	0.000549012
AT3G30775	cdc73.2	TRUE	353.802	-1.58128	0.175435	-9.01348	1.99625e-19	1.45086e-16
AT1G48100	cdc73.2	TRUE	363.554	1.5811	0.25518	6.19602	5.79076e-10	5.05041e-08
AT5G05840	cdc73.2	TRUE	49.7788	1.57907	0.247183	6.38828	1.67763e-10	1.67217e-08
AT1G13300	cdc73.2	TRUE	51.0168	-1.57654	0.258248	-6.10475	1.02962e-09	8.59311e-08
AT1G05300	cdc73.2	TRUE	58.9761	-1.57332	0.245041	-6.42063	1.35711e-10	1.39778e-08
AT3G48020	cdc73.2	TRUE	20.672	1.57206	0.374514	4.1976	2.69764e-05	0.000617519
AT5G49730	cdc73.2	TRUE	214.925	-1.5716	0.221816	-7.08517	1.38871e-12	2.26386e-10
AT4G03820	cdc73.2	TRUE	150.036	1.56727	0.25737	6.08957	1.13217e-09	9.22494e-08
AT3G56260	cdc73.2	TRUE	63.484	1.56526	0.281709	5.55628	2.75581e-08	1.58646e-06
AT1G52200	cdc73.2	TRUE	78.3731	-1.56345	0.24783	-6.30856	2.81638e-10	2.64119e-08
AT5G10930	cdc73.2	TRUE	203.253	1.56344	0.228813	6.83281	8.32697e-12	1.15276e-09
AT5G13900	cdc73.2	TRUE	41.4033	1.56069	0.265967	5.86798	4.41139e-09	3.12529e-07
AT5G38340	cdc73.2	TRUE	24.7075	-1.55833	0.37192	-4.18997	2.78993e-05	0.000629946
AT5G26290	cdc73.2	TRUE	79.1871	-1.55667	0.221178	-7.03808	1.94906e-12	3.09068e-10
AT3G11420	cdc73.2	TRUE	543.521	1.55179	0.20186	7.68748	1.5006e-14	4.29097e-12
AT1G65845	cdc73.2	TRUE	49.2292	-1.55036	0.298955	-5.18592	2.14953e-07	9.63862e-06
AT1G69430	cdc73.2	TRUE	18.9846	1.54957	0.362963	4.26922	1.9616e-05	0.000471425
AT4G23450	cdc73.2	TRUE	35.7885	1.54627	0.284394	5.43706	5.41658e-08	2.88934e-06
AT1G18870	cdc73.2	TRUE	478.816	1.53772	0.214756	7.16032	8.04919e-13	1.39012e-10
AT1G51140	cdc73.2	TRUE	377.746	1.53604	0.197439	7.77983	7.26242e-15	2.22243e-12
AT5G62280	cdc73.2	TRUE	55.647	-1.53309	0.298646	-5.13347	2.84445e-07	1.23696e-05
AT1G31820	cdc73.2	TRUE	81.4497	1.53186	0.255754	5.98958	2.10383e-09	1.61661e-07
AT5G65990	cdc73.2	TRUE	1212.05	1.53154	0.202249	7.57253	3.66022e-14	9.46165e-12
AT1G19970	cdc73.2	TRUE	139.992	1.53025	0.206173	7.42219	1.15204e-13	2.67933e-11
AT1G77450	cdc73.2	TRUE	353.698	1.5298	0.373838	4.09216	4.27376e-05	0.00091245
AT5G22270	cdc73.2	TRUE	21.0792	1.52979	0.395476	3.86823	0.00010963	0.00198163
AT1G52827	cdc73.2	TRUE	50.4529	1.52812	0.233032	6.55756	5.4694e-11	6.07661e-09
AT1G51830	cdc73.2	TRUE	216.758	-1.52764	0.304783	-5.01221	5.38088e-07	2.13315e-05
AT3G25620	cdc73.2	TRUE	82.0692	1.52646	0.275762	5.53543	3.10459e-08	1.77552e-06
AT4G23820	cdc73.2	TRUE	312.07	-1.5262	0.332422	-4.59117	4.40771e-06	0.000134884
AT1G14540	cdc73.2	TRUE	48.2007	-1.52475	0.261088	-5.83999	5.2203e-09	3.6134e-07
AT1G78120	cdc73.2	TRUE	51.182	-1.52368	0.302602	-5.03526	4.77191e-07	1.91789e-05
AT5G50240	cdc73.2	TRUE	24.3624	1.52314	0.386509	3.94076	8.12244e-05	0.00155011
AT1G46768	cdc73.2	TRUE	33.5686	1.52166	0.381854	3.98493	6.75004e-05	0.00132293
AT2G45180	cdc73.2	TRUE	2498.03	-1.52084	0.226765	-6.70667	1.99118e-11	2.57275e-09
AT3G54390	cdc73.2	TRUE	62.1475	1.51884	0.269114	5.64385	1.66286e-08	1.00018e-06
AT3G23550	cdc73.2	TRUE	19.0128	-1.51833	0.389418	-3.89897	9.66012e-05	0.00178687
AT4G33150	cdc73.2	TRUE	508.977	1.51768	0.238385	6.36649	1.93399e-10	1.90591e-08
AT4G11350	cdc73.2	TRUE	90.7819	1.51638	0.231112	6.56122	5.33688e-11	5.96738e-09
AT3G54880	cdc73.2	TRUE	31.0459	-1.514	0.277346	-5.45888	4.79137e-08	2.60361e-06
AT5G15180	cdc73.2	TRUE	54.3539	1.51199	0.311739	4.85018	1.23352e-06	4.40005e-05
AT1G64940	cdc73.2	TRUE	88.2936	1.51128	0.369582	4.08917	4.32927e-05	0.000921924
AT4G11210	cdc73.2	TRUE	46.691	-1.51083	0.374171	-4.0378	5.39545e-05	0.00110461
AT4G17030	cdc73.2	TRUE	86.1854	1.51009	0.303707	4.9722	6.61981e-07	2.54338e-05
AT1G13110	cdc73.2	TRUE	221.204	-1.5058	0.320802	-4.69386	2.68092e-06	8.65987e-05
AT4G29740	cdc73.2	TRUE	56.5531	-1.50553	0.275446	-5.46578	4.60869e-08	2.52004e-06
AT3G16690	cdc73.2	TRUE	56.9223	-1.50319	0.26919	-5.58412	2.34889e-08	1.39359e-06
AT1G73810	cdc73.2	TRUE	54.1811	1.50024	0.326204	4.59909	4.24341e-06	0.000130313
AT3G23730	cdc73.2	TRUE	217.329	-1.49969	0.373337	-4.017	5.89436e-05	0.00118999
AT4G24415	cdc73.2	TRUE	37.7805	1.49897	0.352806	4.2487	2.15016e-05	0.000509583
AT2G39110	cdc73.2	TRUE	94.9992	1.49812	0.191444	7.82536	5.06201e-15	1.63512e-12
AT1G64170	cdc73.2	TRUE	88.8245	-1.4978	0.283412	-5.28488	1.25786e-07	5.99943e-06
AT3G57010	cdc73.2	TRUE	1529.04	1.49631	0.338635	4.41866	9.93134e-06	0.000268577
AT5G44020	cdc73.2	TRUE	888.456	-1.49586	0.288384	-5.18703	2.13672e-07	9.60589e-06
AT5G54230	cdc73.2	TRUE	28.0242	1.49463	0.34275	4.36071	1.29644e-05	0.000332067
AT1G26770	cdc73.2	TRUE	857.238	1.49388	0.239064	6.24889	4.13393e-10	3.75563e-08
AT4G05200	cdc73.2	TRUE	34.7545	-1.49024	0.337321	-4.41788	9.96735e-06	0.000268953
AT2G41090	cdc73.2	TRUE	72.6942	-1.48517	0.371869	-3.99381	6.50192e-05	0.00128586
AT1G23110	cdc73.2	TRUE	34.6215	-1.48236	0.350567	-4.22845	2.35302e-05	0.000549448
AT5G10300	cdc73.2	TRUE	61.2663	1.47913	0.289489	5.10943	3.23128e-07	1.38145e-05
AT3G22620	cdc73.2	TRUE	759.63	1.47764	0.315721	4.68022	2.86569e-06	9.1563e-05
AT4G19380	cdc73.2	TRUE	90.2176	-1.47544	0.350102	-4.21433	2.5052e-05	0.000581092
AT1G07560	cdc73.2	TRUE	42.0029	-1.4728	0.297212	-4.95538	7.21896e-07	2.72841e-05
AT5G57190	cdc73.2	TRUE	37.41	-1.47235	0.250501	-5.87762	4.16201e-09	2.98757e-07
AT5G48180	cdc73.2	TRUE	2402.08	1.47151	0.212703	6.91815	4.57568e-12	6.48891e-10
AT1G02810	cdc73.2	TRUE	67.4863	-1.46891	0.255609	-5.7467	9.10044e-09	5.94528e-07
AT2G10940	cdc73.2	TRUE	6404.03	-1.46636	0.295875	-4.95601	7.19542e-07	2.72841e-05
AT1G68840	cdc73.2	TRUE	214.147	-1.46542	0.275855	-5.31228	1.08264e-07	5.25539e-06
AT2G41660	cdc73.2	TRUE	412.135	1.46116	0.162214	9.00759	2.10628e-19	1.45468e-16
AT3G15500	cdc73.2	TRUE	38.4745	1.46076	0.349944	4.17427	2.98941e-05	0.00066766
AT2G28780	cdc73.2	TRUE	24.1402	-1.4579	0.458427	-3.18023	0.00147156	0.0163806
AT2G46950	cdc73.2	TRUE	23.9062	1.45685	0.346052	4.2099	2.55482e-05	0.000590332
AT1G02820	cdc73.2	TRUE	64.5239	1.45121	0.363034	3.99744	6.40303e-05	0.00127352
AT3G48240	cdc73.2	TRUE	24.8752	1.44999	0.337242	4.29955	1.71145e-05	0.00042165
AT4G15150	cdc73.2	TRUE	20.7929	1.44873	0.475058	3.04959	0.00229156	0.0234163
AT1G50260	cdc73.2	TRUE	334.637	1.44758	0.229764	6.30031	2.97058e-10	2.7709e-08
AT3G46280	cdc73.2	TRUE	388.401	-1.44582	0.239335	-6.04099	1.53174e-09	1.21861e-07
AT4G24960	cdc73.2	TRUE	774.432	1.4419	0.198421	7.26691	3.67803e-13	7.37424e-11
AT1G57590	cdc73.2	TRUE	120.908	1.44176	0.194838	7.39975	1.36439e-13	3.05116e-11
AT1G65310	cdc73.2	TRUE	89.5379	-1.44174	0.337949	-4.26614	1.98884e-05	0.000475875
AT4G25090	cdc73.2	TRUE	48.7959	-1.44131	0.385234	-3.74139	0.000183002	0.00300292
AT3G17000	cdc73.2	TRUE	332.361	1.44111	0.274364	5.25256	1.5e-07	6.92183e-06
AT4G04570	cdc73.2	TRUE	193.914	-1.4401	0.335901	-4.28729	1.8087e-05	0.000439403
AT2G21590	cdc73.2	TRUE	88.7789	1.43837	0.239649	6.00199	1.94917e-09	1.51109e-07
AT2G27690	cdc73.2	TRUE	50.1732	-1.4361	0.379338	-3.78579	0.000153218	0.0026074
AT4G23510	cdc73.2	TRUE	16.4606	-1.43495	0.415872	-3.45045	0.000559663	0.00748635
AT2G02680	cdc73.2	TRUE	59.0274	-1.43477	0.239615	-5.9878	2.12703e-09	1.62727e-07
AT2G21130	cdc73.2	TRUE	44.1158	1.43436	0.370123	3.87537	0.000106461	0.00193841
AT2G47485	cdc73.2	TRUE	156.398	1.43201	0.245518	5.83259	5.45742e-09	3.74779e-07
AT1G21910	cdc73.2	TRUE	42.9978	-1.43085	0.296898	-4.81932	1.44051e-06	5.02535e-05
AT1G52565	cdc73.2	TRUE	21.7222	1.43006	0.438005	3.26494	0.00109485	0.0127317
AT2G02950	cdc73.2	TRUE	32.2461	-1.42998	0.297564	-4.80563	1.54267e-06	5.31795e-05
AT4G28040	cdc73.2	TRUE	267.488	1.42783	0.192683	7.41022	1.26086e-13	2.89385e-11
AT4G22820	cdc73.2	TRUE	153.198	1.42773	0.269635	5.29504	1.18992e-07	5.73366e-06
AT1G66540	cdc73.2	TRUE	40.1698	1.4269	0.290714	4.90826	9.18875e-07	3.4102e-05
AT5G62340	cdc73.2	TRUE	48.4537	-1.42508	0.321313	-4.43516	9.20038e-06	0.00025433
AT1G01520	cdc73.2	TRUE	20.763	1.41998	0.370358	3.83406	0.000126044	0.00222186
AT4G21850	cdc73.2	TRUE	136.401	-1.41809	0.21169	-6.69889	2.10015e-11	2.6936e-09
AT3G62550	cdc73.2	TRUE	168.425	1.41351	0.287633	4.91428	8.91097e-07	3.31416e-05
AT1G01470	cdc73.2	TRUE	920.721	1.41083	0.221838	6.35974	2.02091e-10	1.98038e-08
AT4G15248	cdc73.2	TRUE	31.731	1.40997	0.344283	4.09538	4.21484e-05	0.000900973
AT3G02410	cdc73.2	TRUE	30.9889	1.40947	0.33214	4.24361	2.19952e-05	0.000519165
AT5G46330	cdc73.2	TRUE	64.9309	-1.40855	0.387605	-3.63398	0.000279087	0.00423683
AT5G42200	cdc73.2	TRUE	31.6962	1.40816	0.334489	4.20987	2.55518e-05	0.000590332
AT1G64660	cdc73.2	TRUE	374.492	1.4003	0.290628	4.81817	1.44878e-06	5.04349e-05
AT4G09820	cdc73.2	TRUE	28.6119	1.40018	0.306057	4.57489	4.76459e-06	0.000143539
AT1G13990	cdc73.2	TRUE	171.615	1.39973	0.316104	4.42806	9.50839e-06	0.000260369
AT3G11430	cdc73.2	TRUE	212.97	1.39924	0.369328	3.78861	0.000151491	0.00258052
AT1G16510	cdc73.2	TRUE	18.0946	1.39889	0.397872	3.51593	0.000438209	0.00614938
AT4G30270	cdc73.2	TRUE	356.032	-1.39672	0.201621	-6.92747	4.2844e-12	6.19127e-10
AT1G17710	cdc73.2	TRUE	40.6729	-1.3954	0.323256	-4.31669	1.58387e-05	0.000396946
AT1G53170	cdc73.2	TRUE	54.1205	1.39355	0.382245	3.64572	0.000266649	0.00408354
AT4G15910	cdc73.2	TRUE	292.631	1.39095	0.328231	4.23772	2.25803e-05	0.000531535
AT1G61890	cdc73.2	TRUE	1572.55	1.38948	0.234492	5.92548	3.1139e-09	2.32177e-07
AT5G22410	cdc73.2	TRUE	48.6308	-1.38932	0.362372	-3.83394	0.000126105	0.00222186
AT4G36410	cdc73.2	TRUE	26.0674	-1.38841	0.347252	-3.99827	6.38073e-05	0.00127054
AT4G08950	cdc73.2	TRUE	261.218	-1.38188	0.342982	-4.02902	5.60107e-05	0.0011402
AT1G77530	cdc73.2	TRUE	57.5232	-1.3812	0.225021	-6.13808	8.35234e-10	7.10682e-08
AT5G08030	cdc73.2	TRUE	26.7726	-1.37865	0.356204	-3.8704	0.000108659	0.00196815
AT1G34760	cdc73.2	TRUE	21.7652	-1.37852	0.397801	-3.46535	0.000529545	0.00717704
AT1G26450	cdc73.2	TRUE	128.234	1.37642	0.2521	5.45984	4.76574e-08	2.59778e-06
AT2G30550	cdc73.2	TRUE	310.769	1.37576	0.232955	5.9057	3.51155e-09	2.56284e-07
AT3G50560	cdc73.2	TRUE	25.649	-1.37351	0.391803	-3.50561	0.000455559	0.00633678
AT2G32270	cdc73.2	TRUE	68.0019	-1.37119	0.345287	-3.97116	7.15238e-05	0.00139085
AT3G14560	cdc73.2	TRUE	83.8036	1.37052	0.254074	5.39415	6.88478e-08	3.553e-06
AT3G14280	cdc73.2	TRUE	25.8537	1.36961	0.360692	3.79718	0.000146352	0.00250032
AT5G14920	cdc73.2	TRUE	262.169	-1.36934	0.329548	-4.1552	3.24999e-05	0.000714875
AT1G01570	cdc73.2	TRUE	33.2899	1.36902	0.283408	4.83057	1.36143e-06	4.76856e-05
AT2G33330	cdc73.2	TRUE	118.873	-1.36878	0.303235	-4.51392	6.36389e-06	0.000184394
AT3G10340	cdc73.2	TRUE	468.366	1.36757	0.216338	6.32142	2.59169e-10	2.45689e-08
AT1G02920	cdc73.2	TRUE	44.3866	-1.36618	0.463748	-2.94597	0.00321949	0.0305204
AT5G62480	cdc73.2	TRUE	50.0595	1.36548	0.241507	5.65398	1.56774e-08	9.52824e-07
AT5G61790	cdc73.2	TRUE	2334.28	-1.36539	0.302282	-4.51694	6.27407e-06	0.000183314
AT2G22240	cdc73.2	TRUE	470.63	1.36506	0.23979	5.69272	1.25033e-08	7.87344e-07
AT3G06070	cdc73.2	TRUE	31.1618	-1.36343	0.34586	-3.94215	8.07545e-05	0.00154283
AT4G27657	cdc73.2	TRUE	35.3599	1.36057	0.405229	3.35752	0.000786442	0.0098055
AT4G34710	cdc73.2	TRUE	15489	1.35914	0.191821	7.08548	1.38566e-12	2.26386e-10
AT5G44700	cdc73.2	TRUE	29.6777	-1.35723	0.310939	-4.36495	1.27151e-05	0.00032809
AT3G08870	cdc73.2	TRUE	40.4639	1.35354	0.326088	4.15085	3.31245e-05	0.000726781
AT5G61820	cdc73.2	TRUE	2913.98	1.35235	0.249359	5.42328	5.85147e-08	3.09295e-06
AT1G29660	cdc73.2	TRUE	828.707	-1.35212	0.324477	-4.16706	3.08547e-05	0.000687355
AT5G41040	cdc73.2	TRUE	219.528	1.35129	0.186223	7.25627	3.97904e-13	7.71181e-11
AT4G30460	cdc73.2	TRUE	278.024	1.35114	0.198309	6.8133	9.53822e-12	1.28973e-09
AT2G37580	cdc73.2	TRUE	51.896	1.35035	0.244632	5.5199	3.39201e-08	1.921e-06
AT5G66650	cdc73.2	TRUE	77.985	1.35004	0.264163	5.11064	3.21073e-07	1.37604e-05
AT1G22160	cdc73.2	TRUE	62.1484	1.34135	0.317153	4.22936	2.34357e-05	0.000548709
AT5G17860	cdc73.2	TRUE	296.619	1.33833	0.325617	4.11014	3.95415e-05	0.000851509
AT1G05530	cdc73.2	TRUE	26.3068	1.33802	0.325849	4.10624	4.02144e-05	0.000864931
AT1G73880	cdc73.2	TRUE	144.056	1.33642	0.249686	5.35238	8.6803e-08	4.36342e-06
AT1G19380	cdc73.2	TRUE	28.2264	-1.33561	0.379585	-3.51862	0.0004338	0.00611415
AT1G61340	cdc73.2	TRUE	68.378	1.33441	0.289869	4.60348	4.15486e-06	0.000127819
AT5G60680	cdc73.2	TRUE	483.217	1.33438	0.33407	3.99433	6.48778e-05	0.00128452
AT5G09520	cdc73.2	TRUE	73.8925	1.33415	0.327706	4.07119	4.67745e-05	0.000978282
AT1G20030	cdc73.2	TRUE	148.888	1.33281	0.199107	6.69393	2.1726e-11	2.72638e-09
AT1G01720	cdc73.2	TRUE	857.246	1.33058	0.264319	5.03397	4.80428e-07	1.92646e-05
AT2G31110	cdc73.2	TRUE	30.5079	-1.3294	0.291213	-4.56505	4.9937e-06	0.000148644
AT5G26280	cdc73.2	TRUE	710.238	-1.32912	0.306511	-4.33629	1.44905e-05	0.000366847
AT2G16380	cdc73.2	TRUE	36.511	-1.32871	0.301843	-4.40198	1.0727e-05	0.000284614
AT3G22840	cdc73.2	TRUE	324.671	1.32785	0.251938	5.27055	1.36017e-07	6.3778e-06
AT5G64510	cdc73.2	TRUE	38.8397	-1.32745	0.33445	-3.96906	7.21575e-05	0.00140005
AT2G06850	cdc73.2	TRUE	1004.32	-1.3266	0.242095	-5.47965	4.26167e-08	2.34499e-06
AT1G61560	cdc73.2	TRUE	52.4371	-1.3261	0.300506	-4.41289	1.02e-05	0.000272881
AT3G19930	cdc73.2	TRUE	523.478	-1.32535	0.270981	-4.89092	1.00364e-06	3.68558e-05
AT5G63130	cdc73.2	TRUE	73.3659	1.3238	0.289085	4.57926	4.66621e-06	0.000141319
AT3G14840	cdc73.2	TRUE	520.502	-1.3214	0.288099	-4.58661	4.50492e-06	0.000137376
AT4G14270	cdc73.2	TRUE	115.257	1.32113	0.337191	3.91804	8.9271e-05	0.00167077
AT5G03350	cdc73.2	TRUE	30.4141	-1.32089	0.294231	-4.48928	7.14628e-06	0.000204348
AT4G22610	cdc73.2	TRUE	52.3299	-1.32068	0.332127	-3.97642	6.99617e-05	0.00136351
AT5G10730	cdc73.2	TRUE	96.4503	1.31709	0.259974	5.06624	4.05753e-07	1.66923e-05
AT1G72800	cdc73.2	TRUE	18.7149	1.31546	0.440858	2.98385	0.00284643	0.0279878
AT5G26220	cdc73.2	TRUE	76.7662	1.31531	0.23939	5.4944	3.92047e-08	2.18481e-06
AT4G09500	cdc73.2	TRUE	164.326	1.31431	0.173586	7.57153	3.68854e-14	9.46165e-12
AT5G52882	cdc73.2	TRUE	212.579	-1.31388	0.249158	-5.27329	1.34003e-07	6.30032e-06
AT5G16530	cdc73.2	TRUE	46.4462	-1.31302	0.318415	-4.1236	3.73001e-05	0.000809235
AT3G23800	cdc73.2	TRUE	17.9047	-1.31249	0.352236	-3.72616	0.000194416	0.00313843
AT1G58340	cdc73.2	TRUE	170.258	1.31204	0.227397	5.76979	7.93696e-09	5.2869e-07
AT4G38420	cdc73.2	TRUE	208.613	-1.31176	0.232209	-5.64906	1.61324e-08	9.73692e-07
AT1G20440	cdc73.2	TRUE	4054.24	1.31032	0.195647	6.69736	2.12223e-11	2.70205e-09
AT2G37460	cdc73.2	TRUE	87.9882	-1.3066	0.374123	-3.49244	0.000478622	0.00660491
AT2G29460	cdc73.2	TRUE	41.5385	1.30533	0.357969	3.6465	0.000265836	0.00407468
AT1G68570	cdc73.2	TRUE	975.701	1.30223	0.318826	4.08445	4.41808e-05	0.000936387
AT2G18050	cdc73.2	TRUE	18.7862	1.30083	0.439378	2.9606	0.00307036	0.0295238
AT1G75500	cdc73.2	TRUE	1223.63	-1.30013	0.312269	-4.16351	3.13394e-05	0.000695487
AT3G62040	cdc73.2	TRUE	44.961	-1.29904	0.235246	-5.52205	3.35075e-08	1.90382e-06
AT5G36180	cdc73.2	TRUE	43.7107	-1.29871	0.330889	-3.92492	8.67575e-05	0.00163072
AT4G12730	cdc73.2	TRUE	1782.2	-1.29803	0.266945	-4.86252	1.15904e-06	4.17708e-05
AT1G72416	cdc73.2	TRUE	54.8153	-1.29686	0.232819	-5.57024	2.54394e-08	1.49407e-06
AT1G12845	cdc73.2	TRUE	57.0647	1.29662	0.249755	5.19158	2.08515e-07	9.39826e-06
AT3G16530	cdc73.2	TRUE	48.7523	-1.29501	0.354129	-3.65689	0.000255293	0.0039322
AT3G45710	cdc73.2	TRUE	135.291	-1.29475	0.317253	-4.08111	4.48208e-05	0.000944214
AT1G57990	cdc73.2	TRUE	114.717	-1.29374	0.204167	-6.3367	2.34741e-10	2.2622e-08
AT2G38940	cdc73.2	TRUE	446.836	-1.29323	0.222161	-5.82112	5.8453e-09	3.97884e-07
AT4G39955	cdc73.2	TRUE	109.694	1.29289	0.231568	5.58322	2.36107e-08	1.39608e-06
AT5G19875	cdc73.2	TRUE	87.0385	1.29209	0.211893	6.09785	1.07504e-09	8.84527e-08
AT3G14067	cdc73.2	TRUE	6678.61	1.29206	0.267708	4.82639	1.39028e-06	4.85986e-05
AT1G72930	cdc73.2	TRUE	60.8739	-1.29197	0.30503	-4.23557	2.27976e-05	0.000535927
AT5G63850	cdc73.2	TRUE	560.969	-1.29177	0.287031	-4.50046	6.78053e-06	0.000195816
AT5G39610	cdc73.2	TRUE	43.8853	1.29091	0.292444	4.41422	1.01373e-05	0.000272039
AT2G41210	cdc73.2	TRUE	111.867	1.2885	0.215085	5.99064	2.09022e-09	1.61326e-07
AT2G40370	cdc73.2	TRUE	162.329	1.28787	0.310586	4.14658	3.37473e-05	0.000739515
AT3G15780	cdc73.2	TRUE	31.07	1.28664	0.349579	3.68053	0.00023275	0.00365095
AT2G23130	cdc73.2	TRUE	335.288	-1.28662	0.200731	-6.40968	1.4583e-10	1.48755e-08
AT2G42790	cdc73.2	TRUE	426.365	1.28659	0.250546	5.13515	2.81924e-07	1.2294e-05
AT1G75030	cdc73.2	TRUE	37.478	1.28511	0.326567	3.93521	8.31225e-05	0.00157427
AT5G47550	cdc73.2	TRUE	97.4353	1.28508	0.246746	5.20811	1.90769e-07	8.6656e-06
AT5G43150	cdc73.2	TRUE	347.391	1.28184	0.329817	3.88652	0.000101691	0.00186323
AT1G02220	cdc73.2	TRUE	41.0301	1.28159	0.347206	3.69115	0.000223246	0.00352609
AT3G57680	cdc73.2	TRUE	41.7635	1.28092	0.300909	4.25682	2.07351e-05	0.000493428
AT4G01750	cdc73.2	TRUE	84.4826	-1.27932	0.293777	-4.35473	1.33228e-05	0.000339395
AT3G09390	cdc73.2	TRUE	624.346	1.27461	0.315434	4.04081	5.32673e-05	0.00109311
AT3G21330	cdc73.2	TRUE	20.4431	-1.27411	0.389829	-3.26839	0.00108163	0.0126794
AT3G14595	cdc73.2	TRUE	166.125	1.27342	0.324499	3.92426	8.69975e-05	0.00163347
AT3G11690	cdc73.2	TRUE	323.505	1.27285	0.22487	5.66038	1.51039e-08	9.24411e-07
AT5G01880	cdc73.2	TRUE	90.7302	1.2727	0.26855	4.73917	2.1459e-06	7.0359e-05
AT4G36610	cdc73.2	TRUE	60.0077	1.27199	0.249503	5.0981	3.43088e-07	1.44553e-05
AT4G31360	cdc73.2	TRUE	23.2195	-1.27032	0.306484	-4.14481	3.40092e-05	0.000743388
AT4G01680	cdc73.2	TRUE	24.1749	-1.2699	0.30008	-4.23186	2.31768e-05	0.000543378
AT1G08930	cdc73.2	TRUE	444.895	-1.26944	0.252219	-5.0331	4.82621e-07	1.93081e-05
AT5G57530	cdc73.2	TRUE	40.3489	-1.26885	0.401513	-3.16018	0.00157673	0.017363
AT5G53970	cdc73.2	TRUE	245.245	1.26742	0.266158	4.76191	1.91768e-06	6.37146e-05
AT2G43570	cdc73.2	TRUE	57.7069	1.26232	0.313085	4.03188	5.53322e-05	0.00112884
AT3G26330	cdc73.2	TRUE	70.8038	-1.26197	0.323455	-3.90154	9.55817e-05	0.00177177
AT3G23510	cdc73.2	TRUE	49.616	-1.25997	0.236893	-5.31873	1.04493e-07	5.13427e-06
AT5G25440	cdc73.2	TRUE	15.1298	-1.25659	0.408977	-3.07253	0.00212252	0.0221267
AT4G19230	cdc73.2	TRUE	367.575	1.25441	0.255844	4.90302	9.43723e-07	3.49498e-05
AT5G65140	cdc73.2	TRUE	98.6151	1.25361	0.267933	4.67884	2.88504e-06	9.19997e-05
AT2G04350	cdc73.2	TRUE	1353.68	1.2521	0.242526	5.16275	2.43344e-07	1.07732e-05
AT2G41870	cdc73.2	TRUE	352.451	1.24851	0.178401	6.99832	2.59042e-12	3.96357e-10
AT2G17230	cdc73.2	TRUE	433.838	-1.24792	0.372216	-3.35267	0.000800351	0.00997181
AT5G66460	cdc73.2	TRUE	181.002	1.24759	0.237328	5.25681	1.46579e-07	6.78192e-06
AT4G32480	cdc73.2	TRUE	142.21	-1.24734	0.313446	-3.97942	6.90837e-05	0.00134941
AT3G20300	cdc73.2	TRUE	251.01	1.24698	0.23972	5.2018	1.9737e-07	8.94212e-06
AT1G07040	cdc73.2	TRUE	89.5585	1.2454	0.22042	5.6501	1.60355e-08	9.71206e-07
AT4G14130	cdc73.2	TRUE	36.8286	-1.24534	0.332512	-3.74524	0.000180219	0.00297497
AT5G05410	cdc73.2	TRUE	140.669	1.24408	0.280935	4.42836	9.49502e-06	0.000260369
AT1G21670	cdc73.2	TRUE	414.064	1.24396	0.259348	4.79648	1.61476e-06	5.49049e-05
AT5G03190	cdc73.2	TRUE	233.416	1.2436	0.212845	5.84277	5.13386e-09	3.56773e-07
AT5G23220	cdc73.2	TRUE	116.335	1.24295	0.228689	5.43513	5.47559e-08	2.91191e-06
AT1G02390	cdc73.2	TRUE	78.3057	1.24232	0.286863	4.3307	1.48639e-05	0.00037521
AT4G32920	cdc73.2	TRUE	1477.63	1.23743	0.211205	5.85891	4.65928e-09	3.27709e-07
AT1G63260	cdc73.2	TRUE	46.218	-1.23547	0.28886	-4.27706	1.89379e-05	0.000457857
AT5G20400	cdc73.2	TRUE	37.969	-1.23482	0.275448	-4.48294	7.36231e-06	0.000209838
AT4G30610	cdc73.2	TRUE	190.086	-1.23292	0.281122	-4.38571	1.15607e-05	0.000303239
AT1G15800	cdc73.2	TRUE	44.9191	1.23233	0.299704	4.11183	3.92536e-05	0.000847401
AT3G59850	cdc73.2	TRUE	40.0076	1.23034	0.344079	3.57574	0.000349232	0.00511904
AT4G20820	cdc73.2	TRUE	83.6947	1.22891	0.280917	4.37463	1.21638e-05	0.000315264
AT5G51550	cdc73.2	TRUE	477.635	-1.22887	0.278892	-4.40627	1.05167e-05	0.000279639
AT5G62470	cdc73.2	TRUE	254.578	1.22875	0.18572	6.61613	3.68734e-11	4.28789e-09
AT4G17550	cdc73.2	TRUE	880.602	1.22833	0.240676	5.10367	3.33134e-07	1.41513e-05
AT5G02540	cdc73.2	TRUE	24.1019	-1.22795	0.303679	-4.04359	5.26392e-05	0.00108277
AT3G48520	cdc73.2	TRUE	321.298	1.22792	0.380409	3.22789	0.00124706	0.0142732
AT1G31320	cdc73.2	TRUE	34.964	-1.22769	0.277197	-4.42893	9.47034e-06	0.000260144
AT3G09770	cdc73.2	TRUE	619.112	1.22738	0.160097	7.66648	1.76783e-14	4.9736e-12
AT5G13330	cdc73.2	TRUE	92.6828	1.22563	0.268388	4.56665	4.95582e-06	0.000148275
AT2G34510	cdc73.2	TRUE	223.084	-1.22446	0.265954	-4.60405	4.14349e-06	0.000127694
AT5G22920	cdc73.2	TRUE	167.285	-1.22357	0.335946	-3.64215	0.000270369	0.00412602
AT1G02816	cdc73.2	TRUE	118.881	1.22354	0.212127	5.76796	8.02347e-09	5.2869e-07
AT3G51895	cdc73.2	TRUE	269.084	1.22339	0.252589	4.8434	1.27636e-06	4.50679e-05
AT1G59780	cdc73.2	TRUE	21.3461	-1.22204	0.343473	-3.55788	0.000373861	0.00540286
AT1G77200	cdc73.2	TRUE	48.8395	1.22099	0.25601	4.7693	1.84869e-06	6.15394e-05
AT2G22200	cdc73.2	TRUE	49.1895	1.21991	0.260631	4.6806	2.8603e-06	9.1563e-05
AT2G41200	cdc73.2	TRUE	58.5621	1.219	0.231518	5.26523	1.40016e-07	6.54771e-06
AT1G33340	cdc73.2	TRUE	26.996	-1.21834	0.279169	-4.36417	1.27606e-05	0.00032878
AT5G57900	cdc73.2	TRUE	149.108	1.21747	0.270831	4.4953	6.94707e-06	0.000199634
AT4G23050	cdc73.2	TRUE	531.179	1.2162	0.21486	5.66042	1.51005e-08	9.24411e-07
AT1G60750	cdc73.2	TRUE	28.2103	1.21592	0.345209	3.52229	0.000427843	0.0060428
AT3G13610	cdc73.2	TRUE	35.9068	-1.21577	0.265555	-4.57823	4.6892e-06	0.000141511
AT1G08500	cdc73.2	TRUE	39.023	1.21574	0.305068	3.98514	6.74412e-05	0.00132293
AT5G48070	cdc73.2	TRUE	57.7139	-1.21551	0.341428	-3.56008	0.000370747	0.00537568
AT1G75170	cdc73.2	TRUE	51.6341	1.21447	0.275511	4.40805	1.04307e-05	0.000278199
AT3G14590	cdc73.2	TRUE	111.094	1.21423	0.246784	4.92023	8.64443e-07	3.2219e-05
AT1G13420	cdc73.2	TRUE	34.9139	-1.21386	0.250366	-4.84834	1.24501e-06	4.43197e-05
AT1G53430	cdc73.2	TRUE	332.273	-1.21309	0.301854	-4.0188	5.84957e-05	0.00118232
AT1G22370	cdc73.2	TRUE	114.96	1.21141	0.282245	4.29205	1.77034e-05	0.000430684
AT1G55990	cdc73.2	TRUE	262.176	1.2112	0.339462	3.568	0.000359711	0.00525058
AT5G15350	cdc73.2	TRUE	300.294	-1.2078	0.25726	-4.69486	2.66786e-06	8.63366e-05
AT2G34810	cdc73.2	TRUE	1244.74	1.20757	0.360597	3.34881	0.000811591	0.0100923
AT5G02230	cdc73.2	TRUE	292.29	1.20596	0.190191	6.34082	2.28545e-10	2.2271e-08
AT4G29930	cdc73.2	TRUE	82.449	1.20322	0.222626	5.40467	6.49285e-08	3.37068e-06
AT1G76180	cdc73.2	TRUE	1284.52	1.20286	0.180673	6.65767	2.78193e-11	3.36781e-09
AT3G24420	cdc73.2	TRUE	203.992	1.20202	0.20985	5.72802	1.0161e-08	6.56678e-07
AT1G11210	cdc73.2	TRUE	32.3734	1.20109	0.286282	4.19548	2.723e-05	0.000622507
AT2G32800	cdc73.2	TRUE	642.177	1.20068	0.202673	5.9242	3.1382e-09	2.32177e-07
AT3G48690	cdc73.2	TRUE	930.907	1.19965	0.190551	6.2957	3.06011e-10	2.83923e-08
AT1G67360	cdc73.2	TRUE	310.816	1.19799	0.151977	7.8827	3.20374e-15	1.14046e-12
AT5G57560	cdc73.2	TRUE	154.608	-1.19713	0.312462	-3.83128	0.000127479	0.00222807
AT2G16720	cdc73.2	TRUE	46.338	1.19654	0.291647	4.10272	4.08329e-05	0.000876075
AT5G47990	cdc73.2	TRUE	673.743	-1.19467	0.374596	-3.18922	0.00142658	0.0160128
AT3G24460	cdc73.2	TRUE	276.995	1.19464	0.323548	3.69231	0.000222228	0.00351434
AT1G54890	cdc73.2	TRUE	28.7466	-1.19354	0.31037	-3.84554	0.000120287	0.00214366
AT5G28540	cdc73.2	TRUE	2112.68	-1.19306	0.345592	-3.45223	0.000555968	0.00745419
AT4G37400	cdc73.2	TRUE	90.1225	-1.19277	0.299159	-3.98707	6.68934e-05	0.00131547
AT5G54710	cdc73.2	TRUE	73.4219	-1.19192	0.285046	-4.18151	2.89583e-05	0.000650927
AT3G59340	cdc73.2	TRUE	22.2974	-1.1915	0.403567	-2.95243	0.00315288	0.0301346
AT4G24130	cdc73.2	TRUE	114.365	1.19083	0.195183	6.10108	1.05352e-09	8.70927e-08
AT5G25190	cdc73.2	TRUE	29.376	-1.19076	0.327159	-3.63969	0.000272971	0.00415846
AT5G22580	cdc73.2	TRUE	25.6386	-1.18859	0.310158	-3.8322	0.000127004	0.00222646
AT4G18340	cdc73.2	TRUE	71.6568	-1.18831	0.393339	-3.02109	0.00251865	0.0252342
AT1G14210	cdc73.2	TRUE	67.4478	-1.18737	0.299266	-3.96759	7.26017e-05	0.00140554
AT2G31585	cdc73.2	TRUE	31.9772	1.18736	0.286413	4.14561	3.38904e-05	0.000741719
AT3G55290	cdc73.2	TRUE	51.0197	1.1866	0.282951	4.19366	2.7449e-05	0.000626692
AT1G53560	cdc73.2	TRUE	120.156	1.18654	0.208625	5.68741	1.28982e-08	8.09294e-07
AT4G36900	cdc73.2	TRUE	82.5255	1.18637	0.263868	4.49608	6.92182e-06	0.000199237
AT1G68050	cdc73.2	TRUE	25.3908	1.18588	0.355136	3.33922	0.000840153	0.0103714
AT5G64430	cdc73.2	TRUE	219.478	1.18321	0.249374	4.74473	2.08785e-06	6.87138e-05
AT1G22640	cdc73.2	TRUE	157.615	1.18241	0.295125	4.00646	6.1635e-05	0.0012315
AT5G39050	cdc73.2	TRUE	547.922	1.18213	0.3003	3.9365	8.26793e-05	0.00156929
AT1G67365	cdc73.2	TRUE	16.1142	1.18146	0.393929	2.99917	0.00270715	0.0268186
AT2G25220	cdc73.2	TRUE	20.5795	-1.18139	0.319583	-3.69667	0.000218447	0.00346082
AT1G08290	cdc73.2	TRUE	19.1953	1.17946	0.338801	3.48128	0.000499015	0.00685379
AT3G24300	cdc73.2	TRUE	342.189	-1.17929	0.235537	-5.00683	5.53346e-07	2.17878e-05
AT1G78290	cdc73.2	TRUE	38.9623	-1.17863	0.277798	-4.24275	2.20798e-05	0.000520456
AT3G27870	cdc73.2	TRUE	164.685	1.17819	0.169825	6.9377	3.98521e-12	5.89102e-10
AT1G02640	cdc73.2	TRUE	147.571	-1.17801	0.307165	-3.83512	0.000125504	0.00221801
AT2G39180	cdc73.2	TRUE	77.8383	-1.1772	0.293755	-4.00743	6.13827e-05	0.00122786
AT3G07350	cdc73.2	TRUE	426.388	1.17689	0.398384	2.95416	0.00313519	0.0300149
AT5G54080	cdc73.2	TRUE	113.764	1.17689	0.259766	4.53058	5.88226e-06	0.000173152
AT2G34020	cdc73.2	TRUE	51.9699	-1.17576	0.238373	-4.93244	8.12078e-07	3.03972e-05
AT1G69295	cdc73.2	TRUE	648.441	1.1753	0.224434	5.23674	1.63436e-07	7.48244e-06
AT1G14430	cdc73.2	TRUE	49.078	-1.17483	0.257104	-4.56947	4.88951e-06	0.000146543
AT1G25230	cdc73.2	TRUE	113.464	-1.17385	0.2336	-5.02505	5.03304e-07	2.00896e-05
AT5G04250	cdc73.2	TRUE	96.8649	1.17276	0.223077	5.25721	1.46257e-07	6.78192e-06
AT4G29110	cdc73.2	TRUE	48.117	1.17199	0.274525	4.26916	1.96213e-05	0.000471425
AT5G41740	cdc73.2	TRUE	87.7836	-1.16753	0.288074	-4.05287	5.05933e-05	0.00105067
AT4G35790	cdc73.2	TRUE	1560.15	1.16721	0.168406	6.93096	4.17983e-12	6.12679e-10
AT5G51160	cdc73.2	TRUE	18.0286	1.16669	0.341042	3.42096	0.000624005	0.00814101
AT4G15490	cdc73.2	TRUE	465.202	1.16668	0.239978	4.86159	1.16444e-06	4.1879e-05
AT4G27730	cdc73.2	TRUE	88.28	-1.16622	0.225588	-5.16968	2.34491e-07	1.04343e-05
AT1G21110	cdc73.2	TRUE	69.7096	-1.16561	0.254564	-4.57885	4.67537e-06	0.000141339
AT4G22270	cdc73.2	TRUE	62.154	1.16537	0.229243	5.08356	3.70423e-07	1.54947e-05
AT4G17280	cdc73.2	TRUE	113.748	1.16138	0.321311	3.61449	0.000300937	0.00449422
AT3G22200	cdc73.2	TRUE	1198.04	1.16027	0.208652	5.56081	2.68529e-08	1.55613e-06
AT5G49630	cdc73.2	TRUE	85.582	-1.15986	0.275195	-4.2147	2.5011e-05	0.000580915
AT5G63160	cdc73.2	TRUE	233.468	1.15926	0.24064	4.81741	1.45437e-06	5.04349e-05
AT4G15390	cdc73.2	TRUE	70.5228	-1.15874	0.232042	-4.99369	5.92379e-07	2.29619e-05
AT1G49720	cdc73.2	TRUE	112.491	1.15801	0.196749	5.88573	3.96291e-09	2.8564e-07
AT4G04695	cdc73.2	TRUE	15.8751	-1.15797	0.359891	-3.21755	0.0012929	0.0147111
AT2G44580	cdc73.2	TRUE	23.243	-1.15758	0.298896	-3.87285	0.00010757	0.00195452
AT1G54540	cdc73.2	TRUE	35.7799	1.15721	0.309408	3.74008	0.000183963	0.00301303
AT1G28670	cdc73.2	TRUE	157.653	-1.1569	0.195393	-5.92091	3.20165e-09	2.34648e-07
AT1G17870	cdc73.2	TRUE	99.385	1.15657	0.307074	3.76642	0.000165604	0.00278021
AT2G27550	cdc73.2	TRUE	84.3641	1.15612	0.298575	3.87213	0.000107888	0.00195827
AT2G40475	cdc73.2	TRUE	227.399	1.15513	0.210352	5.49139	3.98786e-08	2.20826e-06
AT4G39770	cdc73.2	TRUE	31.9735	-1.15248	0.268039	-4.29967	1.71051e-05	0.00042165
AT5G55930	cdc73.2	TRUE	127.447	-1.15248	0.261481	-4.4075	1.04571e-05	0.000278477
AT1G63420	cdc73.2	TRUE	137.872	1.15216	0.218455	5.27414	1.3338e-07	6.30032e-06
AT1G51940	cdc73.2	TRUE	188.999	-1.15211	0.259828	-4.43413	9.24469e-06	0.00025515
AT5G50720	cdc73.2	TRUE	37.1219	1.15137	0.288193	3.99515	6.46539e-05	0.00128154
AT1G05660	cdc73.2	TRUE	71.1193	1.15075	0.284706	4.04191	5.30186e-05	0.00108929
AT1G14185	cdc73.2	TRUE	40.9596	-1.15057	0.366953	-3.13545	0.00171588	0.018567
AT4G34230	cdc73.2	TRUE	1108.69	1.15031	0.211226	5.44588	5.15504e-08	2.76675e-06
AT1G59640	cdc73.2	TRUE	23.7063	1.14983	0.318605	3.60896	0.000307427	0.00457548
AT5G51460	cdc73.2	TRUE	106.394	-1.1472	0.202141	-5.67526	1.38478e-08	8.65164e-07
AT1G53580	cdc73.2	TRUE	410.59	1.14618	0.238911	4.79751	1.60648e-06	5.4795e-05
AT1G65490	cdc73.2	TRUE	46.3533	-1.14594	0.334463	-3.42621	0.000612063	0.00802723
AT2G41312	cdc73.2	TRUE	40.6478	1.14388	0.250851	4.55999	5.11567e-06	0.000152015
AT4G12090	cdc73.2	TRUE	25.6743	-1.14371	0.370287	-3.08872	0.0020102	0.0210721
AT1G14730	cdc73.2	TRUE	134	1.14371	0.250072	4.57351	4.79629e-06	0.000144244
AT4G31860	cdc73.2	TRUE	332.602	1.14262	0.241054	4.7401	2.13614e-06	7.01708e-05
AT2G47550	cdc73.2	TRUE	40.1022	-1.14174	0.325414	-3.50857	0.00045053	0.00629191
AT3G10910	cdc73.2	TRUE	132.459	1.1417	0.207014	5.51511	3.48563e-08	1.96128e-06
AT5G54840	cdc73.2	TRUE	134.094	1.14018	0.211507	5.39072	7.01741e-08	3.61076e-06
AT1G31010	cdc73.2	TRUE	14.3035	-1.13978	0.395077	-2.88495	0.00391482	0.0353265
AT1G67300	cdc73.2	TRUE	363.414	1.13919	0.189341	6.01661	1.78106e-09	1.38692e-07
AT4G01740	cdc73.2	TRUE	25.8099	-1.13904	0.330375	-3.44773	0.000565329	0.00752751
AT2G18170	cdc73.2	TRUE	156.463	1.13864	0.287901	3.95497	7.65434e-05	0.00146881
AT1G56650	cdc73.2	TRUE	134.12	1.13802	0.209974	5.41982	5.96605e-08	3.13451e-06
AT5G23950	cdc73.2	TRUE	28.231	1.13645	0.357973	3.17469	0.00149994	0.016654
AT5G16200	cdc73.2	TRUE	21.353	1.13375	0.393614	2.88035	0.00397228	0.035679
AT2G02810	cdc73.2	TRUE	81.3736	-1.13314	0.234172	-4.83891	1.30556e-06	4.59129e-05
AT5G57780	cdc73.2	TRUE	21.7955	-1.133	0.345858	-3.27591	0.00105321	0.0124045
AT2G37900	cdc73.2	TRUE	25.7922	1.13273	0.3561	3.18093	0.00146801	0.0163515
AT2G45630	cdc73.2	TRUE	79.6742	1.13253	0.207567	5.45623	4.86358e-08	2.63283e-06
AT4G33050	cdc73.2	TRUE	69.4153	-1.13222	0.318404	-3.55594	0.000376633	0.00543494
AT5G62020	cdc73.2	TRUE	138.439	1.13179	0.226223	5.00298	5.64493e-07	2.21269e-05
AT5G57880	cdc73.2	TRUE	15.5877	-1.13095	0.371341	-3.04559	0.00232225	0.0236745
AT3G09940	cdc73.2	TRUE	83.4531	-1.13082	0.223712	-5.0548	4.30839e-07	1.75587e-05
AT2G31730	cdc73.2	TRUE	18.3852	-1.1291	0.398793	-2.8313	0.00463589	0.040111
AT2G18230	cdc73.2	TRUE	92.5104	1.12906	0.20851	5.4149	6.1323e-08	3.20231e-06
AT1G75880	cdc73.2	TRUE	85.1606	1.12852	0.340604	3.31331	0.000922002	0.011099
AT4G36540	cdc73.2	TRUE	95.2386	-1.1278	0.345373	-3.26546	0.00109286	0.012717
AT1G30260	cdc73.2	TRUE	43.4739	1.1277	0.271126	4.15931	3.19204e-05	0.000703015
AT5G60780	cdc73.2	TRUE	28.4158	-1.12758	0.340136	-3.31509	0.000916149	0.0110693
AT4G02180	cdc73.2	TRUE	15.7032	-1.1253	0.379361	-2.96631	0.00301394	0.029142
AT3G18950	cdc73.2	TRUE	94.8888	1.12413	0.245435	4.58014	4.64674e-06	0.000141208
AT4G33540	cdc73.2	TRUE	254.02	1.12398	0.166037	6.76945	1.29273e-11	1.72131e-09
AT5G49280	cdc73.2	TRUE	183.869	1.12397	0.191972	5.85487	4.77373e-09	3.33073e-07
AT1G02360	cdc73.2	TRUE	161.627	-1.12369	0.261396	-4.29881	1.71716e-05	0.000422387
AT1G51800	cdc73.2	TRUE	265.748	-1.12324	0.320978	-3.49944	0.000466243	0.0064699
AT1G28960	cdc73.2	TRUE	245.549	1.123	0.225004	4.99103	6.00593e-07	2.32287e-05
AT4G35560	cdc73.2	TRUE	148.213	1.12293	0.163205	6.88049	5.96486e-12	8.39074e-10
AT4G30960	cdc73.2	TRUE	3049.29	1.12291	0.225375	4.98239	6.28032e-07	2.42362e-05
AT1G66470	cdc73.2	TRUE	15.3622	1.12203	0.397848	2.82025	0.00479859	0.0411311
AT1G70170	cdc73.2	TRUE	98.2287	1.12115	0.25748	4.35432	1.33478e-05	0.000339395
AT1G79970	cdc73.2	TRUE	415.62	1.12066	0.169574	6.6087	3.87713e-11	4.44926e-09
AT1G29230	cdc73.2	TRUE	20.9209	1.12066	0.338016	3.31539	0.000915141	0.0110693
AT3G56880	cdc73.2	TRUE	328.02	1.12012	0.286755	3.90618	9.37653e-05	0.00174552
AT4G15233	cdc73.2	TRUE	49.9709	-1.11996	0.29381	-3.81186	0.000137923	0.00237023
AT1G69600	cdc73.2	TRUE	33.7002	1.11995	0.291937	3.83625	0.000124925	0.00221001
AT1G72680	cdc73.2	TRUE	117.738	1.11983	0.265134	4.22364	2.40392e-05	0.000560583
AT4G22666	cdc73.2	TRUE	26.9054	-1.11909	0.403118	-2.77609	0.00550177	0.0460717
AT5G44680	cdc73.2	TRUE	110.089	-1.11559	0.273175	-4.0838	4.43043e-05	0.000937863
AT4G38860	cdc73.2	TRUE	128.323	-1.11413	0.225661	-4.93717	7.92631e-07	2.97971e-05
AT4G21600	cdc73.2	TRUE	33.2187	-1.1135	0.272867	-4.08075	4.48899e-05	0.000944529
AT5G17760	cdc73.2	TRUE	164.676	1.1113	0.290655	3.82343	0.00013161	0.00228425
AT1G76990	cdc73.2	TRUE	403.197	-1.11089	0.15397	-7.21501	5.39318e-13	9.79929e-11
AT5G48490	cdc73.2	TRUE	94.5495	-1.10978	0.274991	-4.0357	5.44406e-05	0.00111326
AT3G53960	cdc73.2	TRUE	164.247	1.10964	0.253038	4.38525	1.15855e-05	0.000303431
AT2G16700	cdc73.2	TRUE	51.8391	1.10799	0.263907	4.1984	2.68804e-05	0.00061613
AT1G06570	cdc73.2	TRUE	529.36	1.10793	0.235583	4.70294	2.56445e-06	8.31443e-05
AT3G19290	cdc73.2	TRUE	250.285	1.10773	0.201551	5.49606	3.88371e-08	2.17127e-06
AT5G19530	cdc73.2	TRUE	102.805	-1.10561	0.20133	-5.49154	3.98444e-08	2.20826e-06
AT5G61590	cdc73.2	TRUE	88.568	-1.1056	0.313315	-3.52871	0.000417593	0.00593648
AT3G25717	cdc73.2	TRUE	61.2851	-1.10418	0.276791	-3.98921	6.62925e-05	0.00130512
AT4G22240	cdc73.2	TRUE	857.64	1.10378	0.214365	5.14907	2.61776e-07	1.14728e-05
AT5G24090	cdc73.2	TRUE	86.6959	1.10378	0.215189	5.12934	2.90767e-07	1.25852e-05
AT4G06534	cdc73.2	TRUE	168.208	1.10342	0.249236	4.4272	9.54627e-06	0.000260996
AT3G26290	cdc73.2	TRUE	576.703	1.10276	0.264538	4.16864	3.06422e-05	0.000683494
AT5G08250	cdc73.2	TRUE	88.0685	1.10225	0.319866	3.44598	0.000568994	0.00756625
AT5G38240	cdc73.2	TRUE	24.6345	1.10217	0.335796	3.28227	0.00102974	0.0121692
AT5G10100	cdc73.2	TRUE	52.5313	1.10168	0.282998	3.89291	9.90486e-05	0.00181864
AT3G49580	cdc73.2	TRUE	42.0441	1.10046	0.262638	4.19003	2.78915e-05	0.000629946
AT1G22400	cdc73.2	TRUE	198.998	-1.09969	0.293369	-3.7485	0.000177893	0.00295241
AT5G64410	cdc73.2	TRUE	314.611	-1.09894	0.284558	-3.86193	0.000112494	0.00202501
AT5G04080	cdc73.2	TRUE	25.9898	1.09769	0.370982	2.95887	0.00308767	0.0296413
AT1G01250	cdc73.2	TRUE	40.1024	1.09529	0.309837	3.53503	0.000407727	0.00581519
AT5G04340	cdc73.2	TRUE	250.149	1.09495	0.384302	2.84919	0.00438309	0.0384087
AT2G15960	cdc73.2	TRUE	81.4597	1.09456	0.306952	3.56589	0.000362629	0.00527991
AT4G33040	cdc73.2	TRUE	41.2942	1.09449	0.352036	3.10902	0.00187712	0.0199772
AT4G16190	cdc73.2	TRUE	2174.8	1.0928	0.185953	5.87676	4.18386e-09	2.99095e-07
AT3G15790	cdc73.2	TRUE	79.9448	1.09219	0.2006	5.4446	5.1921e-08	2.77809e-06
AT5G24940	cdc73.2	TRUE	19.926	1.09208	0.368409	2.96432	0.00303355	0.0292506
AT4G13130	cdc73.2	TRUE	15.9998	-1.09179	0.3721	-2.93414	0.00334477	0.0314856
AT1G27200	cdc73.2	TRUE	506.321	1.09151	0.228119	4.78481	1.7115e-06	5.77443e-05
AT1G21410	cdc73.2	TRUE	126.261	1.09119	0.227347	4.79968	1.58918e-06	5.43532e-05
AT3G03440	cdc73.2	TRUE	110.403	1.08956	0.252992	4.30671	1.65698e-05	0.00041172
AT3G14310	cdc73.2	TRUE	1562.06	-1.08931	0.329927	-3.30167	0.000961117	0.0114985
AT5G65690	cdc73.2	TRUE	43.196	-1.08874	0.323278	-3.36781	0.000757687	0.00954937
AT4G37530	cdc73.2	TRUE	88.631	-1.08728	0.30015	-3.62247	0.000291804	0.00439925
AT5G43260	cdc73.2	TRUE	71.2913	1.08619	0.327078	3.32088	0.000897334	0.0109165
AT3G10520	cdc73.2	TRUE	42.9359	-1.08591	0.266701	-4.07163	4.66852e-05	0.000977586
AT1G22500	cdc73.2	TRUE	24.7206	-1.08423	0.34276	-3.16323	0.00156031	0.0172038
AT2G42540	cdc73.2	TRUE	1522.63	1.08404	0.324782	3.33774	0.000844637	0.010412
AT3G27270	cdc73.2	TRUE	102.902	1.08383	0.244141	4.43935	9.02307e-06	0.000249824
AT4G18740	cdc73.2	TRUE	29.7974	-1.08245	0.308683	-3.50667	0.000453747	0.00632238
AT5G42020	cdc73.2	TRUE	1841.96	-1.08187	0.310832	-3.48056	0.000500359	0.00686685
AT2G22980	cdc73.2	TRUE	77.6726	-1.08182	0.261525	-4.13658	3.52526e-05	0.00076768
AT1G04980	cdc73.2	TRUE	155.006	-1.07947	0.302083	-3.57341	0.000352364	0.00515196
AT4G34650	cdc73.2	TRUE	115.955	1.07918	0.172218	6.26636	3.69587e-10	3.39301e-08
AT2G21050	cdc73.2	TRUE	208.259	-1.07873	0.217381	-4.96238	6.96334e-07	2.66598e-05
AT5G43910	cdc73.2	TRUE	25.2408	-1.07812	0.284818	-3.7853	0.000153526	0.00261008
AT1G21050	cdc73.2	TRUE	111.905	-1.07746	0.194078	-5.55168	2.82939e-08	1.62346e-06
AT5G60270	cdc73.2	TRUE	94.2553	-1.07696	0.219745	-4.90094	9.5381e-07	3.52485e-05
AT1G53730	cdc73.2	TRUE	358.21	-1.07692	0.276503	-3.89479	9.8282e-05	0.00181028
AT5G22290	cdc73.2	TRUE	77.9006	1.07634	0.287472	3.74415	0.000181008	0.00298142
AT4G16760	cdc73.2	TRUE	2326.88	1.07505	0.188182	5.71282	1.1112e-08	7.09988e-07
AT5G50200	cdc73.2	TRUE	198.81	-1.07422	0.294745	-3.64456	0.000267854	0.00409123
AT1G24575	cdc73.2	TRUE	17.7753	1.07421	0.358039	3.00027	0.00269737	0.0267787
AT3G13750	cdc73.2	TRUE	1738.36	-1.07395	0.297791	-3.60638	0.0003105	0.00460941
AT3G52790	cdc73.2	TRUE	20.9092	1.07287	0.341653	3.14023	0.00168815	0.0183124
AT3G46110	cdc73.2	TRUE	24.5976	1.07283	0.35077	3.05851	0.00222444	0.0228914
AT4G38730	cdc73.2	TRUE	148.048	1.07116	0.209888	5.10349	3.33438e-07	1.41513e-05
AT5G19410	cdc73.2	TRUE	81.1978	1.06995	0.270909	3.94948	7.83216e-05	0.00149963
AT2G25620	cdc73.2	TRUE	381.107	1.06899	0.180429	5.92467	3.12927e-09	2.32177e-07
AT5G09225	cdc73.2	TRUE	29.4868	1.0681	0.315893	3.38121	0.000721686	0.00916184
AT1G14360	cdc73.2	TRUE	200.525	-1.06806	0.216378	-4.93608	7.97076e-07	2.98998e-05
AT1G58270	cdc73.2	TRUE	2904.48	1.06763	0.318634	3.35066	0.000806199	0.0100375
AT5G39090	cdc73.2	TRUE	17.1868	1.06689	0.366966	2.90732	0.0036454	0.0335196
AT4G01140	cdc73.2	TRUE	15.2191	-1.06678	0.376813	-2.83106	0.0046394	0.0401215
AT1G77690	cdc73.2	TRUE	282.56	-1.06629	0.249651	-4.27111	1.94499e-05	0.000468597
AT5G16360	cdc73.2	TRUE	51.7975	1.06582	0.243743	4.37273	1.227e-05	0.000317075
AT4G16750	cdc73.2	TRUE	56.8639	1.06525	0.282585	3.76967	0.000163466	0.00274959
AT5G08020	cdc73.2	TRUE	36.0286	-1.06515	0.292229	-3.6449	0.000267493	0.00408929
AT1G56430	cdc73.2	TRUE	55.0498	-1.06495	0.213135	-4.9966	5.83514e-07	2.27193e-05
AT4G33610	cdc73.2	TRUE	304.184	1.06487	0.344981	3.08676	0.00202352	0.0211862
AT1G18710	cdc73.2	TRUE	96.7699	1.06477	0.301339	3.53344	0.000410183	0.00584544
AT5G44390	cdc73.2	TRUE	44.8816	-1.06442	0.358104	-2.97236	0.00295517	0.0287651
AT2G19060	cdc73.2	TRUE	33.9992	-1.0637	0.350509	-3.03474	0.00240744	0.0243706
AT5G09620	cdc73.2	TRUE	431.14	1.06362	0.232985	4.56518	4.99071e-06	0.000148644
AT5G60520	cdc73.2	TRUE	41.6048	1.06347	0.325294	3.26925	0.00107835	0.0126579
AT4G26320	cdc73.2	TRUE	23.1984	-1.06314	0.331833	-3.20384	0.00135606	0.0153
AT2G41170	cdc73.2	TRUE	279.658	1.06313	0.213485	4.9799	6.36187e-07	2.44967e-05
AT3G01430	cdc73.2	TRUE	30.5917	1.06281	0.320762	3.31337	0.000921777	0.011099
AT1G67920	cdc73.2	TRUE	21.6287	1.0625	0.372618	2.85144	0.00435223	0.0382255
AT1G09460	cdc73.2	TRUE	70.0397	-1.06148	0.293473	-3.61696	0.000298083	0.00446517
AT3G05936	cdc73.2	TRUE	19.5891	1.06145	0.317946	3.33847	0.000842413	0.0103919
AT5G53990	cdc73.2	TRUE	49.4493	1.06126	0.254998	4.16184	3.15698e-05	0.000698822
AT5G16600	cdc73.2	TRUE	27.2757	1.06123	0.311651	3.4052	0.000661152	0.0084985
AT3G50350	cdc73.2	TRUE	45.8724	-1.06063	0.255464	-4.1518	3.29868e-05	0.000724672
AT4G04955	cdc73.2	TRUE	92.936	-1.06035	0.207933	-5.09947	3.40601e-07	1.43852e-05
AT1G73680	cdc73.2	TRUE	273.546	1.06019	0.238593	4.4435	8.85071e-06	0.000245833
AT3G44510	cdc73.2	TRUE	16.8471	-1.05996	0.355553	-2.98115	0.00287167	0.028125
AT1G62510	cdc73.2	TRUE	339.249	1.05979	0.221031	4.79475	1.62877e-06	5.52736e-05
AT1G79270	cdc73.2	TRUE	552.984	1.05753	0.188679	5.60491	2.08359e-08	1.24511e-06
AT3G15200	cdc73.2	TRUE	18.9799	1.05714	0.36539	2.89319	0.00381356	0.0345558
AT4G17650	cdc73.2	TRUE	148.376	1.05644	0.282608	3.73818	0.00018536	0.00302454
AT3G49940	cdc73.2	TRUE	204.773	-1.05607	0.244147	-4.32556	1.52145e-05	0.000382954
AT1G63010	cdc73.2	TRUE	1014.33	1.05535	0.157639	6.69475	2.16037e-11	2.72638e-09
AT5G49900	cdc73.2	TRUE	105.022	1.05507	0.212876	4.95625	7.18678e-07	2.72841e-05
AT1G08230	cdc73.2	TRUE	218.38	1.05457	0.19732	5.34446	9.06868e-08	4.54555e-06
AT5G04310	cdc73.2	TRUE	47.0866	-1.05439	0.281487	-3.74577	0.00017984	0.00297341
AT2G39250	cdc73.2	TRUE	171.225	1.05436	0.167555	6.29263	3.1213e-10	2.88068e-08
AT1G10480	cdc73.2	TRUE	28.0802	1.05237	0.307572	3.42154	0.000622674	0.00813005
AT3G08630	cdc73.2	TRUE	146.196	1.0514	0.192712	5.4558	4.87533e-08	2.63283e-06
AT2G38120	cdc73.2	TRUE	820.8	-1.05136	0.236259	-4.45005	8.58522e-06	0.00023922
AT1G13650	cdc73.2	TRUE	87.0112	-1.0501	0.243847	-4.30639	1.6594e-05	0.000411735
AT3G51350	cdc73.2	TRUE	20.3025	-1.04933	0.347505	-3.0196	0.00253112	0.02533
AT3G54680	cdc73.2	TRUE	118.874	1.04889	0.19831	5.28911	1.22913e-07	5.89724e-06
AT4G17840	cdc73.2	TRUE	807.078	1.0478	0.283508	3.69586	0.000219147	0.00346876
AT1G78610	cdc73.2	TRUE	781.603	1.04777	0.217496	4.8174	1.45438e-06	5.04349e-05
AT5G56520	cdc73.2	TRUE	55.4506	1.04717	0.349418	2.99691	0.00272734	0.0269688
AT5G44400	cdc73.2	TRUE	96.8538	-1.04686	0.330446	-3.16804	0.00153472	0.0169538
AT3G54420	cdc73.2	TRUE	77.9553	-1.04635	0.331781	-3.15372	0.00161202	0.0176333
AT5G57610	cdc73.2	TRUE	822.802	1.04621	0.175196	5.97167	2.34833e-09	1.78873e-07
AT1G17550	cdc73.2	TRUE	537.981	1.04617	0.170574	6.13322	8.61165e-10	7.2919e-08
AT2G19670	cdc73.2	TRUE	31.2514	-1.04412	0.327373	-3.18938	0.00142578	0.0160128
AT4G31000	cdc73.2	TRUE	47.1661	-1.04274	0.245559	-4.2464	2.17228e-05	0.000513429
AT2G29320	cdc73.2	TRUE	50.7425	-1.04264	0.232962	-4.47557	7.62072e-06	0.000215617
AT5G11160	cdc73.2	TRUE	42.7313	-1.04255	0.268755	-3.87918	0.00010481	0.00191636
AT1G11190	cdc73.2	TRUE	53.4572	1.04191	0.323801	3.21774	0.00129203	0.0147108
AT1G23040	cdc73.2	TRUE	135.171	1.04126	0.194046	5.36606	8.04742e-08	4.06873e-06
AT4G19680	cdc73.2	TRUE	34.4175	-1.04024	0.339288	-3.06595	0.00216981	0.0224884
AT3G44540	cdc73.2	TRUE	80.3891	1.04011	0.214607	4.84657	1.25615e-06	4.45522e-05
AT4G29520	cdc73.2	TRUE	117.894	-1.03798	0.3335	-3.11238	0.00185583	0.0198085
AT1G11170	cdc73.2	TRUE	45.7598	1.03696	0.323921	3.20128	0.00136817	0.0154267
AT4G38470	cdc73.2	TRUE	296.68	-1.03689	0.181317	-5.71863	1.07388e-08	6.88665e-07
AT5G46830	cdc73.2	TRUE	26.5504	1.03645	0.287339	3.60708	0.00030966	0.00460085
AT1G50960	cdc73.2	TRUE	21.2019	1.03573	0.374319	2.76697	0.00565799	0.047086
AT5G14700	cdc73.2	TRUE	79.9475	1.03535	0.26354	3.92863	8.54314e-05	0.00160753
AT2G23600	cdc73.2	TRUE	209.255	-1.03531	0.204731	-5.0569	4.26124e-07	1.74072e-05
AT1G58370	cdc73.2	TRUE	62.7564	-1.03523	0.241929	-4.27906	1.87684e-05	0.000455323
AT1G04040	cdc73.2	TRUE	200.465	-1.03295	0.322031	-3.20762	0.00133839	0.0151693
AT2G15970	cdc73.2	TRUE	4992.37	1.03226	0.247959	4.16301	3.14077e-05	0.000696117
AT4G15340	cdc73.2	TRUE	38.0251	-1.03214	0.275767	-3.7428	0.000181982	0.00298899
AT1G47840	cdc73.2	TRUE	29.0247	-1.03198	0.286444	-3.60273	0.000314894	0.00465877
AT3G24463	cdc73.2	TRUE	48.2759	1.03185	0.297655	3.46658	0.00052712	0.00716087
AT1G78970	cdc73.2	TRUE	65.2412	-1.03063	0.221293	-4.65732	3.20351e-06	0.00010076
AT4G11220	cdc73.2	TRUE	398.963	1.03043	0.214652	4.80046	1.583e-06	5.42479e-05
AT5G48000	cdc73.2	TRUE	348.012	-1.03028	0.263917	-3.90382	9.46865e-05	0.00175704
AT4G01360	cdc73.2	TRUE	19.7844	1.03007	0.326807	3.15193	0.00162197	0.0177047
AT3G63210	cdc73.2	TRUE	288.285	1.0295	0.209009	4.92561	8.40986e-07	3.14118e-05
AT1G31770	cdc73.2	TRUE	270.374	-1.0294	0.244037	-4.21819	2.46267e-05	0.000572751
AT5G52900	cdc73.2	TRUE	81.5871	-1.02924	0.264684	-3.88856	0.000100839	0.00184957
AT2G42380	cdc73.2	TRUE	171.82	-1.02747	0.1894	-5.42486	5.8001e-08	3.07511e-06
AT1G04180	cdc73.2	TRUE	22.7692	1.02731	0.308521	3.32979	0.000869127	0.0106462
AT5G13910	cdc73.2	TRUE	21.6788	1.02592	0.372428	2.75468	0.00587496	0.0484524
AT1G27150	cdc73.2	TRUE	200.234	1.02554	0.177804	5.76778	8.03204e-09	5.2869e-07
AT2G46890	cdc73.2	TRUE	60.9506	-1.0252	0.271003	-3.78297	0.000154971	0.00262697
AT5G64230	cdc73.2	TRUE	106.588	1.02484	0.273745	3.74377	0.000181281	0.0029831
AT4G16146	cdc73.2	TRUE	28.3323	1.02472	0.279816	3.66213	0.000250127	0.00386788
AT3G18730	cdc73.2	TRUE	39.543	-1.02427	0.268185	-3.81926	0.00013385	0.00231622
AT4G01920	cdc73.2	TRUE	26.4858	-1.02207	0.278443	-3.67067	0.000241916	0.00376444
AT4G25670	cdc73.2	TRUE	184.644	1.02138	0.233344	4.37716	1.20235e-05	0.000312534
AT5G06930	cdc73.2	TRUE	25.7962	-1.02074	0.31796	-3.21026	0.00132613	0.0150401
AT3G29810	cdc73.2	TRUE	22.8772	-1.02059	0.355867	-2.8679	0.00413211	0.0368112
AT5G45920	cdc73.2	TRUE	58.106	1.02013	0.297904	3.42435	0.000616283	0.00807044
AT3G04070	cdc73.2	TRUE	73.7454	1.01927	0.284819	3.57866	0.000345367	0.00506664
AT5G01820	cdc73.2	TRUE	1340.24	1.01834	0.195367	5.21243	1.86378e-07	8.48824e-06
AT1G54000	cdc73.2	TRUE	563.331	-1.01817	0.25755	-3.95328	7.70874e-05	0.00147762
AT2G40130	cdc73.2	TRUE	62.1906	1.01697	0.254535	3.9954	6.45856e-05	0.00128154
AT5G01200	cdc73.2	TRUE	27.6431	1.01681	0.352474	2.88477	0.003917	0.035328
AT3G05400	cdc73.2	TRUE	134.163	1.01678	0.24562	4.13967	3.47813e-05	0.000758363
AT3G16360	cdc73.2	TRUE	22.5626	1.01642	0.34105	2.98028	0.00287986	0.0281893
AT5G48010	cdc73.2	TRUE	662.452	-1.01518	0.199292	-5.09395	3.50681e-07	1.47396e-05
AT4G34860	cdc73.2	TRUE	105.595	1.01502	0.257748	3.93802	8.21561e-05	0.00156595
AT4G21830	cdc73.2	TRUE	40.396	-1.01444	0.256041	-3.96202	7.43193e-05	0.00143085
AT1G24070	cdc73.2	TRUE	408.53	1.01329	0.190105	5.33013	9.81415e-08	4.89673e-06
AT2G35940	cdc73.2	TRUE	381.201	1.01293	0.185001	5.47529	4.36787e-08	2.39587e-06
AT4G38840	cdc73.2	TRUE	121.086	-1.01236	0.219034	-4.62192	3.80206e-06	0.000117796
AT1G05950	cdc73.2	TRUE	29.0161	-1.01183	0.300361	-3.36872	0.000755175	0.0095246
AT5G37550	cdc73.2	TRUE	18.8018	1.01124	0.356113	2.83967	0.00451604	0.0392688
AT1G26930	cdc73.2	TRUE	116.921	1.01024	0.186585	5.41438	6.15017e-08	3.20231e-06
AT2G21180	cdc73.2	TRUE	82.4438	1.00988	0.255196	3.95727	7.58106e-05	0.00145635
AT1G07150	cdc73.2	TRUE	42.5625	1.00961	0.284109	3.5536	0.000379998	0.00547794
AT5G16190	cdc73.2	TRUE	64.0881	-1.00949	0.306703	-3.29141	0.00099686	0.0118451
AT4G19390	cdc73.2	TRUE	72.8258	1.00904	0.249382	4.04617	5.2063e-05	0.00107472
AT4G11190	cdc73.2	TRUE	70.7194	-1.00767	0.353264	-2.85246	0.00433825	0.0381412
AT1G04830	cdc73.2	TRUE	151.738	1.00676	0.223008	4.51447	6.34762e-06	0.000184229
AT1G22900	cdc73.2	TRUE	37.4587	-1.0056	0.32225	-3.12056	0.0018051	0.0193406
AT2G26355	cdc73.2	TRUE	40.5732	1.0051	0.25743	3.90438	9.44666e-05	0.0017567
AT4G09030	cdc73.2	TRUE	98.8105	1.00498	0.229224	4.38429	1.16363e-05	0.000304305
AT5G03230	cdc73.2	TRUE	240.603	1.00488	0.226722	4.43223	9.32614e-06	0.000256587
AT1G02660	cdc73.2	TRUE	331.671	1.00423	0.27499	3.65188	0.00026033	0.00399618
AT1G33790	cdc73.2	TRUE	66.183	-1.00341	0.227135	-4.41769	9.97607e-06	0.000268953
AT5G64550	cdc73.2	TRUE	165.403	1.00288	0.25328	3.95957	7.50854e-05	0.00144401
AT4G16563	cdc73.2	TRUE	175.23	-1.00261	0.352808	-2.84181	0.00448586	0.0390991
AT1G15460	cdc73.2	TRUE	42.5637	1.00205	0.330329	3.03349	0.00241743	0.0244448
AT1G29025	cdc73.2	TRUE	74.6574	-1.00187	0.341671	-2.93227	0.00336489	0.0316238
AT1G28260	cdc73.2	TRUE	120.404	1.00173	0.219411	4.56555	4.98197e-06	0.000148644
AT2G07680	cdc73.2	TRUE	203.573	-1.00173	0.272965	-3.66982	0.000242723	0.00377346
AT5G05850	cdc73.2	TRUE	68.6799	1.00072	0.238767	4.1912	2.77483e-05	0.000629946
AT1G21100	cdc73.2	TRUE	107.248	-1.00065	0.258668	-3.86846	0.000109524	0.00198163
AT1G66200	cdc73.2	TRUE	1143.48	-1.00045	0.138478	-7.2246	5.02573e-13	9.22776e-11

## Sheet: elf7-3_DEGs_saltVSctrl
geneID	genotype	.abundant	baseMean	log2FoldChange	lfcSE	stat	pvalue	padj
AT5G52300	elf7.3	TRUE	1139.33	2.79841	0.374157	7.47923	7.47568e-14	9.31576e-11
AT3G02480	elf7.3	TRUE	351.133	2.78661	0.359786	7.74517	9.54573e-15	1.51395e-11
AT5G02760	elf7.3	TRUE	47.2101	-2.68327	0.6774	-3.96112	7.45977e-05	0.00334558
AT5G50360	elf7.3	TRUE	238.169	2.6794	0.437134	6.12946	8.81772e-10	2.90253e-07
AT1G52690	elf7.3	TRUE	464.321	2.43702	0.357084	6.82478	8.80609e-12	5.60703e-09
AT3G15670	elf7.3	TRUE	86.0177	2.38037	0.307906	7.73083	1.06849e-14	1.5534e-11
AT5G40800	elf7.3	TRUE	112.971	2.33936	0.370575	6.31279	2.74056e-10	1.1119e-07
AT5G66400	elf7.3	TRUE	1006.05	2.29842	0.162942	14.1058	3.49749e-45	6.10172e-41
AT4G12470	elf7.3	TRUE	97.3555	-2.27219	0.457191	-4.96989	6.69908e-07	7.84377e-05
AT1G24580	elf7.3	TRUE	172.917	2.24186	0.329855	6.79652	1.07179e-11	6.23281e-09
AT2G47770	elf7.3	TRUE	624.525	2.20504	0.581925	3.78922	0.000151121	0.00565762
AT2G18480	elf7.3	TRUE	57.2828	2.20464	0.573774	3.84234	0.000121866	0.00479925
AT3G03341	elf7.3	TRUE	121.111	2.15011	0.364506	5.89871	3.66352e-09	9.53936e-07
AT2G36780	elf7.3	TRUE	156.063	2.1436	0.503867	4.2543	2.097e-05	0.0012114
AT1G56600	elf7.3	TRUE	202.344	2.12878	0.395958	5.37629	7.60373e-08	1.37683e-05
AT5G06760	elf7.3	TRUE	1008.58	2.07599	0.445805	4.65673	3.21275e-06	0.000268691
AT5G59310	elf7.3	TRUE	194.945	2.05718	0.512583	4.01336	5.98606e-05	0.0027701
AT5G03210	elf7.3	TRUE	162.149	2.03963	0.311587	6.54593	5.91267e-11	2.94721e-08
AT2G41190	elf7.3	TRUE	2615.74	2.0203	0.459185	4.39976	1.08373e-05	0.000705473
AT4G19690	elf7.3	TRUE	38.2624	-1.99784	0.477452	-4.18437	2.85963e-05	0.00155698
AT5G40790	elf7.3	TRUE	114.549	1.98121	0.271062	7.30906	2.69022e-13	2.93335e-10
AT4G33905	elf7.3	TRUE	174.092	1.97639	0.45612	4.33305	1.47057e-05	0.00091301
AT3G48510	elf7.3	TRUE	125.203	1.95431	0.385812	5.06543	4.07481e-07	5.59757e-05
AT1G69490	elf7.3	TRUE	78.6032	1.95426	0.287181	6.80497	1.01069e-11	6.08017e-09
AT2G19810	elf7.3	TRUE	322.909	1.95246	0.266345	7.33058	2.29151e-13	2.66518e-10
AT5G01520	elf7.3	TRUE	666.456	1.93842	0.275993	7.02344	2.16467e-12	1.88825e-09
AT1G21270	elf7.3	TRUE	21.8375	-1.93521	0.472621	-4.09464	4.22832e-05	0.00207212
AT4G12480	elf7.3	TRUE	64.9523	-1.9079	0.293264	-6.50576	7.73022e-11	3.6449e-08
AT3G48240	elf7.3	TRUE	55.3703	1.90322	0.380663	4.99975	5.74043e-07	7.10266e-05
AT4G02280	elf7.3	TRUE	662.868	1.89076	0.300645	6.28899	3.19532e-10	1.21186e-07
AT5G47980	elf7.3	TRUE	37.455	-1.87492	0.47907	-3.91365	9.09096e-05	0.00378522
AT1G05100	elf7.3	TRUE	501.639	1.87339	0.469026	3.99421	6.49098e-05	0.00296444
AT1G07430	elf7.3	TRUE	671.788	1.85367	0.535125	3.46399	0.00053222	0.0146684
AT5G54585	elf7.3	TRUE	85.6052	1.83282	0.261263	7.01522	2.29586e-12	1.90731e-09
AT5G62340	elf7.3	TRUE	40.2904	-1.83177	0.466421	-3.92729	8.59082e-05	0.00367342
AT1G60190	elf7.3	TRUE	1581.33	1.8264	0.462405	3.94978	7.8223e-05	0.00345488
AT5G02020	elf7.3	TRUE	182.56	1.81492	0.292577	6.20324	5.5311e-10	2.01033e-07
AT1G07985	elf7.3	TRUE	93.2534	1.80334	0.3392	5.31643	1.0582e-07	1.75823e-05
AT1G05340	elf7.3	TRUE	106.335	1.7977	0.295973	6.07387	1.24866e-09	3.89002e-07
AT1G03790	elf7.3	TRUE	124.306	1.79323	0.490275	3.6576	0.000254588	0.00850382
AT5G59220	elf7.3	TRUE	3537.52	1.77152	0.502881	3.52273	0.000427124	0.0125027
AT2G45570	elf7.3	TRUE	79.1866	1.74677	0.557223	3.13478	0.00171981	0.0358469
AT5G65730	elf7.3	TRUE	137.818	-1.74487	0.455948	-3.82691	0.000129763	0.00501959
AT4G00970	elf7.3	TRUE	30.9281	-1.74164	0.365089	-4.77045	1.83811e-06	0.00016728
AT3G55840	elf7.3	TRUE	39.8899	1.71221	0.411103	4.16492	3.11464e-05	0.00166681
AT4G27657	elf7.3	TRUE	37.6965	1.71186	0.308366	5.55139	2.834e-08	5.95686e-06
AT1G16400	elf7.3	TRUE	236.862	-1.69446	0.373735	-4.53386	5.79142e-06	0.000424525
AT1G69260	elf7.3	TRUE	1315.3	1.69446	0.384465	4.40732	1.0466e-05	0.000691626
AT1G73830	elf7.3	TRUE	48.119	-1.69231	0.514806	-3.28728	0.00101161	0.0239139
AT4G27410	elf7.3	TRUE	1509.05	1.69077	0.418957	4.03567	5.44466e-05	0.00258118
AT1G72760	elf7.3	TRUE	104.893	1.68932	0.464224	3.63903	0.000273667	0.00892409
AT1G16390	elf7.3	TRUE	43.6979	-1.67392	0.475757	-3.51845	0.000434077	0.0126621
AT3G15500	elf7.3	TRUE	45.4443	1.65889	0.371458	4.46588	7.97406e-06	0.000552045
AT2G42530	elf7.3	TRUE	72.0607	1.65704	0.290923	5.6958	1.22797e-08	2.89502e-06
AT1G64110	elf7.3	TRUE	82.0223	1.64972	0.264129	6.24588	4.2141e-10	1.56424e-07
AT3G02410	elf7.3	TRUE	43.4482	1.64951	0.364855	4.52098	6.15529e-06	0.000441914
AT5G17460	elf7.3	TRUE	423.559	1.63654	0.298258	5.48701	4.08801e-08	8.19764e-06
AT3G44990	elf7.3	TRUE	677.572	-1.6343	0.206561	-7.91195	2.53384e-15	4.42054e-12
AT3G06355	elf7.3	TRUE	415.832	1.62433	0.414109	3.92248	8.76432e-05	0.00371404
AT1G77120	elf7.3	TRUE	291.996	1.62393	0.503927	3.22254	0.00127059	0.0283825
AT4G22666	elf7.3	TRUE	21.4194	-1.62156	0.395247	-4.10265	4.08441e-05	0.0020129
AT3G63060	elf7.3	TRUE	188.388	1.61457	0.48673	3.31718	0.000909306	0.0219416
AT1G80110	elf7.3	TRUE	187.81	1.6078	0.388691	4.13644	3.5273e-05	0.00182063
AT5G44260	elf7.3	TRUE	44.0759	1.58145	0.367534	4.30287	1.68601e-05	0.00101779
AT4G13770	elf7.3	TRUE	998.193	-1.57649	0.225476	-6.99183	2.71326e-12	2.15162e-09
AT4G29190	elf7.3	TRUE	394.72	1.5458	0.203782	7.58557	3.31021e-14	4.4423e-11
AT3G14440	elf7.3	TRUE	1519.92	1.54544	0.44605	3.46473	0.000530767	0.0146515
AT2G41090	elf7.3	TRUE	80.8056	-1.54238	0.387106	-3.98438	6.76553e-05	0.00307373
AT4G37160	elf7.3	TRUE	80.0886	-1.5412	0.2488	-6.1945	5.84693e-10	2.04011e-07
AT4G21440	elf7.3	TRUE	72.501	1.52811	0.507351	3.01195	0.00259576	0.0472206
AT3G19580	elf7.3	TRUE	204.641	1.51528	0.312824	4.84388	1.2733e-06	0.000125503
AT3G16530	elf7.3	TRUE	57.5987	-1.51519	0.466027	-3.2513	0.00114881	0.0264148
AT1G77450	elf7.3	TRUE	702.87	1.50943	0.280952	5.37254	7.76349e-08	1.37873e-05
AT1G03870	elf7.3	TRUE	239.715	-1.50884	0.310429	-4.86049	1.17096e-06	0.000119466
AT4G34380	elf7.3	TRUE	54.4644	1.49245	0.338836	4.40462	1.05969e-05	0.000697636
AT5G47640	elf7.3	TRUE	293.878	1.48234	0.15112	9.80905	1.02934e-22	8.97897e-19
AT2G47780	elf7.3	TRUE	145.043	1.48024	0.476003	3.10972	0.00187265	0.0380773
AT3G27250	elf7.3	TRUE	787.736	1.48004	0.274939	5.38317	7.31836e-08	1.34396e-05
AT5G18130	elf7.3	TRUE	341.989	1.47922	0.221882	6.66669	2.61644e-11	1.38322e-08
AT2G36270	elf7.3	TRUE	47.0402	1.47894	0.296219	4.99274	5.95289e-07	7.26253e-05
AT1G30840	elf7.3	TRUE	35.9273	-1.4771	0.301048	-4.90655	9.26922e-07	9.74162e-05
AT4G19380	elf7.3	TRUE	75.933	-1.47414	0.280464	-5.25607	1.47169e-07	2.31306e-05
AT1G09950	elf7.3	TRUE	31.4403	1.4658	0.372985	3.92991	8.49791e-05	0.00365159
AT3G29575	elf7.3	TRUE	875.137	1.45357	0.294345	4.93833	7.87948e-07	8.92633e-05
AT1G71910	elf7.3	TRUE	39.7094	1.44154	0.366581	3.9324	8.41025e-05	0.00362284
AT2G29460	elf7.3	TRUE	123.303	1.43293	0.274483	5.22048	1.78457e-07	2.70727e-05
AT4G01360	elf7.3	TRUE	23.3288	1.43029	0.374265	3.82158	0.000132598	0.00510662
AT2G33590	elf7.3	TRUE	874.751	1.42789	0.28399	5.02795	4.95758e-07	6.45447e-05
AT3G48020	elf7.3	TRUE	45.0264	1.42766	0.364672	3.91491	9.04384e-05	0.00377461
AT4G05100	elf7.3	TRUE	162.899	1.42273	0.410007	3.47002	0.000520426	0.0144576
AT1G45249	elf7.3	TRUE	1117.9	1.42153	0.288823	4.9218	8.57526e-07	9.35025e-05
AT4G23300	elf7.3	TRUE	118.265	-1.41688	0.209691	-6.75699	1.40887e-11	7.92874e-09
AT4G04570	elf7.3	TRUE	174.18	-1.4128	0.210687	-6.70568	2.00475e-11	1.09297e-08
AT2G37870	elf7.3	TRUE	177.557	1.41208	0.426507	3.31081	0.000930258	0.0222624
AT1G52565	elf7.3	TRUE	48.5105	1.40841	0.404097	3.48533	0.000491525	0.0137864
AT2G02710	elf7.3	TRUE	649.684	1.40645	0.25287	5.56196	2.66762e-08	5.67553e-06
AT3G17000	elf7.3	TRUE	731.754	1.40029	0.222191	6.30217	2.93502e-10	1.13787e-07
AT1G22370	elf7.3	TRUE	124.716	1.39873	0.192697	7.25873	3.90744e-13	3.78718e-10
AT2G40000	elf7.3	TRUE	627.701	1.39757	0.160762	8.69343	3.51662e-18	1.53378e-14
AT1G02660	elf7.3	TRUE	550.477	1.39429	0.37268	3.74124	0.000183112	0.00661402
AT2G36750	elf7.3	TRUE	187.297	1.39283	0.335992	4.14542	3.39193e-05	0.00177173
AT2G30010	elf7.3	TRUE	71.5996	-1.39167	0.380491	-3.65757	0.000254623	0.00850382
AT1G68500	elf7.3	TRUE	53.9692	1.39002	0.305787	4.54572	5.4749e-06	0.000405818
AT2G28400	elf7.3	TRUE	318.706	1.38624	0.409544	3.38483	0.00071222	0.0183265
AT1G49750	elf7.3	TRUE	561.338	-1.3838	0.202854	-6.82167	8.99902e-12	5.60703e-09
AT5G37300	elf7.3	TRUE	29.0297	1.37932	0.433641	3.18078	0.00146878	0.0316949
AT1G17870	elf7.3	TRUE	180.267	1.37621	0.172992	7.95534	1.78643e-15	3.4629e-12
AT5G62360	elf7.3	TRUE	32.0138	-1.37606	0.390839	-3.52078	0.000430277	0.0125739
AT3G11410	elf7.3	TRUE	2528.66	1.3736	0.297727	4.61363	3.95688e-06	0.000312361
AT3G13672	elf7.3	TRUE	70.1845	1.3713	0.368553	3.72076	0.000198624	0.00704309
AT1G02970	elf7.3	TRUE	17.6956	-1.36334	0.413986	-3.2932	0.000990538	0.0234795
AT5G63180	elf7.3	TRUE	85.873	-1.36286	0.216183	-6.30419	2.897e-10	1.13787e-07
AT5G49740	elf7.3	TRUE	148.392	-1.35843	0.330895	-4.10532	4.03764e-05	0.00199918
AT1G27020	elf7.3	TRUE	22.0151	-1.35387	0.4437	-3.05132	0.00227835	0.0432986
AT5G64120	elf7.3	TRUE	270.001	-1.35083	0.339791	-3.97546	7.02419e-05	0.00317471
AT5G63130	elf7.3	TRUE	135.965	1.34927	0.343459	3.92848	8.54842e-05	0.00366427
AT2G46270	elf7.3	TRUE	518.32	1.34612	0.346939	3.87998	0.000104464	0.00425812
AT1G16410	elf7.3	TRUE	476.011	-1.34553	0.234647	-5.73427	9.79306e-09	2.37291e-06
AT4G33150	elf7.3	TRUE	1589.98	1.34513	0.37998	3.54	0.000400131	0.0119124
AT2G46880	elf7.3	TRUE	25.3097	-1.34464	0.448692	-2.99679	0.00272834	0.0488191
AT4G16690	elf7.3	TRUE	219.867	1.34307	0.28168	4.76807	1.86e-06	0.000168132
AT3G10910	elf7.3	TRUE	302.326	1.34192	0.301323	4.45343	8.45098e-06	0.00057368
AT2G46680	elf7.3	TRUE	1100.51	1.34039	0.309202	4.33501	1.45753e-05	0.000908144
AT1G27730	elf7.3	TRUE	82.3635	1.33591	0.24872	5.37115	7.82381e-08	1.37873e-05
AT5G04370	elf7.3	TRUE	85.2379	1.33212	0.372746	3.5738	0.000351834	0.0107686
AT1G53170	elf7.3	TRUE	57.1693	1.33008	0.245753	5.41227	6.22294e-08	1.16737e-05
AT1G60470	elf7.3	TRUE	44.6256	1.3298	0.331862	4.00708	6.14746e-05	0.00282978
AT1G75500	elf7.3	TRUE	897.825	-1.32617	0.166214	-7.97867	1.47917e-15	3.2257e-12
AT2G23630	elf7.3	TRUE	72.3642	-1.32557	0.247462	-5.35667	8.47675e-08	1.45522e-05
AT1G51850	elf7.3	TRUE	95.0591	-1.32508	0.255998	-5.17613	2.26533e-07	3.40697e-05
AT4G14690	elf7.3	TRUE	476.59	1.32446	0.242395	5.46405	4.65379e-08	9.02112e-06
AT4G15248	elf7.3	TRUE	37.6464	1.32122	0.267206	4.94457	7.63132e-07	8.7017e-05
AT1G04247	elf7.3	TRUE	124.966	1.31986	0.295652	4.46422	8.03603e-06	0.000554137
AT3G58990	elf7.3	TRUE	334.348	-1.31788	0.308311	-4.27451	1.91562e-05	0.00112525
AT5G57050	elf7.3	TRUE	752.913	1.3122	0.374813	3.50095	0.0004636	0.0132156
AT2G15960	elf7.3	TRUE	91.6177	1.31086	0.299661	4.37449	1.21718e-05	0.000780696
AT2G39800	elf7.3	TRUE	11919.9	1.31056	0.3417	3.83541	0.000125353	0.0048815
AT3G49110	elf7.3	TRUE	55.0045	-1.30836	0.366473	-3.57015	0.000356773	0.0109006
AT2G18050	elf7.3	TRUE	16.1009	1.30794	0.41976	3.11593	0.00183364	0.0375467
AT5G52910	elf7.3	TRUE	40.4367	-1.30737	0.309844	-4.21944	2.44906e-05	0.00137707
AT3G23920	elf7.3	TRUE	6017.59	1.30578	0.346155	3.77225	0.000161781	0.00596709
AT4G02380	elf7.3	TRUE	540.915	1.29659	0.268793	4.82375	1.40885e-06	0.000135048
AT1G76590	elf7.3	TRUE	68.8022	1.29336	0.307505	4.20598	2.59957e-05	0.00144895
AT2G37460	elf7.3	TRUE	163.499	-1.29277	0.348109	-3.71369	0.00020426	0.00715566
AT1G29640	elf7.3	TRUE	280.598	1.28993	0.266135	4.84689	1.25413e-06	0.000124316
AT1G62570	elf7.3	TRUE	2891.83	1.2896	0.347462	3.71147	0.000206056	0.00720412
AT1G46554	elf7.3	TRUE	49.9743	1.2882	0.264814	4.86456	1.14712e-06	0.000117721
AT3G14210	elf7.3	TRUE	862.89	-1.28749	0.228013	-5.64656	1.63688e-08	3.75751e-06
AT5G04250	elf7.3	TRUE	161.141	1.2851	0.292884	4.38774	1.14535e-05	0.000740068
AT5G15190	elf7.3	TRUE	47.5667	1.28472	0.413702	3.10542	0.00190007	0.0384109
AT1G54120	elf7.3	TRUE	49.5546	1.27976	0.317849	4.02631	5.66595e-05	0.00266437
AT1G18100	elf7.3	TRUE	63.7247	1.2759	0.309142	4.12723	3.67164e-05	0.00187297
AT1G64660	elf7.3	TRUE	670.419	1.26972	0.224707	5.65057	1.59919e-08	3.71993e-06
AT4G14270	elf7.3	TRUE	95.9198	1.26931	0.252547	5.02602	5.00757e-07	6.47126e-05
AT3G61890	elf7.3	TRUE	515.635	1.26886	0.375694	3.37738	0.000731811	0.0187202
AT3G55880	elf7.3	TRUE	172.972	1.26361	0.25254	5.00361	5.62661e-07	7.01156e-05
AT3G57540	elf7.3	TRUE	221.594	1.26302	0.417105	3.02807	0.00246125	0.0457283
AT2G21130	elf7.3	TRUE	43.8299	1.25787	0.244782	5.13874	2.76587e-07	4.05491e-05
AT5G04340	elf7.3	TRUE	369.547	1.25769	0.320717	3.92149	8.80024e-05	0.00371404
AT3G57680	elf7.3	TRUE	67.2061	1.2576	0.294183	4.2749	1.91221e-05	0.00112525
AT1G51140	elf7.3	TRUE	819.675	1.25605	0.223006	5.63237	1.77745e-08	4.02719e-06
AT1G28480	elf7.3	TRUE	30.8519	1.25428	0.329997	3.80089	0.000144177	0.00545622
AT3G18200	elf7.3	TRUE	62.8429	-1.25393	0.326727	-3.83784	0.000124119	0.00485512
AT5G15960	elf7.3	TRUE	717.746	1.25097	0.155025	8.06948	7.05973e-16	1.93202e-12
AT5G23020	elf7.3	TRUE	243.83	-1.24783	0.254219	-4.9085	9.17768e-07	9.70769e-05
AT2G41210	elf7.3	TRUE	115.168	1.24359	0.236408	5.26036	1.43771e-07	2.30113e-05
AT2G25625	elf7.3	TRUE	381.007	1.24209	0.266396	4.66258	3.12267e-06	0.000263179
AT4G31860	elf7.3	TRUE	1026.61	1.23789	0.253072	4.89144	1.00101e-06	0.000104572
AT1G54095	elf7.3	TRUE	25.8192	1.23602	0.363677	3.39869	0.000677097	0.0175522
AT1G73880	elf7.3	TRUE	238.943	1.22907	0.389141	3.15841	0.00158633	0.0335864
AT4G23870	elf7.3	TRUE	93.3263	1.22848	0.270885	4.53508	5.75815e-06	0.000423868
AT1G31173	elf7.3	TRUE	38.2204	-1.22813	0.295427	-4.15712	3.22282e-05	0.00171418
AT4G14750	elf7.3	TRUE	57.7476	-1.22563	0.24836	-4.93489	8.01954e-07	9.02638e-05
AT1G50260	elf7.3	TRUE	791.406	1.22489	0.334737	3.65927	0.000252934	0.00850382
AT1G29660	elf7.3	TRUE	664.949	-1.22327	0.25181	-4.85793	1.18621e-06	0.000119754
AT5G19240	elf7.3	TRUE	123.212	-1.22194	0.244576	-4.99617	5.84792e-07	7.18471e-05
AT1G21400	elf7.3	TRUE	702.566	1.22182	0.349341	3.4975	0.000469645	0.0133226
AT3G07350	elf7.3	TRUE	533.076	1.2191	0.232644	5.24022	1.60387e-07	2.49832e-05
AT5G49730	elf7.3	TRUE	291.105	-1.21865	0.23599	-5.16398	2.41756e-07	3.60484e-05
AT5G49450	elf7.3	TRUE	62.5951	1.21839	0.259331	4.6982	2.62467e-06	0.00022895
AT2G22240	elf7.3	TRUE	729.578	1.21678	0.151002	8.05805	7.75199e-16	1.93202e-12
AT3G05640	elf7.3	TRUE	1131.43	1.2158	0.392186	3.10007	0.00193476	0.0389318
AT5G42380	elf7.3	TRUE	21.3997	1.21466	0.332009	3.65852	0.000253679	0.00850382
AT2G27830	elf7.3	TRUE	213.282	1.21443	0.220202	5.51505	3.48674e-08	7.15643e-06
AT1G18710	elf7.3	TRUE	67.1166	1.20821	0.241459	5.00377	5.62186e-07	7.01156e-05
AT3G15780	elf7.3	TRUE	50.1059	1.20671	0.254892	4.7342	2.19922e-06	0.000196757
AT2G26440	elf7.3	TRUE	60.3076	-1.20412	0.386735	-3.11355	0.00184848	0.0376737
AT5G44130	elf7.3	TRUE	178.278	-1.20308	0.318772	-3.7741	0.000160587	0.0059356
AT4G16750	elf7.3	TRUE	71.7413	1.20232	0.224555	5.35424	8.59155e-08	1.45522e-05
AT3G26330	elf7.3	TRUE	93.971	-1.20202	0.239826	-5.01204	5.3857e-07	6.80862e-05
AT5G14920	elf7.3	TRUE	168.07	-1.20105	0.275519	-4.35921	1.30531e-05	0.000831108
AT2G28780	elf7.3	TRUE	29.9043	-1.19876	0.361328	-3.31765	0.000907767	0.0219348
AT1G30500	elf7.3	TRUE	90.3886	1.19813	0.20553	5.82946	5.56059e-09	1.40594e-06
AT1G52190	elf7.3	TRUE	143.596	-1.1977	0.266653	-4.4916	7.069e-06	0.000501324
AT1G22160	elf7.3	TRUE	104.319	1.19392	0.199574	5.98237	2.19909e-09	6.28938e-07
AT5G23750	elf7.3	TRUE	61.801	1.18992	0.247755	4.8028	1.56461e-06	0.000146753
AT1G13300	elf7.3	TRUE	51.6846	-1.18755	0.341429	-3.47819	0.000504817	0.0140913
AT3G43960	elf7.3	TRUE	71.0071	-1.18698	0.299774	-3.95958	7.50815e-05	0.00335006
AT1G72770	elf7.3	TRUE	2765.15	1.18597	0.312545	3.79457	0.000147898	0.00557285
AT1G02820	elf7.3	TRUE	86.8836	1.18496	0.287345	4.12384	3.72615e-05	0.00188424
AT1G28330	elf7.3	TRUE	149.609	1.18392	0.173066	6.84088	7.87095e-12	5.28141e-09
AT5G60680	elf7.3	TRUE	606.025	1.18364	0.196145	6.03451	1.59447e-09	4.79606e-07
AT5G25240	elf7.3	TRUE	54.8252	1.18244	0.264314	4.47364	7.68988e-06	0.00053663
AT1G21000	elf7.3	TRUE	246.759	1.17918	0.190566	6.18779	6.10134e-10	2.047e-07
AT3G16990	elf7.3	TRUE	138.262	1.17899	0.260364	4.52822	5.94814e-06	0.000431772
AT3G09390	elf7.3	TRUE	974.167	1.17854	0.130181	9.05304	1.39038e-19	8.08555e-16
AT4G23820	elf7.3	TRUE	217.327	-1.17269	0.194429	-6.03146	1.62484e-09	4.80457e-07
AT5G06870	elf7.3	TRUE	319.197	-1.16972	0.198261	-5.89991	3.63708e-09	9.53936e-07
AT4G12430	elf7.3	TRUE	81.9576	1.16881	0.266537	4.38516	1.159e-05	0.000746124
AT5G26146	elf7.3	TRUE	26.8912	1.16798	0.300215	3.89047	0.000100049	0.00409734
AT1G26800	elf7.3	TRUE	71.2424	1.1662	0.279484	4.17271	3.01001e-05	0.00163045
AT1G01520	elf7.3	TRUE	64.1144	1.16594	0.320124	3.64214	0.000270378	0.00883337
AT4G29740	elf7.3	TRUE	32.0241	-1.1635	0.300495	-3.87194	0.000107974	0.00439095
AT4G14130	elf7.3	TRUE	34.4888	-1.16064	0.28379	-4.08978	4.31774e-05	0.00211001
AT5G13330	elf7.3	TRUE	282.895	1.15161	0.326003	3.5325	0.00041165	0.0121847
AT4G27652	elf7.3	TRUE	43.1584	1.15062	0.237676	4.84113	1.29103e-06	0.000126536
AT3G46370	elf7.3	TRUE	22.2387	-1.15038	0.380611	-3.02245	0.00250736	0.0461427
AT4G29520	elf7.3	TRUE	149.282	-1.15004	0.257886	-4.4595	8.21503e-06	0.000559842
AT1G20450	elf7.3	TRUE	4030.57	1.1456	0.33279	3.44242	0.000576526	0.0154978
AT1G68620	elf7.3	TRUE	239.704	1.14534	0.292035	3.92193	8.78413e-05	0.00371404
AT3G50970	elf7.3	TRUE	788.109	1.14484	0.245179	4.66939	3.0209e-06	0.000257086
AT1G12740	elf7.3	TRUE	153.294	-1.14316	0.301331	-3.7937	0.000148421	0.00558051
AT1G62510	elf7.3	TRUE	404.662	1.14283	0.207588	5.50529	3.68562e-08	7.47666e-06
AT1G02810	elf7.3	TRUE	59.3814	-1.14131	0.289366	-3.94419	8.00717e-05	0.00350988
AT3G51750	elf7.3	TRUE	72.8513	1.1353	0.342982	3.31007	0.000932719	0.0222907
AT1G21110	elf7.3	TRUE	51.9601	-1.13256	0.282153	-4.014	5.96973e-05	0.00276989
AT5G11420	elf7.3	TRUE	481.92	-1.13212	0.227742	-4.97107	6.65841e-07	7.84377e-05
AT5G10930	elf7.3	TRUE	492.868	1.13182	0.155265	7.28957	3.10951e-13	3.19108e-10
AT5G48180	elf7.3	TRUE	3970.51	1.13023	0.26125	4.32626	1.51664e-05	0.000938272
AT1G69252	elf7.3	TRUE	446.551	1.12948	0.211151	5.34916	8.8361e-08	1.48226e-05
AT4G36670	elf7.3	TRUE	69.3182	-1.12933	0.330255	-3.41956	0.000627218	0.0165544
AT3G54600	elf7.3	TRUE	374.906	-1.12735	0.212264	-5.3111	1.08964e-07	1.79339e-05
AT5G23420	elf7.3	TRUE	47.63	-1.12646	0.374967	-3.00417	0.00266311	0.0480958
AT1G61340	elf7.3	TRUE	155.245	1.12595	0.248782	4.52583	6.01587e-06	0.000433689
AT2G27550	elf7.3	TRUE	147.064	1.12594	0.214117	5.25853	1.45212e-07	2.30307e-05
AT5G22410	elf7.3	TRUE	68.5772	-1.12241	0.25447	-4.41077	1.03003e-05	0.00068501
AT2G33330	elf7.3	TRUE	80.9947	-1.12163	0.321686	-3.48672	0.000488978	0.013737
AT3G61630	elf7.3	TRUE	156.507	1.11952	0.253147	4.4224	9.76108e-06	0.000658674
AT1G24575	elf7.3	TRUE	18.5057	1.11677	0.368675	3.02914	0.00245251	0.0456146
AT5G35190	elf7.3	TRUE	722.954	-1.11486	0.310668	-3.58858	0.000332481	0.0103211
AT4G13575	elf7.3	TRUE	263.364	-1.11409	0.216321	-5.15016	2.60267e-07	3.84798e-05
AT5G64100	elf7.3	TRUE	875.427	-1.11361	0.291387	-3.82178	0.000132494	0.00510662
AT1G22640	elf7.3	TRUE	274.226	1.11068	0.220434	5.03862	4.68896e-07	6.25715e-05
AT5G46900	elf7.3	TRUE	87.0696	-1.10979	0.251017	-4.42118	9.8163e-06	0.000658674
AT2G34140	elf7.3	TRUE	37.8652	1.10578	0.279784	3.95226	7.74163e-05	0.00343665
AT5G63160	elf7.3	TRUE	239.74	1.10524	0.236154	4.68014	2.86673e-06	0.000247589
AT3G58100	elf7.3	TRUE	32.0426	-1.1032	0.32571	-3.38705	0.000706476	0.0182056
AT3G56880	elf7.3	TRUE	423.36	1.10162	0.169441	6.50152	7.95134e-11	3.6505e-08
AT5G38340	elf7.3	TRUE	31.4775	-1.10083	0.335275	-3.28336	0.00102579	0.024151
AT2G18170	elf7.3	TRUE	292.296	1.09871	0.237373	4.62863	3.68099e-06	0.000298691
AT3G18610	elf7.3	TRUE	18.418	1.09691	0.35021	3.13214	0.00173536	0.0360848
AT3G15760	elf7.3	TRUE	66.1543	1.09514	0.226376	4.83772	1.31339e-06	0.000128007
AT5G43150	elf7.3	TRUE	560.143	1.08882	0.156516	6.9566	3.48589e-12	2.53395e-09
AT3G45710	elf7.3	TRUE	94.7023	-1.08477	0.236268	-4.59125	4.40591e-06	0.000344688
AT4G18440	elf7.3	TRUE	1002.67	-1.08318	0.149379	-7.25123	4.1299e-13	3.79212e-10
AT2G33830	elf7.3	TRUE	35.937	1.08219	0.353346	3.06271	0.00219345	0.0422373
AT5G54240	elf7.3	TRUE	61.3707	1.07835	0.337738	3.19287	0.00140867	0.0308353
AT2G38820	elf7.3	TRUE	166.17	1.07702	0.219422	4.90842	9.18129e-07	9.70769e-05
AT1G73500	elf7.3	TRUE	174.895	1.07683	0.186621	5.77015	7.92031e-09	1.97397e-06
AT5G61790	elf7.3	TRUE	2444.15	-1.07551	0.229891	-4.67833	2.89221e-06	0.00024797
AT1G20720	elf7.3	TRUE	59.9111	-1.07542	0.253594	-4.24071	2.22811e-05	0.00127448
AT3G02020	elf7.3	TRUE	256.139	-1.07446	0.165973	-6.47375	9.55996e-11	4.16958e-08
AT1G73325	elf7.3	TRUE	113.123	-1.0735	0.289566	-3.70729	0.000209488	0.00730945
AT3G10020	elf7.3	TRUE	184.414	1.07018	0.23004	4.65214	3.28512e-06	0.000269335
AT1G49500	elf7.3	TRUE	380.059	1.06656	0.349618	3.05064	0.00228354	0.0433029
AT3G47340	elf7.3	TRUE	118.232	1.06534	0.180331	5.9077	3.46927e-09	9.31153e-07
AT4G24415	elf7.3	TRUE	56.843	1.06483	0.296786	3.58787	0.000333387	0.0103308
AT5G62020	elf7.3	TRUE	264.888	1.06458	0.213536	4.98547	6.18107e-07	7.43689e-05
AT5G53120	elf7.3	TRUE	1313.35	1.06247	0.218743	4.85714	1.19092e-06	0.000119754
AT1G46768	elf7.3	TRUE	44.7709	1.06146	0.2954	3.59329	0.000326533	0.0101909
AT3G05937	elf7.3	TRUE	50.0016	1.06141	0.23273	4.56069	5.0987e-06	0.000383413
AT1G18830	elf7.3	TRUE	22.3439	1.06072	0.318091	3.33465	0.000854057	0.0210153
AT3G14595	elf7.3	TRUE	219.677	1.05983	0.240002	4.41592	1.00579e-05	0.000672301
AT3G57520	elf7.3	TRUE	1852.19	1.05858	0.124786	8.4832	2.19093e-17	7.64458e-14
AT4G01670	elf7.3	TRUE	36.0231	1.05566	0.273095	3.86555	0.000110838	0.00444525
AT2G20590	elf7.3	TRUE	25.9489	-1.05533	0.336075	-3.14016	0.00168857	0.0352799
AT2G37700	elf7.3	TRUE	48.4252	-1.05132	0.332764	-3.15935	0.00158123	0.0335363
AT1G80840	elf7.3	TRUE	40.738	1.05056	0.343517	3.05826	0.00222625	0.0426127
AT1G32450	elf7.3	TRUE	357.012	-1.05041	0.321919	-3.26297	0.00110253	0.025579
AT3G45650	elf7.3	TRUE	107.873	-1.05037	0.283559	-3.70424	0.000212022	0.00736838
AT5G49690	elf7.3	TRUE	51.9809	1.04969	0.350013	2.999	0.00270864	0.0485662
AT4G30960	elf7.3	TRUE	6038.18	1.04829	0.158263	6.62373	3.50256e-11	1.79723e-08
AT5G44020	elf7.3	TRUE	913.583	-1.04809	0.169303	-6.19062	5.99294e-10	2.047e-07
AT2G34020	elf7.3	TRUE	73.7915	-1.04776	0.24062	-4.35443	1.33416e-05	0.000843324
AT3G11690	elf7.3	TRUE	631.754	1.04754	0.223511	4.68673	2.77606e-06	0.000240951
AT4G38060	elf7.3	TRUE	276.372	1.0475	0.273174	3.83457	0.000125784	0.00488737
AT3G03440	elf7.3	TRUE	207.089	1.04625	0.192427	5.43709	5.41566e-08	1.03826e-05
AT4G11190	elf7.3	TRUE	66.8513	-1.04621	0.296812	-3.52482	0.000423778	0.0124465
AT4G34000	elf7.3	TRUE	2252.87	1.04602	0.237603	4.40238	1.07069e-05	0.000699595
AT5G52310	elf7.3	TRUE	8851.62	1.04595	0.252695	4.13919	3.4854e-05	0.00180971
AT3G49580	elf7.3	TRUE	85.5909	1.04394	0.221454	4.71402	2.42875e-06	0.000215086
AT1G13110	elf7.3	TRUE	249.188	-1.04366	0.290306	-3.59502	0.000324372	0.0101416
AT1G23480	elf7.3	TRUE	79.8885	-1.0409	0.264648	-3.93316	8.38353e-05	0.00362028
AT1G77380	elf7.3	TRUE	66.1563	-1.04008	0.321998	-3.23007	0.00123758	0.0278943
AT3G05880	elf7.3	TRUE	447.448	1.03839	0.164135	6.32646	2.50855e-10	1.042e-07
AT1G11440	elf7.3	TRUE	54.5321	-1.03798	0.254769	-4.07422	4.61681e-05	0.00224986
AT5G19040	elf7.3	TRUE	26.0997	-1.03456	0.34222	-3.0231	0.00250203	0.0460934
AT2G27402	elf7.3	TRUE	49.4726	-1.03353	0.336681	-3.06976	0.00214231	0.0414814
AT4G13410	elf7.3	TRUE	200.106	-1.03337	0.184055	-5.61444	1.97197e-08	4.40151e-06
AT3G59550	elf7.3	TRUE	53.2759	-1.03127	0.310507	-3.32126	0.000896134	0.0216837
AT1G20440	elf7.3	TRUE	5748.69	1.03042	0.218758	4.71031	2.47346e-06	0.000217939
AT5G57910	elf7.3	TRUE	56.612	1.02987	0.281543	3.65796	0.000254231	0.00850382
AT3G17640	elf7.3	TRUE	154.477	-1.02948	0.215819	-4.77014	1.84098e-06	0.00016728
AT2G01010	elf7.3	TRUE	451.392	1.02636	0.306606	3.3475	0.000815454	0.0203817
AT3G27640	elf7.3	TRUE	27.0747	-1.02577	0.306792	-3.34353	0.000827197	0.0206185
AT4G12005	elf7.3	TRUE	41.135	1.02549	0.304763	3.36489	0.000765744	0.0194457
AT2G30550	elf7.3	TRUE	594.549	1.0252	0.318466	3.21918	0.00128557	0.0286805
AT2G39040	elf7.3	TRUE	32.5997	-1.02382	0.329996	-3.10253	0.00191876	0.0386621
AT5G54080	elf7.3	TRUE	246.831	1.01953	0.289224	3.52506	0.000423394	0.0124465
AT3G14560	elf7.3	TRUE	103.059	1.01944	0.205845	4.95247	7.32787e-07	8.41066e-05
AT4G33040	elf7.3	TRUE	86.9243	1.01913	0.236216	4.3144	1.60038e-05	0.000983108
AT4G30490	elf7.3	TRUE	315.336	1.01892	0.244224	4.17205	3.01866e-05	0.00163045
AT5G37260	elf7.3	TRUE	48.9385	1.01819	0.313648	3.24628	0.00116922	0.0267342
AT3G54830	elf7.3	TRUE	104.859	-1.01764	0.235349	-4.32394	1.5327e-05	0.000944855
AT2G05540	elf7.3	TRUE	519.838	1.01658	0.255802	3.97406	7.06566e-05	0.0031852
AT4G12730	elf7.3	TRUE	1508.05	-1.01556	0.167515	-6.06251	1.34017e-09	4.10185e-07
AT5G01880	elf7.3	TRUE	119.207	1.01501	0.310193	3.2722	0.00106715	0.0249565
AT1G01720	elf7.3	TRUE	1313.51	1.01496	0.280994	3.61202	0.00030382	0.00960224
AT5G22290	elf7.3	TRUE	128.533	1.01431	0.188706	5.37507	7.65519e-08	1.37683e-05
AT5G64430	elf7.3	TRUE	441.399	1.01405	0.155416	6.52474	6.81175e-11	3.30105e-08
AT2G10940	elf7.3	TRUE	3092.8	-1.01167	0.333932	-3.02956	0.00244908	0.0455994
AT4G12030	elf7.3	TRUE	183.206	-1.00966	0.221455	-4.55923	5.13408e-06	0.000384417
AT1G51790	elf7.3	TRUE	109.808	-1.0093	0.213394	-4.72974	2.24804e-06	0.000200098
AT5G08020	elf7.3	TRUE	59.3236	-1.00924	0.314425	-3.20979	0.00132832	0.0294497
AT1G14520	elf7.3	TRUE	86.6358	1.00884	0.228749	4.41022	1.03266e-05	0.00068501
AT4G01750	elf7.3	TRUE	105.935	-1.0078	0.303071	-3.32529	0.00088325	0.0215212
AT5G62470	elf7.3	TRUE	399.871	1.00768	0.333095	3.02521	0.00248464	0.0459671
AT5G14200	elf7.3	TRUE	619.239	-1.00655	0.19984	-5.03679	4.734e-07	6.25715e-05
AT3G54680	elf7.3	TRUE	277.402	1.00598	0.245013	4.10585	4.02838e-05	0.00199918
AT3G09730	elf7.3	TRUE	30.6625	-1.00524	0.309519	-3.24774	0.00116324	0.0266674
AT4G34710	elf7.3	TRUE	28990.9	1.00524	0.1969	5.10531	3.30251e-07	4.6842e-05
AT5G56850	elf7.3	TRUE	230.188	-1.00494	0.309098	-3.2512	0.00114919	0.0264148
AT1G01470	elf7.3	TRUE	952.177	1.00481	0.219961	4.56812	4.92116e-06	0.000375679
AT2G20560	elf7.3	TRUE	77.4342	1.00455	0.22814	4.40322	1.06655e-05	0.000699512
AT4G10370	elf7.3	TRUE	51.6615	-1.00182	0.276636	-3.62145	0.000292955	0.00941234
AT4G31870	elf7.3	TRUE	74.6374	1.00108	0.236598	4.23115	2.32501e-05	0.00132124
AT1G34040	elf7.3	TRUE	24.8828	-1.001	0.327867	-3.05305	0.00226525	0.0431289

## Sheet: ctrl_DEGs_elf7-3VSCol0
geneID	condition	.abundant	baseMean	log2FoldChange	lfcSE	stat	pvalue	padj
AT4G33970	ctrl	TRUE	59.2821	3.33924	0.315693	10.5775	3.78985e-26	7.34641e-23
AT2G44460	ctrl	TRUE	45.5884	3.2746	0.477827	6.85311	7.22598e-12	2.2333e-09
AT2G33380	ctrl	TRUE	951.66	2.9759	0.44149	6.74058	1.57752e-11	4.56997e-09
AT5G24080	ctrl	TRUE	248.18	2.95996	0.719183	4.11572	3.85971e-05	0.00100087
AT1G21100	ctrl	TRUE	112.463	-2.9312	0.378438	-7.74553	9.5181e-15	4.8839e-12
AT5G05250	ctrl	TRUE	83.5922	-2.91611	0.266896	-10.926	8.65614e-28	2.15736e-24
AT3G03470	ctrl	TRUE	420.672	2.85968	0.769978	3.71397	0.000204032	0.00376226
AT1G74670	ctrl	TRUE	78.3304	-2.76559	0.432534	-6.39393	1.61677e-10	3.24209e-08
AT1G69480	ctrl	TRUE	274.181	2.75542	0.52117	5.28699	1.24346e-07	9.9328e-06
AT1G52100	ctrl	TRUE	243.65	-2.69286	0.191395	-14.0697	5.83454e-45	5.08947e-41
AT3G60160	ctrl	TRUE	96.2486	2.67902	0.539302	4.96757	6.77957e-07	3.96548e-05
AT5G59220	ctrl	TRUE	1012.06	2.67534	0.458725	5.83212	5.47288e-09	7.40155e-07
AT1G72760	ctrl	TRUE	31.5757	2.59236	0.522405	4.96236	6.96411e-07	4.02369e-05
AT3G55090	ctrl	TRUE	202.244	2.59004	0.527834	4.90691	9.25223e-07	4.98052e-05
AT1G77080	ctrl	TRUE	98.7389	-2.5624	0.19871	-12.8952	4.79313e-38	2.78736e-34
AT2G18193	ctrl	TRUE	231.769	2.55015	0.70583	3.61298	0.000302698	0.00507776
AT5G06090	ctrl	TRUE	180.141	2.54987	0.852624	2.99061	0.00278419	0.0255332
AT1G05100	ctrl	TRUE	138.112	2.54545	0.438494	5.80497	6.43767e-09	8.38146e-07
AT5G48490	ctrl	TRUE	125.878	-2.53881	0.467093	-5.43533	5.46937e-08	5.07545e-06
AT4G24340	ctrl	TRUE	85.0167	-2.53194	0.274511	-9.22345	2.87695e-20	2.64165e-17
AT1G60190	ctrl	TRUE	446.477	2.53031	0.414198	6.10895	1.00286e-09	1.59054e-07
AT1G73220	ctrl	TRUE	54.6227	2.52235	0.430062	5.86509	4.48899e-09	6.31373e-07
AT1G02850	ctrl	TRUE	1121.5	2.49472	0.468402	5.32604	1.0038e-07	8.33916e-06
AT2G37770	ctrl	TRUE	339.717	2.48922	0.39233	6.34471	2.22841e-10	4.36818e-08
AT5G11110	ctrl	TRUE	1135.75	2.47546	0.477204	5.18743	2.13218e-07	1.49389e-05
AT5G17760	ctrl	TRUE	319.709	2.44433	0.534597	4.57227	4.82459e-06	0.0001962
AT5G45810	ctrl	TRUE	69.5595	2.42287	0.466491	5.19381	2.06029e-07	1.46963e-05
AT5G48430	ctrl	TRUE	566.399	-2.42272	0.804241	-3.01243	0.00259164	0.0241785
AT1G49450	ctrl	TRUE	262.981	2.41616	0.464015	5.20707	1.91849e-07	1.40042e-05
AT5G13170	ctrl	TRUE	779.18	2.4131	0.522829	4.61547	3.92207e-06	0.000163304
AT1G07430	ctrl	TRUE	189.531	2.40285	0.520127	4.61973	3.84243e-06	0.000160371
AT5G54230	ctrl	TRUE	50.4332	2.40192	0.547276	4.38886	1.13945e-05	0.000386758
AT1G07900	ctrl	TRUE	37.6428	2.40023	0.582826	4.11826	3.81742e-05	0.000994012
AT1G69260	ctrl	TRUE	402.72	2.38738	0.348648	6.84756	7.51221e-12	2.25962e-09
AT3G08860	ctrl	TRUE	211.985	2.38695	0.512403	4.65834	3.18777e-06	0.000138
AT3G48520	ctrl	TRUE	542.336	2.38154	0.878175	2.71192	0.00668938	0.0475756
AT3G12500	ctrl	TRUE	275.262	2.36709	0.477508	4.95716	7.15293e-07	4.09745e-05
AT4G33905	ctrl	TRUE	46.2292	2.36674	0.49985	4.7349	2.19162e-06	0.000102232
AT3G28007	ctrl	TRUE	136.307	2.34418	0.724652	3.23491	0.0012168	0.0140865
AT1G47510	ctrl	TRUE	33.6313	2.32781	0.450853	5.16314	2.42848e-07	1.66361e-05
AT1G52040	ctrl	TRUE	156.083	-2.30631	0.371803	-6.20306	5.53766e-10	9.56535e-08
AT2G47770	ctrl	TRUE	148.329	2.30538	0.535846	4.30233	1.69013e-05	0.000521109
AT3G08870	ctrl	TRUE	57.9177	2.30152	0.504967	4.55777	5.17e-06	0.000205457
AT1G66830	ctrl	TRUE	31.4626	2.26745	0.528449	4.29076	1.78066e-05	0.000540602
AT2G47780	ctrl	TRUE	49.9287	2.26494	0.475699	4.76129	1.92359e-06	9.2195e-05
AT5G35940	ctrl	TRUE	64.0347	-2.25532	0.336112	-6.71003	1.94581e-11	5.14343e-09
AT5G48000	ctrl	TRUE	464.842	-2.23238	0.205637	-10.8559	1.86899e-27	4.0758e-24
AT1G52890	ctrl	TRUE	34.6063	2.23083	0.543902	4.10153	4.10419e-05	0.00104448
AT1G77210	ctrl	TRUE	29.5545	-2.22162	0.337526	-6.58209	4.63874e-11	1.051e-08
AT1G53470	ctrl	TRUE	792.543	2.21756	0.48668	4.55651	5.20117e-06	0.000206226
AT3G15990	ctrl	TRUE	251.728	2.20768	0.721162	3.06128	0.00220392	0.0216496
AT1G13650	ctrl	TRUE	145.217	-2.2044	0.797479	-2.76421	0.00570615	0.0423796
AT3G08040	ctrl	TRUE	150.925	2.17537	0.328513	6.62189	3.54644e-11	8.71426e-09
AT5G40790	ctrl	TRUE	30.9074	2.17365	0.413241	5.26001	1.44044e-07	1.10219e-05
AT2G34610	ctrl	TRUE	50.0541	2.17071	0.495192	4.38357	1.16752e-05	0.000393974
AT5G06760	ctrl	TRUE	261.535	2.14804	0.403139	5.32829	9.91408e-08	8.33266e-06
AT4G27410	ctrl	TRUE	476.671	2.14132	0.372483	5.74876	8.98978e-09	1.12831e-06
AT1G68570	ctrl	TRUE	1643.9	2.1396	0.477571	4.48018	7.45796e-06	0.00027277
AT5G52320	ctrl	TRUE	103.716	2.13433	0.513733	4.15456	3.25914e-05	0.000882902
AT3G63060	ctrl	TRUE	61.9902	2.10368	0.467796	4.497	6.89197e-06	0.00025637
AT1G29090	ctrl	TRUE	44.6155	-2.06766	0.322948	-6.40246	1.52896e-10	3.10166e-08
AT2G39350	ctrl	TRUE	556.638	2.06567	0.487748	4.23511	2.2844e-05	0.000665335
AT5G54300	ctrl	TRUE	208.291	2.06219	0.531534	3.8797	0.000104586	0.00219568
AT4G11650	ctrl	TRUE	169.181	2.05891	0.379507	5.42524	5.78765e-08	5.28645e-06
AT5G15180	ctrl	TRUE	84.8632	2.05713	0.512957	4.01034	6.06303e-05	0.00141411
AT3G61890	ctrl	TRUE	201.364	2.03922	0.38314	5.32239	1.0241e-07	8.4276e-06
AT3G06355	ctrl	TRUE	563.347	-2.03134	0.184957	-10.9828	4.62488e-28	1.34476e-24
AT2G45180	ctrl	TRUE	3900.27	-2.02687	0.374623	-5.41043	6.28751e-08	5.68352e-06
AT3G09160	ctrl	TRUE	29.2726	-2.02271	0.449918	-4.49573	6.9332e-06	0.000257355
AT5G67480	ctrl	TRUE	337.269	2.01598	0.511201	3.94361	8.02648e-05	0.00176583
AT2G34070	ctrl	TRUE	575.131	2.01069	0.47732	4.21247	2.52598e-05	0.000723616
AT5G17860	ctrl	TRUE	422.381	2.00885	0.733971	2.73696	0.006201	0.0450011
AT4G21326	ctrl	TRUE	40.4729	-2.00673	0.321029	-6.25093	4.0801e-10	7.3383e-08
AT1G67865	ctrl	TRUE	32.4816	-1.97995	0.563096	-3.51618	0.0004378	0.00666131
AT5G05390	ctrl	TRUE	100.832	1.97084	0.572421	3.443	0.000575303	0.00817324
AT4G16857	ctrl	TRUE	35.4082	-1.95115	0.292244	-6.67643	2.44835e-11	6.28147e-09
AT2G46680	ctrl	TRUE	421.647	1.94453	0.278036	6.99379	2.67567e-12	9.33595e-10
AT5G36910	ctrl	TRUE	371.199	-1.93919	0.188855	-10.2681	9.80673e-25	1.71088e-21
AT1G54100	ctrl	TRUE	2011.88	1.93829	0.372189	5.20782	1.91076e-07	1.40042e-05
AT5G50360	ctrl	TRUE	45.4237	1.93674	0.470735	4.11428	3.88391e-05	0.00100087
AT3G57010	ctrl	TRUE	2136.25	1.93493	0.522251	3.70498	0.000211406	0.00387203
AT1G66760	ctrl	TRUE	727.207	1.92887	0.488357	3.9497	7.82481e-05	0.00173679
AT1G56600	ctrl	TRUE	52.5991	1.91945	0.408657	4.69697	2.64055e-06	0.000119655
AT2G26860	ctrl	TRUE	40.5628	-1.91075	0.289844	-6.59236	4.32889e-11	9.93708e-09
AT5G48850	ctrl	TRUE	68.5315	1.90228	0.448417	4.24222	2.21318e-05	0.000651116
AT3G59340	ctrl	TRUE	35.9311	-1.89782	0.308751	-6.14678	7.90717e-10	1.31263e-07
AT3G13672	ctrl	TRUE	26.6056	1.89759	0.449626	4.22037	2.43897e-05	0.00070331
AT1G61890	ctrl	TRUE	1659.02	1.89567	0.524809	3.61212	0.000303707	0.0050849
AT2G41190	ctrl	TRUE	723.825	1.88745	0.430056	4.38886	1.13948e-05	0.000386758
AT3G27660	ctrl	TRUE	41.905	1.88677	0.434289	4.34451	1.39588e-05	0.000446017
AT5G47980	ctrl	TRUE	128.243	-1.8865	0.357412	-5.27823	1.30439e-07	1.02046e-05
AT3G43270	ctrl	TRUE	650.851	1.88278	0.462342	4.07228	4.65557e-05	0.00115044
AT4G27440	ctrl	TRUE	1214.74	-1.87635	0.320341	-5.85735	4.70299e-09	6.51177e-07
AT1G02800	ctrl	TRUE	49.6646	-1.87348	0.283793	-6.60156	4.06843e-11	9.47725e-09
AT3G44860	ctrl	TRUE	59.9372	1.87231	0.497872	3.76063	0.000169487	0.00324218
AT5G56050	ctrl	TRUE	28.175	1.86696	0.330842	5.64305	1.67065e-08	1.8804e-06
AT2G36780	ctrl	TRUE	40.5707	1.86664	0.543597	3.43387	0.000595033	0.00838526
AT2G10940	ctrl	TRUE	9170.8	-1.85434	0.285143	-6.50322	7.86187e-11	1.67266e-08
AT1G04220	ctrl	TRUE	309.437	1.84642	0.516964	3.57166	0.000354721	0.00570891
AT1G29195	ctrl	TRUE	28.1178	1.84091	0.419448	4.38889	1.1393e-05	0.000386758
AT1G15460	ctrl	TRUE	52.0246	1.83141	0.421457	4.34543	1.39002e-05	0.000444959
AT1G51760	ctrl	TRUE	1085.34	1.81834	0.420584	4.32337	1.53663e-05	0.000483899
AT4G15150	ctrl	TRUE	40.1346	1.81758	0.61499	2.95546	0.00312201	0.0277042
AT5G25190	ctrl	TRUE	41.0098	-1.81463	0.313805	-5.78268	7.35179e-09	9.50069e-07
AT2G16005	ctrl	TRUE	134.521	-1.80896	0.273573	-6.61233	3.78317e-11	9.04127e-09
AT1G22570	ctrl	TRUE	104.304	-1.8061	0.222606	-8.11343	4.92091e-16	2.96035e-13
AT5G47550	ctrl	TRUE	189.584	1.80505	0.27134	6.65236	2.88427e-11	7.18844e-09
AT1G05680	ctrl	TRUE	195.132	1.78718	0.441871	4.04458	5.2418e-05	0.00126835
AT1G73390	ctrl	TRUE	697.966	1.78114	0.351801	5.06291	4.12912e-07	2.61952e-05
AT3G48310	ctrl	TRUE	314.069	1.77401	0.376456	4.71239	2.44826e-06	0.000112996
AT2G33830	ctrl	TRUE	53.8173	-1.76448	0.358982	-4.91523	8.86767e-07	4.85831e-05
AT3G23920	ctrl	TRUE	2404.73	1.76439	0.301951	5.84332	5.1172e-09	6.97459e-07
AT4G09820	ctrl	TRUE	61.3309	1.76216	0.320044	5.50599	3.67093e-08	3.57783e-06
AT1G08290	ctrl	TRUE	30.8077	1.75868	0.317662	5.53633	3.08875e-08	3.20752e-06
AT1G56430	ctrl	TRUE	96.9829	-1.7567	0.182409	-9.63059	5.93857e-22	6.90695e-19
AT1G30730	ctrl	TRUE	125.188	1.75499	0.519249	3.37987	0.000725209	0.00970246
AT2G45900	ctrl	TRUE	94.5662	1.75425	0.27782	6.31436	2.71288e-10	5.20097e-08
AT1G09500	ctrl	TRUE	54.0734	1.74518	0.571604	3.05313	0.00226467	0.0221217
AT1G10585	ctrl	TRUE	44.4584	1.74256	0.48275	3.60964	0.000306618	0.00510908
AT2G31083	ctrl	TRUE	49.5011	1.74127	0.249322	6.98402	2.86858e-12	9.68407e-10
AT3G51895	ctrl	TRUE	311.171	1.72696	0.402087	4.29499	1.74705e-05	0.000535398
AT4G33070	ctrl	TRUE	170.202	1.72586	0.422978	4.08025	4.49865e-05	0.00112079
AT5G26220	ctrl	TRUE	84.9891	1.71678	0.358841	4.78424	1.71633e-06	8.38741e-05
AT3G05400	ctrl	TRUE	227.158	1.70939	0.482327	3.54404	0.000394049	0.00621571
AT3G21890	ctrl	TRUE	55.528	1.70783	0.238781	7.15229	8.5341e-13	3.30858e-10
AT3G48510	ctrl	TRUE	37.0736	1.69525	0.420409	4.03238	5.52143e-05	0.00131948
AT3G01990	ctrl	TRUE	29.9429	1.68898	0.345791	4.88438	1.03754e-06	5.42137e-05
AT3G50400	ctrl	TRUE	132.645	1.68862	0.373053	4.52648	5.99742e-06	0.000231363
AT4G01985	ctrl	TRUE	45.0062	1.68787	0.613999	2.74897	0.0059782	0.0438402
AT1G72416	ctrl	TRUE	75.8558	-1.67746	0.481881	-3.48107	0.000499414	0.00736391
AT2G34810	ctrl	TRUE	1723.97	1.67613	0.524139	3.19788	0.00138441	0.0154923
AT3G06520	ctrl	TRUE	36.6717	1.67375	0.450821	3.71268	0.000205074	0.00376999
AT3G05640	ctrl	TRUE	477.522	1.67265	0.346349	4.82937	1.36966e-06	6.86642e-05
AT2G45560	ctrl	TRUE	270.95	-1.67019	0.252429	-6.61646	3.67894e-11	8.91426e-09
AT4G10960	ctrl	TRUE	111.233	1.667	0.42813	3.89368	9.87331e-05	0.00208535
AT1G26450	ctrl	TRUE	196.384	1.66693	0.410382	4.06189	4.86768e-05	0.00119272
AT4G17810	ctrl	TRUE	84.5077	-1.66615	0.441975	-3.76979	0.000163383	0.00314958
AT5G15290	ctrl	TRUE	49.3645	1.66567	0.391708	4.25234	2.1155e-05	0.000628939
AT2G23000	ctrl	TRUE	701.454	1.66362	0.271039	6.13794	8.35989e-10	1.36305e-07
AT4G24250	ctrl	TRUE	47.9056	1.66333	0.409302	4.06381	4.82788e-05	0.00118732
AT3G14620	ctrl	TRUE	138.124	1.65976	0.482148	3.44242	0.000576535	0.00818407
AT2G18150	ctrl	TRUE	60.0752	1.65919	0.513419	3.23165	0.00123076	0.0141749
AT2G28720	ctrl	TRUE	40.26	-1.65445	0.359941	-4.59644	4.29774e-06	0.000177254
AT4G25990	ctrl	TRUE	117.559	-1.65086	0.293888	-5.6173	1.93962e-08	2.15533e-06
AT1G73850	ctrl	TRUE	76.3025	1.65006	0.313409	5.26487	1.4029e-07	1.07819e-05
AT5G24800	ctrl	TRUE	170.663	1.6489	0.196886	8.37486	5.52888e-17	3.70988e-14
AT3G50350	ctrl	TRUE	73.6193	-1.64719	0.454017	-3.62804	0.000285576	0.00484646
AT3G22800	ctrl	TRUE	95.406	-1.64564	0.253637	-6.48817	8.68837e-11	1.82623e-08
AT1G24070	ctrl	TRUE	572.464	1.64354	0.290461	5.6584	1.52794e-08	1.75372e-06
AT2G44480	ctrl	TRUE	32.4692	1.64347	0.374974	4.3829	1.17112e-05	0.000394428
AT2G15220	ctrl	TRUE	31.4342	1.64331	0.338535	4.85417	1.20894e-06	6.21211e-05
AT4G30470	ctrl	TRUE	617.905	1.63989	0.378386	4.3339	1.4649e-05	0.000464667
AT4G33150	ctrl	TRUE	636.95	1.63765	0.359269	4.5583	5.15703e-06	0.00020541
AT3G06345	ctrl	TRUE	1677.96	-1.63724	0.295624	-5.53826	3.05492e-08	3.19138e-06
AT3G50740	ctrl	TRUE	250.331	-1.63685	0.243452	-6.72349	1.77421e-11	4.83639e-09
AT5G52300	ctrl	TRUE	213.363	1.63537	0.341927	4.78281	1.7286e-06	8.42381e-05
AT5G01870	ctrl	TRUE	169.033	1.62754	0.263849	6.16845	6.89641e-10	1.1681e-07
AT1G48100	ctrl	TRUE	381.9	1.62669	0.4344	3.74468	0.000180623	0.00339929
AT5G45380	ctrl	TRUE	115.627	-1.62638	0.27921	-5.82494	5.71317e-09	7.62223e-07
AT1G68740	ctrl	TRUE	336.588	1.62283	0.462528	3.50861	0.000450456	0.00680992
AT2G38310	ctrl	TRUE	776.223	-1.62247	0.481589	-3.36898	0.000754458	0.00996309
AT5G53250	ctrl	TRUE	122.422	-1.61878	0.389165	-4.15963	3.18768e-05	0.00086687
AT4G01130	ctrl	TRUE	33.7326	-1.61618	0.29332	-5.50997	3.58903e-08	3.55762e-06
AT4G21440	ctrl	TRUE	26.6689	1.61519	0.546329	2.95644	0.00311212	0.0276305
AT1G73480	ctrl	TRUE	1350.26	1.61489	0.477642	3.38097	0.000722317	0.00969297
AT1G43910	ctrl	TRUE	80.1654	1.60922	0.437331	3.67963	0.000233573	0.00414961
AT4G37990	ctrl	TRUE	63.9727	1.60293	0.397683	4.03068	5.5616e-05	0.00132551
AT3G62590	ctrl	TRUE	136.924	1.6004	0.372589	4.29535	1.74417e-05	0.000535398
AT4G22610	ctrl	TRUE	58.8338	-1.59332	0.280006	-5.6903	1.26816e-08	1.49489e-06
AT1G23200	ctrl	TRUE	156.232	1.59098	0.517072	3.0769	0.00209168	0.020912
AT4G31355	ctrl	TRUE	65.7538	1.58808	0.520719	3.04978	0.00229011	0.0222727
AT4G31405	ctrl	TRUE	44.58	1.5877	0.561718	2.82651	0.00470584	0.0371101
AT1G14250	ctrl	TRUE	276.143	-1.58716	0.295151	-5.37746	7.55434e-08	6.58965e-06
AT4G22212	ctrl	TRUE	201.937	-1.58676	0.260473	-6.09182	1.11636e-09	1.75459e-07
AT1G51840	ctrl	TRUE	139.227	-1.5857	0.157941	-10.0398	1.01833e-23	1.48048e-20
AT4G06375	ctrl	TRUE	175.903	-1.58486	0.403894	-3.92396	8.71066e-05	0.00189248
AT1G17420	ctrl	TRUE	525.558	1.58372	0.383067	4.13431	3.56027e-05	0.000946836
AT1G72770	ctrl	TRUE	1200.61	1.58299	0.264863	5.97665	2.27769e-09	3.33921e-07
AT5G44130	ctrl	TRUE	472.915	-1.58128	0.276402	-5.72094	1.05935e-08	1.31074e-06
AT1G16390	ctrl	TRUE	123.98	-1.58013	0.368873	-4.28366	1.83841e-05	0.000554893
AT3G14440	ctrl	TRUE	560.027	1.5799	0.39827	3.9669	7.28136e-05	0.00163278
AT1G51830	ctrl	TRUE	284.841	-1.57869	0.196394	-8.03839	9.10292e-16	5.29365e-13
AT5G64700	ctrl	TRUE	60.1781	1.57205	0.490372	3.20583	0.00134673	0.0151679
AT3G14280	ctrl	TRUE	40.7787	1.57164	0.336802	4.66635	3.06602e-06	0.000133724
AT5G44580	ctrl	TRUE	328.529	-1.56977	0.233382	-6.72619	1.74163e-11	4.83089e-09
AT1G77530	ctrl	TRUE	106.84	-1.56419	0.554985	-2.81844	0.00482583	0.0377879
AT1G16850	ctrl	TRUE	247.511	1.56192	0.473468	3.2989	0.000970642	0.0119336
AT4G40010	ctrl	TRUE	104.002	1.55718	0.367991	4.23157	2.3207e-05	0.000673658
AT5G20630	ctrl	TRUE	685.748	-1.55667	0.251283	-6.19491	5.832e-10	9.97501e-08
AT3G14740	ctrl	TRUE	55.8965	-1.55162	0.32499	-4.77435	1.80286e-06	8.71264e-05
AT5G38930	ctrl	TRUE	35.2283	-1.551	0.294279	-5.27052	1.36039e-07	1.05015e-05
AT1G13420	ctrl	TRUE	68.0122	-1.55006	0.369666	-4.19314	2.75122e-05	0.000774156
AT1G69490	ctrl	TRUE	23.7682	1.54637	0.409899	3.77257	0.000161573	0.00312853
AT1G56300	ctrl	TRUE	41.7592	-1.54453	0.28882	-5.34775	8.90556e-08	7.69141e-06
AT1G60750	ctrl	TRUE	54.654	1.54349	0.302756	5.09814	3.43014e-07	2.22243e-05
AT1G06100	ctrl	TRUE	31.4713	-1.54247	0.342962	-4.49751	6.87546e-06	0.000256302
AT3G05655	ctrl	TRUE	73.1324	-1.54203	0.37896	-4.06911	4.71933e-05	0.00116455
AT5G38020	ctrl	TRUE	338.164	-1.53529	0.219857	-6.98314	2.88646e-12	9.68407e-10
AT3G04000	ctrl	TRUE	37.7064	1.53454	0.40672	3.77296	0.000161325	0.0031272
AT1G21270	ctrl	TRUE	62.305	-1.53424	0.311091	-4.93182	8.14682e-07	4.54087e-05
AT2G32530	ctrl	TRUE	837.671	1.52996	0.269166	5.68407	1.31523e-08	1.53996e-06
AT3G05936	ctrl	TRUE	28.2972	1.52935	0.343083	4.45767	8.28542e-06	0.0002932
AT5G52900	ctrl	TRUE	138.642	-1.52928	0.368725	-4.14749	3.36136e-05	0.000904972
AT4G10310	ctrl	TRUE	51.5135	1.52753	0.373628	4.08837	4.34424e-05	0.00109207
AT2G04350	ctrl	TRUE	1512.97	1.52705	0.402913	3.79004	0.000150625	0.00297264
AT1G27020	ctrl	TRUE	58.1769	-1.52438	0.306448	-4.97437	6.54591e-07	3.88435e-05
AT1G26730	ctrl	TRUE	81.64	1.52252	0.385705	3.94737	7.90143e-05	0.00174794
AT5G23840	ctrl	TRUE	36.5506	-1.52094	0.276174	-5.50719	3.64599e-08	3.57348e-06
AT1G17940	ctrl	TRUE	211.506	1.51902	0.39325	3.86272	0.000112129	0.00232882
AT2G36750	ctrl	TRUE	74.9318	1.51547	0.338775	4.47337	7.69957e-06	0.000278668
AT5G03210	ctrl	TRUE	47.1165	1.51306	0.335812	4.50566	6.61667e-06	0.000248246
AT3G51350	ctrl	TRUE	28.3914	-1.51169	0.275538	-5.48632	4.104e-08	3.93398e-06
AT2G28900	ctrl	TRUE	182.883	-1.50944	0.308958	-4.88557	1.03131e-06	5.42137e-05
AT2G19900	ctrl	TRUE	70.9477	1.50603	0.472323	3.18857	0.0014298	0.0157833
AT3G59330	ctrl	TRUE	30.2816	-1.50365	0.287097	-5.23743	1.62827e-07	1.22954e-05
AT2G28400	ctrl	TRUE	128.443	1.50233	0.384284	3.90942	9.25167e-05	0.00197793
AT4G25850	ctrl	TRUE	20.3636	1.50061	0.434084	3.45695	0.000546322	0.00789001
AT3G14067	ctrl	TRUE	7952.35	1.49674	0.428533	3.49271	0.00047814	0.00714181
AT1G50960	ctrl	TRUE	28.6023	1.48976	0.443633	3.35808	0.000784851	0.0102259
AT4G25020	ctrl	TRUE	22.1403	1.4873	0.316381	4.70097	2.5893e-06	0.000117945
AT1G52690	ctrl	TRUE	109.667	1.4836	0.344997	4.30034	1.70535e-05	0.000524718
AT1G21400	ctrl	TRUE	305.539	1.48109	0.327232	4.52612	6.00753e-06	0.000231363
AT5G39050	ctrl	TRUE	776.508	1.48046	0.379692	3.89909	9.6553e-05	0.00204519
AT2G21560	ctrl	TRUE	99.4407	1.47924	0.359879	4.11037	3.95027e-05	0.00101497
AT5G62280	ctrl	TRUE	104.597	-1.47709	0.548051	-2.69517	0.00703537	0.0492285
AT1G35140	ctrl	TRUE	67.9815	-1.47532	0.287155	-5.13772	2.78093e-07	1.85176e-05
AT4G11350	ctrl	TRUE	84.6988	1.47416	0.415193	3.55056	0.000384418	0.00608581
AT3G20300	ctrl	TRUE	337.255	1.47338	0.413918	3.5596	0.000371424	0.00591228
AT1G08230	ctrl	TRUE	315.145	1.47331	0.281345	5.23666	1.63506e-07	1.22954e-05
AT5G03350	ctrl	TRUE	40.5987	-1.47043	0.31689	-4.64019	3.48081e-06	0.000148113
AT1G72680	ctrl	TRUE	181.114	1.46933	0.306646	4.79162	1.65439e-06	8.13028e-05
AT5G14180	ctrl	TRUE	32.999	1.46918	0.399816	3.67463	0.000238196	0.00419754
AT3G41762	ctrl	TRUE	730.802	-1.46847	0.259724	-5.65396	1.56792e-08	1.78784e-06
AT5G24155	ctrl	TRUE	544.701	1.46551	0.133077	11.0125	3.32702e-28	1.16086e-24
AT3G01970	ctrl	TRUE	49.0198	1.46536	0.408008	3.59149	0.000328797	0.00539116
AT1G33110	ctrl	TRUE	990.432	1.46517	0.335037	4.37316	1.2246e-05	0.000406167
AT5G48010	ctrl	TRUE	1004.04	-1.46515	0.164566	-8.90315	5.42814e-19	4.50949e-16
AT1G03870	ctrl	TRUE	628.619	-1.46511	0.272407	-5.37839	7.51542e-08	6.58864e-06
AT4G23450	ctrl	TRUE	26.5002	1.46091	0.46562	3.13755	0.00170363	0.0179262
AT2G30140	ctrl	TRUE	538.49	1.45932	0.354333	4.1185	3.81353e-05	0.000994012
AT5G14940	ctrl	TRUE	78.4993	1.45868	0.288981	5.04765	4.47273e-07	2.78683e-05
AT2G36590	ctrl	TRUE	262.252	1.45397	0.361594	4.02101	5.79499e-05	0.00136806
AT2G40610	ctrl	TRUE	194.167	-1.45308	0.202724	-7.16779	7.62204e-13	3.02214e-10
AT1G26945	ctrl	TRUE	60.5093	-1.44289	0.446557	-3.23114	0.00123297	0.0141796
AT3G06420	ctrl	TRUE	40.3764	1.4403	0.264592	5.44347	5.22528e-08	4.92758e-06
AT4G28040	ctrl	TRUE	256.016	1.43965	0.515984	2.7901	0.00526917	0.040195
AT1G21130	ctrl	TRUE	332.966	-1.43609	0.186958	-7.68135	1.57415e-14	7.82959e-12
AT5G18130	ctrl	TRUE	133.532	1.43546	0.220035	6.5238	6.85489e-11	1.49488e-08
AT2G38390	ctrl	TRUE	496.86	1.43477	0.317516	4.51873	6.22129e-06	0.000237221
AT1G14430	ctrl	TRUE	59.3911	-1.43428	0.292701	-4.90016	9.57588e-07	5.09332e-05
AT3G04070	ctrl	TRUE	98.8591	1.43212	0.35277	4.05964	4.91486e-05	0.00119923
AT1G64170	ctrl	TRUE	142.371	-1.42944	0.280451	-5.09692	3.45224e-07	2.22243e-05
AT5G24150	ctrl	TRUE	1164.18	1.42602	0.295228	4.83025	1.36365e-06	6.85598e-05
AT1G23020	ctrl	TRUE	430.555	-1.42535	0.258023	-5.52411	3.31167e-08	3.35903e-06
AT5G07990	ctrl	TRUE	333.055	1.42373	0.339429	4.19449	2.73484e-05	0.000772024
AT2G34060	ctrl	TRUE	64.2247	-1.42278	0.243077	-5.85318	4.82253e-09	6.62471e-07
AT5G02540	ctrl	TRUE	36.4264	-1.42189	0.363849	-3.90791	9.3098e-05	0.00198556
AT5G05440	ctrl	TRUE	206.16	-1.41939	0.266406	-5.32792	9.93462e-08	8.33266e-06
AT5G14780	ctrl	TRUE	606.683	1.41641	0.367924	3.84974	0.000118242	0.00244414
AT1G70850	ctrl	TRUE	1385.13	-1.41025	0.3241	-4.35129	1.35341e-05	0.000435639
AT5G13330	ctrl	TRUE	128.666	1.41012	0.333372	4.22988	2.33814e-05	0.000677595
AT2G26690	ctrl	TRUE	2262.71	1.41011	0.387618	3.63788	0.000274896	0.00470642
AT1G49245	ctrl	TRUE	59.8448	-1.40557	0.415038	-3.38661	0.00070761	0.00956233
AT4G29030	ctrl	TRUE	528.003	-1.40444	0.171839	-8.17301	3.00784e-16	1.8741e-13
AT5G43180	ctrl	TRUE	76.7134	1.40337	0.30601	4.58602	4.51779e-06	0.000185017
AT5G08330	ctrl	TRUE	203.57	-1.4025	0.336266	-4.17079	3.03546e-05	0.000835279
AT2G32510	ctrl	TRUE	183.12	1.40169	0.292212	4.79682	1.61201e-06	7.96689e-05
AT2G41990	ctrl	TRUE	28.7458	-1.40102	0.271728	-5.15595	2.52344e-07	1.71299e-05
AT1G20450	ctrl	TRUE	1841.82	1.40067	0.334779	4.18387	2.86586e-05	0.000801245
AT4G31860	ctrl	TRUE	450.465	1.40034	0.232991	6.01028	1.85199e-09	2.83419e-07
AT5G01520	ctrl	TRUE	209.068	1.39623	0.259448	5.38152	7.38575e-08	6.50766e-06
AT1G58360	ctrl	TRUE	1967.13	1.39559	0.392587	3.55485	0.000378188	0.00599807
AT5G53120	ctrl	TRUE	622.58	1.39465	0.189235	7.36993	1.70714e-13	7.63659e-11
AT1G23060	ctrl	TRUE	18.717	1.39255	0.421003	3.30769	0.000940685	0.011664
AT5G37540	ctrl	TRUE	222.33	1.3907	0.439151	3.1668	0.00154129	0.0166704
AT5G23660	ctrl	TRUE	330.244	1.38982	0.345106	4.02723	5.64372e-05	0.0013396
AT5G26622	ctrl	TRUE	104.168	-1.38838	0.193316	-7.18194	6.87305e-13	2.78854e-10
AT5G14890	ctrl	TRUE	41.2364	1.38772	0.305365	4.54448	5.50723e-06	0.000216395
AT2G29460	ctrl	TRUE	49.8047	1.38748	0.317836	4.36539	1.26897e-05	0.000417059
AT5G64230	ctrl	TRUE	150.741	1.38492	0.503092	2.75281	0.00590853	0.0434754
AT2G34500	ctrl	TRUE	253.615	1.38471	0.487713	2.83919	0.00452288	0.0361458
AT4G21870	ctrl	TRUE	61.1249	-1.38468	0.389212	-3.55766	0.000374178	0.00594528
AT3G48340	ctrl	TRUE	410.147	1.38396	0.243852	5.67541	1.38358e-08	1.6092e-06
AT2G40900	ctrl	TRUE	430.152	1.3838	0.386303	3.58217	0.000340753	0.00552489
AT3G03341	ctrl	TRUE	34.2079	1.38304	0.404136	3.42221	0.000621147	0.00862782
AT4G16790	ctrl	TRUE	160.186	1.3826	0.304666	4.53808	5.6769e-06	0.00022256
AT4G00975	ctrl	TRUE	27.2456	-1.38236	0.418354	-3.30427	0.000952231	0.0117737
AT1G65845	ctrl	TRUE	86.1594	-1.38208	0.305708	-4.52092	6.15707e-06	0.000235562
AT5G06530	ctrl	TRUE	1025.41	1.38137	0.308606	4.47615	7.60017e-06	0.000276234
AT2G43820	ctrl	TRUE	592.079	1.37897	0.360727	3.82276	0.000131969	0.00265551
AT3G59850	ctrl	TRUE	62.2943	1.37808	0.436333	3.15832	0.00158684	0.0170363
AT1G53270	ctrl	TRUE	69.6119	1.37615	0.329728	4.1736	2.99827e-05	0.000827811
AT3G23510	ctrl	TRUE	72.2551	-1.37534	0.241181	-5.70251	1.18055e-08	1.4204e-06
AT5G39090	ctrl	TRUE	29.5336	1.37478	0.474062	2.90001	0.00373149	0.0315405
AT1G02220	ctrl	TRUE	37.1281	1.3745	0.4914	2.79711	0.0051562	0.0396049
AT5G61820	ctrl	TRUE	2946.93	1.37386	0.47563	2.88851	0.0038707	0.0323877
AT5G15130	ctrl	TRUE	128.481	-1.37382	0.460255	-2.98491	0.0028366	0.025842
AT2G41150	ctrl	TRUE	86.5738	1.37017	0.210308	6.51505	7.26676e-11	1.56513e-08
AT4G08300	ctrl	TRUE	120.896	1.37007	0.313673	4.36784	1.25483e-05	0.000414617
AT1G72120	ctrl	TRUE	114.909	1.369	0.429548	3.18706	0.00143728	0.0158176
AT1G63440	ctrl	TRUE	289.463	1.36851	0.3139	4.3597	1.30243e-05	0.000424068
AT1G29910	ctrl	TRUE	16292.5	-1.36773	0.327181	-4.18034	2.91067e-05	0.000809882
AT2G34430	ctrl	TRUE	8680.07	-1.36705	0.251593	-5.43356	5.52397e-08	5.09901e-06
AT1G75170	ctrl	TRUE	68.2205	1.3634	0.262634	5.19127	2.08869e-07	1.48127e-05
AT1G11190	ctrl	TRUE	86.1986	1.36268	0.312906	4.35491	1.33121e-05	0.000431678
AT1G24580	ctrl	TRUE	46.3324	1.35901	0.367817	3.6948	0.000220062	0.00399917
AT2G26030	ctrl	TRUE	63.7878	-1.35895	0.207689	-6.54319	6.0219e-11	1.32985e-08
AT2G42380	ctrl	TRUE	228.887	-1.35664	0.433656	-3.12837	0.00175779	0.0182974
AT3G14570	ctrl	TRUE	597.081	1.35337	0.241757	5.59808	2.16736e-08	2.3781e-06
AT4G20820	ctrl	TRUE	89.6496	1.35134	0.386737	3.49421	0.000475474	0.00710807
AT5G38530	ctrl	TRUE	597.324	1.34951	0.277778	4.85824	1.18435e-06	6.11309e-05
AT1G71330	ctrl	TRUE	27.2601	1.34878	0.327311	4.1208	3.77552e-05	0.000989005
AT3G59050	ctrl	TRUE	496.997	1.34739	0.153768	8.76247	1.91019e-18	1.44892e-15
AT5G42580	ctrl	TRUE	148.958	-1.34673	0.352687	-3.81848	0.000134279	0.0026865
AT1G07985	ctrl	TRUE	31.5365	1.34649	0.358773	3.75306	0.000174689	0.00330546
AT3G05620	ctrl	TRUE	43.2626	1.34502	0.475077	2.83117	0.00463783	0.0367446
AT2G37760	ctrl	TRUE	428.071	1.3439	0.24452	5.49609	3.88308e-08	3.74277e-06
AT3G49780	ctrl	TRUE	92.6793	-1.34355	0.183626	-7.31679	2.53979e-13	1.08071e-10
AT5G13580	ctrl	TRUE	519.484	1.34074	0.422926	3.17015	0.00152359	0.0165521
AT5G14330	ctrl	TRUE	92.5558	-1.34016	0.190913	-7.01971	2.22326e-12	7.91571e-10
AT1G64563	ctrl	TRUE	102.496	1.33928	0.474334	2.8235	0.00475025	0.0373301
AT1G29380	ctrl	TRUE	125.46	1.33852	0.476428	2.8095	0.00496181	0.038507
AT1G12750	ctrl	TRUE	185.248	-1.33851	0.17532	-7.63466	2.26417e-14	1.06759e-11
AT4G14690	ctrl	TRUE	203.858	1.33485	0.233734	5.71096	1.12338e-08	1.37052e-06
AT5G02055	ctrl	TRUE	16.0253	-1.33441	0.436262	-3.05873	0.00222274	0.0217853
AT2G30010	ctrl	TRUE	172.899	-1.33439	0.23873	-5.58954	2.27666e-08	2.48242e-06
AT2G47460	ctrl	TRUE	74.9094	1.33416	0.277784	4.80285	1.56425e-06	7.75281e-05
AT2G33590	ctrl	TRUE	356.753	1.33317	0.256194	5.20375	1.9531e-07	1.41974e-05
AT1G22330	ctrl	TRUE	110.105	-1.33292	0.388579	-3.43023	0.000603077	0.00845763
AT2G18100	ctrl	TRUE	74.0491	1.33211	0.268739	4.95688	7.16337e-07	4.09745e-05
AT3G05650	ctrl	TRUE	57.4325	1.33166	0.399524	3.33312	0.000858787	0.0108726
AT3G03650	ctrl	TRUE	21.4711	1.33105	0.432261	3.07927	0.00207511	0.0207821
AT3G21670	ctrl	TRUE	1722.95	1.33031	0.324566	4.09875	4.15395e-05	0.00105334
AT3G57380	ctrl	TRUE	33.3369	1.3296	0.407792	3.26049	0.0011122	0.0131816
AT5G45200	ctrl	TRUE	45.7453	1.32929	0.248944	5.3397	9.3099e-08	8.00101e-06
AT1G15002	ctrl	TRUE	209.553	-1.32847	0.286021	-4.64468	3.40612e-06	0.000146003
AT5G24070	ctrl	TRUE	27.8128	-1.3271	0.303039	-4.37931	1.19055e-05	0.000398663
AT1G23935	ctrl	TRUE	34.3665	-1.32634	0.255376	-5.19366	2.06195e-07	1.46963e-05
AT5G56240	ctrl	TRUE	1045.95	1.32541	0.134275	9.87087	5.56821e-23	7.29896e-20
AT1G69610	ctrl	TRUE	96.2408	1.32195	0.311699	4.2411	2.2243e-05	0.000652189
AT1G54540	ctrl	TRUE	37.4504	1.32173	0.417873	3.16301	0.00156149	0.0168263
AT4G19230	ctrl	TRUE	421.949	1.32077	0.485364	2.7212	0.00650463	0.0466803
AT1G06570	ctrl	TRUE	685.021	1.31968	0.276223	4.7776	1.77398e-06	8.62084e-05
AT1G67110	ctrl	TRUE	71.9788	-1.3157	0.263014	-5.00239	5.66249e-07	3.43013e-05
AT5G13370	ctrl	TRUE	371.095	1.30971	0.325371	4.02527	5.69107e-05	0.00134717
AT3G23800	ctrl	TRUE	38.6096	-1.30909	0.261458	-5.0069	5.53123e-07	3.36229e-05
AT5G49690	ctrl	TRUE	25.0883	1.30889	0.378721	3.45608	0.000548101	0.00790262
AT4G28780	ctrl	TRUE	355.024	-1.30807	0.255276	-5.12414	2.98898e-07	1.9553e-05
AT1G73330	ctrl	TRUE	1258.93	-1.30682	0.168539	-7.75382	8.91711e-15	4.71418e-12
AT2G18300	ctrl	TRUE	136.97	-1.3042	0.448376	-2.90871	0.00362918	0.0309607
AT1G76820	ctrl	TRUE	35.9348	1.29875	0.242665	5.35202	8.69787e-08	7.54941e-06
AT5G02020	ctrl	TRUE	62.0053	1.29852	0.316539	4.10225	4.09152e-05	0.00104358
AT5G64120	ctrl	TRUE	635.331	-1.29743	0.289409	-4.48304	7.35887e-06	0.00027028
AT2G44380	ctrl	TRUE	108.387	-1.29541	0.432141	-2.99766	0.00272058	0.0250863
AT1G31820	ctrl	TRUE	96.1263	1.29493	0.447622	2.89292	0.0038168	0.0320442
AT1G64940	ctrl	TRUE	93.0552	1.29485	0.403409	3.20978	0.00132838	0.0150193
AT1G29640	ctrl	TRUE	122.724	1.29475	0.257947	5.01945	5.18195e-07	3.18677e-05
AT1G27200	ctrl	TRUE	556.237	1.29309	0.389164	3.32274	0.000891377	0.0111797
AT5G61260	ctrl	TRUE	32.1382	-1.29169	0.315583	-4.09304	4.25755e-05	0.00107337
AT4G05100	ctrl	TRUE	67.2343	1.2898	0.400274	3.22229	0.00127171	0.0144914
AT4G26670	ctrl	TRUE	62.0604	-1.28731	0.299216	-4.30226	1.69063e-05	0.000521109
AT1G06490	ctrl	TRUE	279.145	1.28705	0.300109	4.2886	1.79805e-05	0.000544598
AT4G16680	ctrl	TRUE	197.182	1.28677	0.232027	5.54578	2.92642e-08	3.11307e-06
AT1G17750	ctrl	TRUE	116.05	1.28659	0.417693	3.08023	0.00206838	0.0207338
AT1G64060	ctrl	TRUE	635.27	1.28494	0.303824	4.22924	2.34477e-05	0.00067839
AT4G23050	ctrl	TRUE	621.131	1.28438	0.345626	3.7161	0.00020232	0.0037351
AT5G65730	ctrl	TRUE	340.936	-1.28432	0.379913	-3.38056	0.000723389	0.00969297
AT3G58550	ctrl	TRUE	162.667	1.28404	0.160012	8.02469	1.01782e-15	5.72801e-13
AT5G67340	ctrl	TRUE	74.2332	1.28395	0.370161	3.46863	0.000523128	0.00763084
AT1G63010	ctrl	TRUE	1323.85	1.28268	0.381477	3.36241	0.000772649	0.0101047
AT4G09500	ctrl	TRUE	183.418	1.28051	0.392902	3.25911	0.00111761	0.0132278
AT4G24960	ctrl	TRUE	720.97	1.28025	0.383189	3.34105	0.000834614	0.0106516
AT4G13560	ctrl	TRUE	39.9257	1.27873	0.320847	3.98548	6.73445e-05	0.00152593
AT3G07730	ctrl	TRUE	31.2824	1.27842	0.375248	3.40686	0.000657153	0.00903771
AT5G18600	ctrl	TRUE	61.1707	-1.27812	0.340355	-3.75524	0.000173173	0.00328388
AT5G66460	ctrl	TRUE	250.473	1.27775	0.415498	3.07522	0.0021035	0.0209821
AT1G21410	ctrl	TRUE	151.074	1.27679	0.261595	4.8808	1.05657e-06	5.50235e-05
AT3G13080	ctrl	TRUE	2214.28	1.27615	0.389748	3.2743	0.00105923	0.0127471
AT2G37750	ctrl	TRUE	43.7308	-1.2753	0.242643	-5.25586	1.47338e-07	1.11759e-05
AT2G01310	ctrl	TRUE	96.8547	-1.27523	0.35117	-3.63138	0.000281915	0.00479833
AT4G25280	ctrl	TRUE	158.329	1.27489	0.173363	7.35386	1.92566e-13	8.39879e-11
AT5G62340	ctrl	TRUE	99.6528	-1.27345	0.307769	-4.13768	3.50836e-05	0.000934455
AT1G79270	ctrl	TRUE	714.103	1.27124	0.253273	5.01924	5.18768e-07	3.18677e-05
AT5G51500	ctrl	TRUE	99.2272	1.27081	0.405408	3.13463	0.00172068	0.0180123
AT5G01600	ctrl	TRUE	1194.63	1.26808	0.220074	5.76208	8.30843e-09	1.05802e-06
AT4G16590	ctrl	TRUE	438.169	1.26752	0.316253	4.00794	6.12518e-05	0.00142101
AT5G62480	ctrl	TRUE	54.3264	1.26747	0.353619	3.58429	0.000338002	0.00549912
AT4G01460	ctrl	TRUE	30.2668	-1.26711	0.339725	-3.7298	0.000191634	0.00355665
AT4G21850	ctrl	TRUE	246.633	-1.2656	0.41744	-3.03182	0.00243085	0.0231488
AT3G44550	ctrl	TRUE	142.575	1.2656	0.203612	6.21574	5.10848e-10	8.91225e-08
AT5G17980	ctrl	TRUE	226.807	1.26395	0.245857	5.141	2.73277e-07	1.83369e-05
AT3G57540	ctrl	TRUE	98.8588	1.26335	0.386876	3.26553	0.00109259	0.0129934
AT5G43745	ctrl	TRUE	788.046	1.26293	0.299715	4.21378	2.51136e-05	0.000721039
AT4G37560	ctrl	TRUE	47.1521	1.26192	0.23314	5.41269	6.20859e-08	5.64141e-06
AT1G34580	ctrl	TRUE	25.4511	-1.26176	0.287812	-4.38398	1.1653e-05	0.000393974
AT2G32870	ctrl	TRUE	49.3092	-1.26153	0.257997	-4.8897	1.00991e-06	5.33906e-05
AT4G18375	ctrl	TRUE	18.6313	-1.26151	0.405696	-3.10949	0.00187413	0.0192591
AT3G16340	ctrl	TRUE	1033.24	1.26084	0.334875	3.76512	0.00016647	0.00319849
AT3G04010	ctrl	TRUE	232.05	1.2602	0.425445	2.96208	0.00305568	0.0272264
AT4G14548	ctrl	TRUE	40.7058	1.25951	0.248891	5.06051	4.18131e-07	2.64301e-05
AT2G02850	ctrl	TRUE	32.5859	1.25346	0.26799	4.67728	2.90708e-06	0.00012938
AT2G15292	ctrl	TRUE	220.806	-1.25241	0.215019	-5.82464	5.72344e-09	7.62223e-07
AT1G76800	ctrl	TRUE	43.5215	1.25238	0.269714	4.64336	3.4279e-06	0.000146576
AT3G26290	ctrl	TRUE	660.417	1.25066	0.440114	2.84168	0.00448764	0.0359795
AT1G51440	ctrl	TRUE	34.2838	1.25046	0.256016	4.88431	1.03791e-06	5.42137e-05
AT4G05020	ctrl	TRUE	741.61	1.24854	0.293833	4.24915	2.14585e-05	0.000636674
AT1G31690	ctrl	TRUE	33.2592	-1.24796	0.411119	-3.03552	0.00240119	0.0229415
AT2G13550	ctrl	TRUE	33.3812	-1.24635	0.278135	-4.48109	7.42618e-06	0.000272179
AT3G29575	ctrl	TRUE	359.176	1.24535	0.255889	4.86674	1.13452e-06	5.87326e-05
AT5G25370	ctrl	TRUE	60.2313	1.24529	0.324711	3.83508	0.000125524	0.00256428
AT5G33370	ctrl	TRUE	72.2182	-1.24483	0.278301	-4.47294	7.71503e-06	0.000278668
AT5G04120	ctrl	TRUE	40.8846	-1.24462	0.376005	-3.31011	0.000932585	0.0115979
AT5G10930	ctrl	TRUE	233.507	1.24441	0.152051	8.18418	2.74155e-16	1.77145e-13
AT3G19580	ctrl	TRUE	81.5598	1.24353	0.340479	3.6523	0.000259902	0.00450721
AT5G23050	ctrl	TRUE	377.27	1.24344	0.184522	6.73872	1.59789e-11	4.56997e-09
AT2G25625	ctrl	TRUE	172.214	1.2421	0.264441	4.69708	2.6391e-06	0.000119655
AT1G01520	ctrl	TRUE	29.8881	1.24161	0.323922	3.83306	0.000126561	0.00257941
AT4G35560	ctrl	TRUE	171.53	1.24114	0.300602	4.12884	3.64596e-05	0.000963749
AT1G61340	ctrl	TRUE	73.8891	1.24114	0.251633	4.93233	8.12556e-07	4.54087e-05
AT5G57560	ctrl	TRUE	118.464	-1.24108	0.225699	-5.49883	3.82323e-08	3.70556e-06
AT5G56910	ctrl	TRUE	39.5061	-1.24072	0.302595	-4.10027	4.12667e-05	0.00104795
AT3G22100	ctrl	TRUE	29.9839	-1.24046	0.29538	-4.19954	2.67455e-05	0.000759938
AT4G33540	ctrl	TRUE	330.669	1.23954	0.331654	3.73744	0.000185907	0.00347741
AT1G71960	ctrl	TRUE	414.526	1.2379	0.389143	3.1811	0.00146716	0.0160779
AT5G50720	ctrl	TRUE	54.6764	1.23776	0.402434	3.07568	0.00210025	0.0209616
AT5G38200	ctrl	TRUE	149.18	1.23603	0.270842	4.56366	5.02697e-06	0.000201648
AT1G61800	ctrl	TRUE	164.403	-1.2359	0.319809	-3.8645	0.000111318	0.00231749
AT2G22620	ctrl	TRUE	58.3593	1.23577	0.262286	4.71152	2.45878e-06	0.000113182
AT1G12090	ctrl	TRUE	3617.42	-1.23576	0.132916	-9.29732	1.44029e-20	1.39596e-17
AT1G65450	ctrl	TRUE	21.7071	-1.23284	0.311894	-3.95275	7.72568e-05	0.00172368
AT4G16760	ctrl	TRUE	2985.87	1.23238	0.276835	4.45168	8.51999e-06	0.000300282
AT4G36670	ctrl	TRUE	151.596	-1.2317	0.240383	-5.12392	2.99246e-07	1.9553e-05
AT5G42500	ctrl	TRUE	55.7684	-1.23143	0.272167	-4.52453	6.05287e-06	0.000232166
AT1G50260	ctrl	TRUE	361.095	1.23065	0.299029	4.1155	3.86341e-05	0.00100087
AT5G39030	ctrl	TRUE	31.2858	1.2303	0.456666	2.6941	0.00705788	0.0493316
AT5G03120	ctrl	TRUE	50.2174	-1.22975	0.356819	-3.44644	0.000568034	0.00812289
AT3G25590	ctrl	TRUE	145.579	1.22613	0.155042	7.9084	2.60721e-15	1.42142e-12
AT4G26080	ctrl	TRUE	1576.22	1.22589	0.356752	3.43626	0.000589806	0.00833179
AT5G63130	ctrl	TRUE	58.7506	1.22474	0.324402	3.77538	0.000159764	0.00310037
AT4G21570	ctrl	TRUE	1439.03	1.22323	0.346771	3.52749	0.000419516	0.00646544
AT5G53760	ctrl	TRUE	469.022	1.22127	0.373896	3.26632	0.00108953	0.0129747
AT3G27060	ctrl	TRUE	307.305	-1.22118	0.23498	-5.19695	2.02588e-07	1.46047e-05
AT3G23430	ctrl	TRUE	719.82	1.22116	0.195461	6.24759	4.16825e-10	7.42033e-08
AT3G07555	ctrl	TRUE	41.6455	-1.21976	0.321602	-3.79277	0.000148975	0.00294674
AT5G47500	ctrl	TRUE	557.672	-1.21746	0.228564	-5.32658	1.00079e-07	8.33916e-06
AT2G46270	ctrl	TRUE	224.695	1.21615	0.310772	3.91331	9.10408e-05	0.00196086
AT1G73680	ctrl	TRUE	351.287	1.2152	0.393856	3.08538	0.00203292	0.0204653
AT3G10680	ctrl	TRUE	50.9344	1.21456	0.399133	3.04299	0.00234237	0.0226273
AT1G47960	ctrl	TRUE	61.0956	1.21385	0.38453	3.1567	0.00159567	0.017089
AT1G22930	ctrl	TRUE	1365.17	1.21337	0.336275	3.60827	0.000308242	0.00511181
AT1G72520	ctrl	TRUE	132.749	1.21297	0.389599	3.11337	0.00184962	0.0190374
AT4G03540	ctrl	TRUE	53.6777	1.21292	0.3511	3.45463	0.000551045	0.00793195
AT5G56100	ctrl	TRUE	72.3474	-1.20975	0.288193	-4.19772	2.69617e-05	0.000764834
AT4G28190	ctrl	TRUE	74.025	-1.20823	0.259995	-4.64711	3.36618e-06	0.000144646
AT1G69310	ctrl	TRUE	299.682	1.20739	0.24951	4.83907	1.30448e-06	6.61569e-05
AT2G34930	ctrl	TRUE	1225.35	1.20695	0.35979	3.3546	0.000794799	0.0103017
AT1G66980	ctrl	TRUE	390.063	-1.20666	0.201	-6.00328	1.93365e-09	2.93343e-07
AT2G28160	ctrl	TRUE	66.4742	-1.20637	0.318435	-3.78842	0.000151608	0.00298192
AT2G17230	ctrl	TRUE	539.592	-1.20546	0.233912	-5.15348	2.55697e-07	1.72277e-05
AT1G31320	ctrl	TRUE	46.7341	-1.20157	0.365984	-3.28312	0.00102665	0.012499
AT1G76240	ctrl	TRUE	137.354	-1.20098	0.298872	-4.01837	5.86017e-05	0.00137971
AT2G39800	ctrl	TRUE	5269.56	1.19971	0.295233	4.06361	4.83204e-05	0.00118732
AT5G13750	ctrl	TRUE	888.401	1.19881	0.42912	2.79364	0.0052118	0.0398794
AT3G19710	ctrl	TRUE	429.431	-1.19861	0.171986	-6.96924	3.18663e-12	1.04894e-09
AT5G56380	ctrl	TRUE	42.745	-1.19796	0.300781	-3.98284	6.80965e-05	0.00153887
AT5G15537	ctrl	TRUE	99.0366	1.19592	0.436712	2.73847	0.00617253	0.0448504
AT4G15530	ctrl	TRUE	1243.43	1.19445	0.225973	5.28581	1.25147e-07	9.9328e-06
AT2G41070	ctrl	TRUE	40.1251	1.19333	0.254763	4.68407	2.81232e-06	0.000126128
AT1G60030	ctrl	TRUE	37.8299	1.19277	0.384522	3.10196	0.00192247	0.019609
AT1G58270	ctrl	TRUE	3201.75	1.19256	0.407747	2.92476	0.00344723	0.0297725
AT2G42980	ctrl	TRUE	32.1302	1.19249	0.391753	3.04399	0.00233459	0.0225647
AT1G73325	ctrl	TRUE	105.448	1.1922	0.261152	4.56514	4.99162e-06	0.000201648
AT1G17020	ctrl	TRUE	44.064	1.19002	0.301243	3.95037	7.80305e-05	0.00173417
AT3G10520	ctrl	TRUE	79.5101	-1.18959	0.273387	-4.35131	1.35324e-05	0.000435639
AT1G61860	ctrl	TRUE	22.3479	1.18817	0.311479	3.81462	0.000136394	0.00272258
AT3G15030	ctrl	TRUE	561.074	-1.18785	0.211403	-5.61891	1.92166e-08	2.14905e-06
AT3G55970	ctrl	TRUE	243.049	1.18745	0.39794	2.98399	0.00284515	0.0258883
AT1G69870	ctrl	TRUE	1227.52	1.1873	0.424607	2.79622	0.00517036	0.0396493
AT5G15240	ctrl	TRUE	91.1566	1.18671	0.391664	3.02992	0.00244616	0.0232565
AT4G12000	ctrl	TRUE	111.415	1.1867	0.352314	3.36829	0.000756356	0.0099663
AT3G50750	ctrl	TRUE	91.3127	-1.18642	0.291141	-4.07509	4.5996e-05	0.00113822
AT1G52060	ctrl	TRUE	188.097	-1.18611	0.264398	-4.4861	7.25401e-06	0.000267555
AT4G22505	ctrl	TRUE	90.6465	-1.18593	0.347217	-3.41555	0.000636539	0.00879957
AT3G19390	ctrl	TRUE	564.956	1.18512	0.42635	2.77969	0.00544103	0.0410672
AT4G20830	ctrl	TRUE	941.793	1.18478	0.424036	2.79406	0.00520504	0.0398452
AT4G32460	ctrl	TRUE	387.25	1.18376	0.386142	3.0656	0.00217233	0.0214475
AT3G49220	ctrl	TRUE	2929.85	1.18244	0.324746	3.64112	0.000271451	0.00466115
AT4G22980	ctrl	TRUE	39.568	1.18193	0.364574	3.24194	0.00118718	0.0138446
AT1G30320	ctrl	TRUE	131.64	1.18137	0.263906	4.47649	7.58808e-06	0.000276234
AT1G72490	ctrl	TRUE	47.9074	1.1799	0.428242	2.75521	0.00586538	0.0432309
AT2G26440	ctrl	TRUE	130.325	-1.17967	0.276122	-4.27227	1.93492e-05	0.000580012
AT3G59140	ctrl	TRUE	1161.2	1.17953	0.421878	2.7959	0.00517552	0.0396714
AT4G22666	ctrl	TRUE	49.5146	-1.17888	0.228463	-5.16006	2.46866e-07	1.68235e-05
AT5G47560	ctrl	TRUE	3393	1.17854	0.39407	2.9907	0.00278343	0.0255332
AT3G49160	ctrl	TRUE	116.42	1.17814	0.238421	4.94144	7.75487e-07	4.37836e-05
AT1G32870	ctrl	TRUE	166.496	1.17738	0.271543	4.33589	1.45169e-05	0.000461316
AT1G66940	ctrl	TRUE	112.907	-1.17736	0.339158	-3.47143	0.000517696	0.00756448
AT3G17130	ctrl	TRUE	36.3478	1.17698	0.310732	3.78776	0.000152009	0.00298579
AT3G51080	ctrl	TRUE	66.4404	-1.17684	0.319556	-3.68273	0.000230747	0.00412038
AT1G73810	ctrl	TRUE	42.6448	1.17672	0.434785	2.70645	0.00680068	0.0481513
AT3G24240	ctrl	TRUE	535.013	1.17317	0.258698	4.53492	5.76256e-06	0.000225412
AT1G69600	ctrl	TRUE	40.412	1.1706	0.241497	4.84725	1.25183e-06	6.38579e-05
AT3G24460	ctrl	TRUE	379.457	1.16988	0.195868	5.97279	2.33232e-09	3.39081e-07
AT1G75750	ctrl	TRUE	616.14	-1.16906	0.166442	-7.02384	2.15854e-12	7.8454e-10
AT4G26320	ctrl	TRUE	40.5389	-1.16838	0.349201	-3.34587	0.000820262	0.0105229
AT1G02360	ctrl	TRUE	264.284	-1.16721	0.185022	-6.30847	2.81804e-10	5.34387e-08
AT2G38250	ctrl	TRUE	39.9481	1.16653	0.347215	3.35968	0.000780332	0.0101899
AT1G02816	ctrl	TRUE	153.306	1.16589	0.331808	3.51375	0.000441834	0.00670865
AT2G31560	ctrl	TRUE	155.862	1.16484	0.208506	5.58659	2.31568e-08	2.50927e-06
AT4G22517	ctrl	TRUE	240.151	-1.16445	0.132246	-8.80517	1.30652e-18	1.03607e-15
AT1G66950	ctrl	TRUE	37.2552	1.1627	0.255627	4.54841	5.40521e-06	0.000213347
AT5G24230	ctrl	TRUE	46.3913	-1.16201	0.368803	-3.15075	0.00162854	0.0173136
AT3G53800	ctrl	TRUE	56.2823	-1.16194	0.266196	-4.36498	1.27133e-05	0.000417059
AT2G33330	ctrl	TRUE	171.704	-1.16173	0.2604	-4.46134	8.14469e-06	0.000291173
AT5G44550	ctrl	TRUE	189.71	-1.16133	0.27813	-4.17551	2.97314e-05	0.000824634
AT3G58193	ctrl	TRUE	29.1122	-1.16073	0.328869	-3.52946	0.000416406	0.00643935
AT2G03310	ctrl	TRUE	51.9992	-1.15857	0.235126	-4.92744	8.33152e-07	4.59974e-05
AT2G31751	ctrl	TRUE	138.853	1.15648	0.334472	3.45764	0.000544925	0.00788269
AT4G06010	ctrl	TRUE	100.655	-1.15617	0.42685	-2.70861	0.00675661	0.047956
AT3G06070	ctrl	TRUE	41.5601	-1.15573	0.407819	-2.83394	0.00459782	0.0365438
AT3G45710	ctrl	TRUE	198.834	-1.15558	0.188533	-6.12936	8.82335e-10	1.4253e-07
AT4G31408	ctrl	TRUE	90.7363	1.15437	0.33603	3.43532	0.000591849	0.00834713
AT1G14580	ctrl	TRUE	226.129	-1.1541	0.290996	-3.96604	7.30771e-05	0.00163659
AT1G21460	ctrl	TRUE	195.001	1.15265	0.364835	3.15937	0.00158111	0.0169957
AT1G06360	ctrl	TRUE	361.868	-1.15068	0.27647	-4.16204	3.15419e-05	0.000861158
AT1G56650	ctrl	TRUE	240.053	1.15063	0.231872	4.96233	6.96524e-07	4.02369e-05
AT1G47128	ctrl	TRUE	5604.63	1.15044	0.292795	3.92918	8.52368e-05	0.0018588
AT3G53240	ctrl	TRUE	97.8217	-1.14938	0.170425	-6.74422	1.53849e-11	4.54924e-09
AT1G65890	ctrl	TRUE	54.8443	1.14933	0.293934	3.91018	9.22278e-05	0.00197494
AT3G57760	ctrl	TRUE	34.0712	1.1485	0.291542	3.93939	8.16881e-05	0.00179488
AT4G12520	ctrl	TRUE	35.8754	-1.14822	0.287139	-3.99883	6.36551e-05	0.00146122
AT1G28260	ctrl	TRUE	146.295	1.14765	0.310007	3.70203	0.000213879	0.00389492
AT3G01290	ctrl	TRUE	190.556	-1.14644	0.21643	-5.29703	1.17702e-07	9.5141e-06
AT5G52570	ctrl	TRUE	214.171	1.14627	0.182354	6.28596	3.25824e-10	6.04716e-08
AT3G13175	ctrl	TRUE	33.3246	-1.14593	0.260471	-4.39946	1.0852e-05	0.000371224
AT5G15860	ctrl	TRUE	153.425	1.14468	0.302913	3.7789	0.000157524	0.00306373
AT3G43190	ctrl	TRUE	35.3181	1.1442	0.3354	3.41145	0.000646182	0.0089117
AT4G23410	ctrl	TRUE	70.77	1.14357	0.238623	4.79234	1.64846e-06	8.124e-05
AT5G17390	ctrl	TRUE	27.2505	1.1432	0.395223	2.89254	0.00382137	0.0320672
AT5G13550	ctrl	TRUE	1200.91	1.14273	0.314961	3.62818	0.000285431	0.00484646
AT4G30660	ctrl	TRUE	63.5131	-1.13807	0.245435	-4.63696	3.53575e-06	0.000149781
AT1G77450	ctrl	TRUE	287.397	1.13632	0.252608	4.49837	6.84756e-06	0.000255808
AT1G36370	ctrl	TRUE	885.464	1.13592	0.323818	3.5079	0.000451658	0.00682219
AT3G25560	ctrl	TRUE	286.422	1.13556	0.288342	3.93824	8.20809e-05	0.00180124
AT3G05727	ctrl	TRUE	146.705	-1.1337	0.273403	-4.14662	3.37421e-05	0.000907034
AT5G64100	ctrl	TRUE	1829.58	-1.13368	0.243203	-4.66146	3.13976e-06	0.00013626
AT2G40370	ctrl	TRUE	185.468	1.13254	0.384323	2.94685	0.00321028	0.0282576
AT5G37550	ctrl	TRUE	22.5792	1.12998	0.349684	3.23142	0.00123175	0.0141749
AT1G12160	ctrl	TRUE	24.2614	-1.12845	0.306888	-3.67707	0.000235925	0.0041744
AT1G17147	ctrl	TRUE	13.2032	-1.12804	0.409988	-2.7514	0.00593411	0.0435717
AT5G44572	ctrl	TRUE	36.5423	1.12721	0.315089	3.57742	0.000347	0.00560014
AT5G06570	ctrl	TRUE	30.8155	-1.1258	0.341166	-3.29988	0.000967276	0.011909
AT5G22580	ctrl	TRUE	33.5468	-1.12362	0.414594	-2.71017	0.00672485	0.0477694
AT2G37870	ctrl	TRUE	76.1255	1.12178	0.389817	2.87771	0.00400578	0.0331051
AT5G26310	ctrl	TRUE	33.288	-1.12163	0.248626	-4.51133	6.44214e-06	0.000243795
AT3G24463	ctrl	TRUE	68.0238	1.12149	0.261317	4.29169	1.77317e-05	0.000540602
AT5G19875	ctrl	TRUE	98.1444	1.12116	0.383492	2.92354	0.00346075	0.0298707
AT3G13610	ctrl	TRUE	77.7383	-1.12105	0.212093	-5.28565	1.25256e-07	9.9328e-06
AT2G39530	ctrl	TRUE	117.079	-1.11895	0.194178	-5.76249	8.28797e-09	1.05802e-06
AT2G34510	ctrl	TRUE	291.232	-1.11793	0.214932	-5.20131	1.97894e-07	1.43255e-05
AT1G76930	ctrl	TRUE	3612.11	-1.11736	0.367545	-3.04006	0.00236532	0.0227859
AT1G01060	ctrl	TRUE	464.69	1.11692	0.200414	5.57309	2.50265e-08	2.69514e-06
AT2G47485	ctrl	TRUE	170.676	1.11631	0.346198	3.22449	0.00126197	0.0144181
AT5G03670	ctrl	TRUE	41.6369	1.11584	0.305722	3.64985	0.000262389	0.00453382
AT1G33170	ctrl	TRUE	258.383	-1.1157	0.249495	-4.47183	7.75533e-06	0.00027878
AT5G53970	ctrl	TRUE	282.425	1.11497	0.332641	3.35188	0.00080266	0.0103524
AT1G80110	ctrl	TRUE	73.4478	1.11493	0.375716	2.96747	0.0030026	0.0269799
AT3G20100	ctrl	TRUE	335.599	1.11429	0.32901	3.38679	0.00070715	0.00956233
AT1G04247	ctrl	TRUE	55.9347	1.11336	0.312901	3.55818	0.00037344	0.00593896
AT1G70985	ctrl	TRUE	32.0776	-1.1129	0.283218	-3.92947	8.51322e-05	0.0018588
AT4G26960	ctrl	TRUE	22.4183	-1.11284	0.339668	-3.27627	0.00105188	0.0126997
AT4G11190	ctrl	TRUE	136.624	-1.11201	0.23895	-4.65373	3.25989e-06	0.000140772
AT2G31830	ctrl	TRUE	37.5385	-1.1119	0.269273	-4.12928	3.63906e-05	0.000963385
AT1G75960	ctrl	TRUE	27.3817	-1.1119	0.28856	-3.85327	0.000116548	0.00241485
AT5G51780	ctrl	TRUE	41.9916	-1.11178	0.331413	-3.35468	0.00079457	0.0103017
AT1G61690	ctrl	TRUE	313.632	1.11096	0.176809	6.28341	3.3122e-10	6.0826e-08
AT3G16690	ctrl	TRUE	78.0452	-1.11052	0.221026	-5.0244	5.05007e-07	3.12424e-05
AT1G66520	ctrl	TRUE	36.206	-1.11039	0.248784	-4.46329	8.07112e-06	0.000289135
AT5G51550	ctrl	TRUE	599.908	-1.10994	0.200582	-5.53362	3.13693e-08	3.21923e-06
AT1G12280	ctrl	TRUE	143.333	1.10901	0.204013	5.43598	5.44964e-08	5.07545e-06
AT4G27830	ctrl	TRUE	653.946	1.10878	0.338749	3.27315	0.00106357	0.0127701
AT3G05820	ctrl	TRUE	21.8372	1.1082	0.38569	2.8733	0.00406207	0.0334278
AT1G16410	ctrl	TRUE	1021.41	-1.10768	0.201128	-5.50733	3.64313e-08	3.57348e-06
AT3G15450	ctrl	TRUE	102.406	-1.10722	0.397421	-2.786	0.00533627	0.0405826
AT2G27140	ctrl	TRUE	35.3588	1.10679	0.361826	3.05891	0.00222141	0.0217845
AT4G13572	ctrl	TRUE	41.5795	1.10601	0.273767	4.03998	5.34547e-05	0.00128631
AT3G14590	ctrl	TRUE	98.8493	1.10596	0.359435	3.07693	0.00209143	0.020912
AT4G34000	ctrl	TRUE	1141.06	1.10495	0.191977	5.75567	8.6297e-09	1.09097e-06
AT4G21410	ctrl	TRUE	367.533	-1.10463	0.293775	-3.76013	0.000169825	0.0032451
AT1G28660	ctrl	TRUE	117.806	-1.10353	0.246775	-4.47178	7.75701e-06	0.00027878
AT3G09270	ctrl	TRUE	338.562	-1.10348	0.189961	-5.80896	6.28606e-09	8.24561e-07
AT5G22880	ctrl	TRUE	289.765	-1.10322	0.325038	-3.39413	0.000688467	0.00934708
AT2G18050	ctrl	TRUE	15.7288	-1.10294	0.396339	-2.78283	0.00538872	0.0408746
AT5G20635	ctrl	TRUE	40.4761	-1.10172	0.232592	-4.73671	2.17215e-06	0.000101596
AT4G00750	ctrl	TRUE	371.332	1.10149	0.36677	3.00322	0.00267142	0.0247441
AT2G02980	ctrl	TRUE	34.0915	-1.09993	0.247316	-4.44747	8.68886e-06	0.000305617
AT1G04770	ctrl	TRUE	223.582	1.09982	0.304228	3.61512	0.00030021	0.00504573
AT3G56360	ctrl	TRUE	779.138	-1.09973	0.0919785	-11.9564	6.01048e-33	2.62147e-29
AT3G61310	ctrl	TRUE	205.152	-1.09938	0.275846	-3.98546	6.73489e-05	0.00152593
AT5G27520	ctrl	TRUE	139.158	1.09882	0.271715	4.04403	5.25401e-05	0.00126955
AT1G17745	ctrl	TRUE	704.521	1.09796	0.321974	3.41008	0.000649435	0.00894947
AT5G43450	ctrl	TRUE	120.389	1.09758	0.286489	3.83114	0.00012755	0.00259351
AT5G06165	ctrl	TRUE	777.083	-1.09731	0.192596	-5.69744	1.21617e-08	1.45324e-06
AT3G47790	ctrl	TRUE	123.907	1.09654	0.234434	4.6774	2.90539e-06	0.00012938
AT4G39190	ctrl	TRUE	36.4427	1.09608	0.400362	2.73772	0.00618663	0.0449155
AT5G54840	ctrl	TRUE	192.348	1.09411	0.297219	3.68115	0.000232186	0.00413339
AT5G20830	ctrl	TRUE	330.43	1.0928	0.339792	3.21608	0.00129954	0.014741
AT4G36430	ctrl	TRUE	69.5947	1.09233	0.370378	2.94923	0.00318565	0.0281713
AT3G55240	ctrl	TRUE	120.203	1.09084	0.221311	4.92899	8.26576e-07	4.58569e-05
AT5G51070	ctrl	TRUE	1831.47	1.08995	0.325761	3.34585	0.000820314	0.0105229
AT4G37240	ctrl	TRUE	48.0596	-1.08705	0.297602	-3.6527	0.000259497	0.00450465
AT3G54140	ctrl	TRUE	757.113	1.08566	0.34443	3.15205	0.0016213	0.0172763
AT1G73370	ctrl	TRUE	115.983	1.08483	0.360796	3.00677	0.00264043	0.0245108
AT1G52200	ctrl	TRUE	144.752	-1.08401	0.34772	-3.11749	0.001824	0.0188062
AT4G12980	ctrl	TRUE	715.683	-1.08383	0.248305	-4.3649	1.27178e-05	0.000417059
AT1G32240	ctrl	TRUE	201.864	1.08276	0.212759	5.08912	3.59736e-07	2.30734e-05
AT3G21230	ctrl	TRUE	190.442	1.08238	0.21329	5.07467	3.88167e-07	2.47152e-05
AT3G16240	ctrl	TRUE	3264.25	-1.08222	0.232159	-4.66155	3.13836e-06	0.00013626
AT1G20010	ctrl	TRUE	758.477	-1.08163	0.278419	-3.88488	0.000102379	0.00215714
AT5G16530	ctrl	TRUE	65.2255	-1.08159	0.386634	-2.79744	0.0051509	0.0396045
AT3G21210	ctrl	TRUE	26.7828	1.08127	0.315614	3.42593	0.000612707	0.00853777
AT3G55940	ctrl	TRUE	56.603	1.07848	0.29533	3.65179	0.000260417	0.00451166
AT3G46370	ctrl	TRUE	45.4045	-1.07762	0.286303	-3.76392	0.00016727	0.00320782
AT1G05300	ctrl	TRUE	77.7802	-1.07757	0.264989	-4.06648	4.77283e-05	0.00117608
AT1G04120	ctrl	TRUE	2884.44	1.07731	0.330125	3.26335	0.00110102	0.013067
AT5G19410	ctrl	TRUE	99.5761	1.07598	0.382805	2.81077	0.00494233	0.0384242
AT1G75190	ctrl	TRUE	21.5652	-1.07586	0.292135	-3.68274	0.000230739	0.00412038
AT5G55620	ctrl	TRUE	149.949	-1.0752	0.227404	-4.72814	2.26591e-06	0.000105136
AT1G62540	ctrl	TRUE	169.061	1.07452	0.235195	4.56864	4.90896e-06	0.000199167
AT1G03080	ctrl	TRUE	1142.21	1.0744	0.290019	3.70458	0.000211743	0.00387203
AT3G14690	ctrl	TRUE	1129.77	1.07383	0.3439	3.12251	0.00179315	0.0185547
AT2G04230	ctrl	TRUE	65.6761	-1.07378	0.201688	-5.32397	1.01527e-07	8.39449e-06
AT2G45850	ctrl	TRUE	109.091	-1.0721	0.263027	-4.07599	4.5819e-05	0.00113545
AT3G16660	ctrl	TRUE	631.512	-1.07164	0.271142	-3.95233	7.73929e-05	0.00172368
AT4G32340	ctrl	TRUE	38.7679	-1.0695	0.254164	-4.2079	2.57755e-05	0.000734769
AT3G44260	ctrl	TRUE	83.7537	-1.06912	0.213259	-5.01327	5.35134e-07	3.27382e-05
AT5G62720	ctrl	TRUE	277.569	-1.06595	0.206176	-5.1701	2.33974e-07	1.6134e-05
AT4G38860	ctrl	TRUE	214.541	-1.06452	0.308762	-3.44772	0.000565349	0.00809913
AT1G10020	ctrl	TRUE	286.049	-1.06219	0.1763	-6.02493	1.6918e-09	2.61197e-07
AT3G19270	ctrl	TRUE	46.3372	1.06173	0.376838	2.81748	0.00484015	0.037866
AT1G14185	ctrl	TRUE	50.0407	-1.06054	0.256242	-4.13882	3.49092e-05	0.000933034
AT1G32900	ctrl	TRUE	1798.62	1.06035	0.122638	8.64615	5.32644e-18	3.87188e-15
AT5G15160	ctrl	TRUE	15.5692	1.06006	0.343271	3.08811	0.00201432	0.0203249
AT1G78610	ctrl	TRUE	812.526	1.05912	0.326738	3.24148	0.00118909	0.0138531
AT5G41040	ctrl	TRUE	255.339	1.05866	0.255816	4.13838	3.49767e-05	0.000933034
AT5G66320	ctrl	TRUE	165.901	-1.05831	0.236594	-4.47313	7.70827e-06	0.000278668
AT1G03457	ctrl	TRUE	66.5604	-1.05756	0.252152	-4.19413	2.73921e-05	0.000772024
AT1G13990	ctrl	TRUE	199.343	1.05732	0.292996	3.60865	0.000307792	0.00511181
AT5G08260	ctrl	TRUE	252.782	1.05675	0.382114	2.76552	0.00568314	0.0422626
AT5G48940	ctrl	TRUE	186.738	1.0559	0.213101	4.95494	7.23544e-07	4.12515e-05
AT2G41640	ctrl	TRUE	71.1055	1.05589	0.369743	2.85575	0.00429355	0.0349046
AT1G51940	ctrl	TRUE	220.914	-1.054	0.165439	-6.37091	1.87905e-10	3.72522e-08
AT1G69360	ctrl	TRUE	255.12	1.05368	0.233192	4.51851	6.22762e-06	0.000237221
AT1G30545	ctrl	TRUE	20.7892	-1.05242	0.318901	-3.30015	0.000966322	0.0119057
AT3G47780	ctrl	TRUE	357.157	1.05171	0.343495	3.06179	0.00220014	0.0216246
AT1G09750	ctrl	TRUE	1661.87	-1.05153	0.251206	-4.18593	2.83995e-05	0.000795276
AT4G22200	ctrl	TRUE	506.015	1.05113	0.322922	3.25506	0.00113367	0.0133545
AT3G27870	ctrl	TRUE	188.248	1.05031	0.361835	2.90274	0.00369914	0.0313499
AT3G18050	ctrl	TRUE	712.697	-1.05024	0.17401	-6.03552	1.58447e-09	2.46809e-07
AT1G50790	ctrl	TRUE	27.6621	1.0501	0.274328	3.82789	0.000129245	0.00261647
AT2G34920	ctrl	TRUE	77.3745	1.04901	0.220525	4.7569	1.9659e-06	9.37077e-05
AT2G27385	ctrl	TRUE	450.698	-1.04875	0.198607	-5.28053	1.28812e-07	1.01686e-05
AT5G66630	ctrl	TRUE	21.3891	1.04768	0.35052	2.98892	0.00279964	0.0256123
AT4G25220	ctrl	TRUE	78.3102	-1.04713	0.278974	-3.75351	0.000174374	0.00330307
AT3G29250	ctrl	TRUE	263.965	-1.04553	0.211912	-4.93381	8.0642e-07	4.52373e-05
AT1G32170	ctrl	TRUE	186.228	1.04317	0.371191	2.81034	0.00494895	0.0384402
AT5G58770	ctrl	TRUE	192.441	1.04282	0.138466	7.53122	5.02671e-14	2.30779e-11
AT3G48460	ctrl	TRUE	869.19	1.04264	0.344666	3.02506	0.0024858	0.0234892
AT5G27350	ctrl	TRUE	1390.45	1.04245	0.371589	2.80538	0.00502578	0.0389342
AT4G28790	ctrl	TRUE	45.0407	1.04132	0.274423	3.79459	0.000147889	0.00292856
AT2G44300	ctrl	TRUE	117.068	1.04098	0.340756	3.05492	0.0022512	0.0220148
AT5G65410	ctrl	TRUE	138.187	-1.03985	0.310236	-3.3518	0.000802869	0.0103524
AT5G03860	ctrl	TRUE	24.8963	-1.03979	0.327982	-3.17028	0.00152292	0.0165521
AT4G39210	ctrl	TRUE	498.423	1.03694	0.260793	3.97611	7.00528e-05	0.00157696
AT1G26690	ctrl	TRUE	96.4056	1.03668	0.352471	2.94118	0.00326965	0.0286501
AT1G16310	ctrl	TRUE	69.2929	1.03574	0.363997	2.84546	0.0044347	0.0356316
AT1G60270	ctrl	TRUE	386.963	1.03551	0.114544	9.04034	1.56192e-19	1.36247e-16
AT1G52050	ctrl	TRUE	70.404	-1.03504	0.272233	-3.80203	0.000143517	0.0028517
AT1G22550	ctrl	TRUE	253.243	-1.03364	0.221345	-4.66982	3.01458e-06	0.000132809
AT2G39850	ctrl	TRUE	224.908	1.03319	0.341037	3.02956	0.00244913	0.0232643
AT1G10610	ctrl	TRUE	44.9777	-1.0331	0.25643	-4.02878	5.60677e-05	0.00133446
AT5G43350	ctrl	TRUE	1245.44	-1.03285	0.194627	-5.30683	1.11549e-07	9.13655e-06
AT1G61275	ctrl	TRUE	705.799	-1.03244	0.32971	-3.13136	0.00174001	0.0181665
AT5G43580	ctrl	TRUE	96.4414	-1.03238	0.220366	-4.68483	2.80186e-06	0.000125983
AT1G67360	ctrl	TRUE	288.116	1.03117	0.311054	3.31509	0.000916123	0.0114407
AT1G07560	ctrl	TRUE	57.005	-1.03018	0.298498	-3.4512	0.000558099	0.00802026
AT4G23600	ctrl	TRUE	2213.89	1.02854	0.31786	3.23583	0.00121288	0.0140599
AT5G22875	ctrl	TRUE	38.8937	-1.0281	0.267459	-3.84393	0.000121079	0.0024822
AT5G09620	ctrl	TRUE	577.35	1.02737	0.183267	5.60585	2.07238e-08	2.28828e-06
AT3G08920	ctrl	TRUE	133.403	-1.02704	0.330348	-3.10896	0.00187745	0.0192784
AT5G04680	ctrl	TRUE	33.792	1.02661	0.338153	3.03594	0.00239785	0.0229347
AT2G46330	ctrl	TRUE	455.202	-1.02481	0.303908	-3.3721	0.000745968	0.00990423
AT1G51140	ctrl	TRUE	386.163	1.02387	0.189443	5.40464	6.49373e-08	5.80972e-06
AT2G06925	ctrl	TRUE	50.3499	-1.02351	0.204907	-4.99502	5.88307e-07	3.53917e-05
AT5G13910	ctrl	TRUE	28.8141	1.02214	0.284207	3.59646	0.000322574	0.00530701
AT3G24420	ctrl	TRUE	228.78	1.02188	0.260159	3.92789	8.56958e-05	0.00186648
AT5G54250	ctrl	TRUE	592.884	1.02128	0.369353	2.76506	0.0056913	0.0423052
AT5G23480	ctrl	TRUE	21.1282	1.02122	0.309508	3.2995	0.000968587	0.0119168
AT3G47740	ctrl	TRUE	28.6565	1.01968	0.328385	3.10513	0.00190194	0.019433
AT4G24015	ctrl	TRUE	35.3626	-1.01688	0.25549	-3.98013	6.88787e-05	0.00155273
AT3G27170	ctrl	TRUE	649.977	1.01608	0.265745	3.82353	0.000131554	0.00265022
AT4G22490	ctrl	TRUE	484.107	-1.01584	0.164786	-6.1646	7.06616e-10	1.18535e-07
AT1G34245	ctrl	TRUE	26.8783	-1.01496	0.31614	-3.21047	0.0013252	0.0149931
AT1G24430	ctrl	TRUE	33.56	1.01394	0.277925	3.64824	0.000264047	0.00455644
AT3G24670	ctrl	TRUE	301.501	1.01338	0.312999	3.23763	0.00120525	0.0139962
AT1G29660	ctrl	TRUE	1337.65	-1.01235	0.212538	-4.76316	1.90585e-06	9.15964e-05
AT1G70500	ctrl	TRUE	23.7045	1.01208	0.353762	2.8609	0.00422443	0.0344229
AT5G07680	ctrl	TRUE	40.0069	1.01105	0.340839	2.96635	0.00301357	0.0270372
AT3G45650	ctrl	TRUE	210.136	-1.01	0.235398	-4.29062	1.78176e-05	0.000540602
AT4G30650	ctrl	TRUE	328.556	-1.00912	0.311145	-3.24325	0.00118174	0.0137904
AT3G20670	ctrl	TRUE	121.73	-1.00909	0.285336	-3.53648	0.00040549	0.00632752
AT3G27250	ctrl	TRUE	335.798	1.00901	0.25732	3.92122	8.81028e-05	0.00190937
AT5G05110	ctrl	TRUE	55.9813	1.00898	0.358289	2.81611	0.00486084	0.0379598
AT3G12520	ctrl	TRUE	215.871	1.00868	0.332047	3.03776	0.00238347	0.0228923
AT1G12440	ctrl	TRUE	258.583	-1.00775	0.349885	-2.88023	0.0039738	0.0329353
AT1G19640	ctrl	TRUE	58.1829	1.00602	0.216723	4.64195	3.45133e-06	0.000147218
AT3G28100	ctrl	TRUE	181.006	1.0056	0.319712	3.14532	0.00165907	0.0176043
AT1G35910	ctrl	TRUE	25.7381	1.00478	0.306841	3.2746	0.00105812	0.0127471
AT1G16635	ctrl	TRUE	22.7571	-1.00234	0.338291	-2.96295	0.00304704	0.0271772
AT5G45820	ctrl	TRUE	263.357	-1.0022	0.229056	-4.37534	1.21242e-05	0.000402893
AT5G23980	ctrl	TRUE	97.8562	-1.00104	0.323542	-3.09399	0.00197484	0.0200192
AT3G22930	ctrl	TRUE	22.5631	1.00043	0.368748	2.71303	0.00666711	0.0474753

## Sheet: salt_DEGs_elf7-3VSCol0
geneID	condition	.abundant	baseMean	log2FoldChange	lfcSE	stat	pvalue	padj
AT1G13650	NaCl	TRUE	62.5269	-2.89328	0.322704	-8.96573	3.08237e-19	5.975e-16
AT5G05250	NaCl	TRUE	57.9684	-2.83462	0.408125	-6.94548	3.77183e-12	1.34293e-09
AT1G21100	NaCl	TRUE	55.7642	-2.69466	0.304866	-8.83883	9.67236e-19	1.31261e-15
AT4G33970	NaCl	TRUE	69.8846	2.67983	0.271108	9.88475	4.84775e-23	1.05717e-19
AT1G77080	NaCl	TRUE	107.638	-2.4869	0.221238	-11.2408	2.56918e-29	1.49406e-25
AT3G19430	NaCl	TRUE	233.059	-2.35207	0.348334	-6.75232	1.45499e-11	4.37652e-09
AT1G52100	NaCl	TRUE	157.556	-2.34827	0.175373	-13.3902	6.90143e-41	1.20402e-36
AT3G16670	NaCl	TRUE	332.022	-2.33696	0.310902	-7.51673	5.61645e-14	2.96923e-11
AT4G16857	NaCl	TRUE	33.1781	-2.28398	0.327278	-6.9787	2.97921e-12	1.08282e-09
AT1G52040	NaCl	TRUE	135.682	-2.22492	0.214533	-10.371	3.35942e-25	9.76808e-22
AT2G18800	NaCl	TRUE	32.9993	-2.1851	0.45994	-4.75084	2.02574e-06	0.000130893
AT5G36910	NaCl	TRUE	376.502	-2.14455	0.186176	-11.5189	1.05913e-30	9.2388e-27
AT1G31690	NaCl	TRUE	29.2929	-2.13169	0.483888	-4.40533	1.05621e-05	0.0005295
AT5G48490	NaCl	TRUE	46.9362	-2.12369	0.325553	-6.52333	6.87652e-11	1.68969e-08
AT1G76800	NaCl	TRUE	37.3161	2.08094	0.312613	6.65659	2.80249e-11	7.76068e-09
AT5G35940	NaCl	TRUE	42.2337	-2.01821	0.419819	-4.80733	1.52957e-06	0.000102279
AT4G22666	NaCl	TRUE	23.4721	-2.01217	0.409307	-4.91604	8.83132e-07	6.50282e-05
AT1G72760	NaCl	TRUE	87.5744	1.99107	0.264299	7.53341	4.9433e-14	2.69502e-11
AT4G37160	NaCl	TRUE	90.2352	-1.96999	0.378572	-5.20374	1.95318e-07	1.80292e-05
AT1G14250	NaCl	TRUE	156.209	-1.94597	0.282814	-6.88072	5.9549e-12	1.91291e-09
AT5G47980	NaCl	TRUE	34.4488	-1.93187	0.316726	-6.09951	1.06394e-09	2.05338e-07
AT1G16410	NaCl	TRUE	577.68	-1.90936	0.315717	-6.04768	1.46945e-09	2.67042e-07
AT5G62340	NaCl	TRUE	36.2642	-1.88867	0.32166	-5.87163	4.31536e-09	7.10243e-07
AT3G46370	NaCl	TRUE	29.1505	-1.87406	0.345515	-5.42394	5.82988e-08	6.73563e-06
AT2G28720	NaCl	TRUE	30.3229	-1.86115	0.326556	-5.69933	1.20281e-08	1.74869e-06
AT3G06345	NaCl	TRUE	1583.85	-1.85888	0.170234	-10.9196	9.29324e-28	4.05325e-24
AT2G18193	NaCl	TRUE	172.94	1.84793	0.362751	5.09422	3.50178e-07	2.90915e-05
AT2G41990	NaCl	TRUE	14.2363	-1.84728	0.457528	-4.03752	5.40199e-05	0.0020399
AT3G09160	NaCl	TRUE	28.1614	-1.83147	0.394211	-4.64591	3.38585e-06	0.000201816
AT5G52900	NaCl	TRUE	68.1781	-1.82512	0.289262	-6.30958	2.79796e-10	6.02633e-08
AT5G44580	NaCl	TRUE	220.357	-1.79756	0.211276	-8.50809	1.76821e-17	1.62359e-14
AT5G60520	NaCl	TRUE	58.8532	-1.77917	0.536999	-3.31317	0.000922449	0.0176073
AT1G16445	NaCl	TRUE	14.0733	-1.75663	0.4739	-3.70676	0.000209929	0.00572127
AT5G48000	NaCl	TRUE	250.068	-1.75437	0.287741	-6.09707	1.08033e-09	2.05338e-07
AT1G73220	NaCl	TRUE	41.0531	1.75288	0.37926	4.62185	3.80331e-06	0.000220742
AT1G52060	NaCl	TRUE	128.136	-1.72344	0.285846	-6.02926	1.64707e-09	2.96236e-07
AT3G08040	NaCl	TRUE	93.2196	1.72339	0.30316	5.68475	1.31004e-08	1.87335e-06
AT2G36750	NaCl	TRUE	154.9	1.72097	0.199738	8.61613	6.92533e-18	7.10702e-15
AT4G01130	NaCl	TRUE	43.3169	-1.71375	0.364748	-4.69846	2.62133e-06	0.000161027
AT4G11650	NaCl	TRUE	138.871	1.69383	0.34093	4.96827	6.75542e-07	5.20302e-05
AT5G04120	NaCl	TRUE	48.8025	-1.68922	0.326283	-5.17717	2.25273e-07	2.02583e-05
AT3G41762	NaCl	TRUE	576.02	-1.66635	0.195998	-8.50186	1.86569e-17	1.62744e-14
AT5G14890	NaCl	TRUE	29.943	1.66074	0.425689	3.9013	9.56762e-05	0.00313165
AT1G77210	NaCl	TRUE	19.2692	-1.64492	0.396187	-4.15189	3.29745e-05	0.00137297
AT4G21326	NaCl	TRUE	41.194	-1.64131	0.283915	-5.78099	7.42602e-09	1.16716e-06
AT1G29090	NaCl	TRUE	28.5616	-1.63847	0.46398	-3.53134	0.000413456	0.00960252
AT5G23020	NaCl	TRUE	74.7046	1.62795	0.285355	5.705	1.16343e-08	1.70565e-06
AT4G27440	NaCl	TRUE	921.242	-1.62011	0.2953	-5.48632	4.10395e-08	5.00682e-06
AT4G11780	NaCl	TRUE	23.3362	-1.61315	0.377077	-4.27804	1.88544e-05	0.000856598
AT1G47510	NaCl	TRUE	51.015	1.60745	0.295022	5.44855	5.07815e-08	6.05038e-06
AT5G56380	NaCl	TRUE	34.6909	-1.57633	0.321269	-4.90659	9.26726e-07	6.76471e-05
AT4G38860	NaCl	TRUE	127.911	-1.57334	0.183499	-8.57411	9.98578e-18	9.67844e-15
AT5G02760	NaCl	TRUE	21.7658	-1.56673	0.388555	-4.03219	5.52596e-05	0.0020688
AT4G24340	NaCl	TRUE	53.0265	-1.56	0.321128	-4.85789	1.1864e-06	8.16134e-05
AT5G62280	NaCl	TRUE	36.1974	-1.55694	0.362636	-4.29339	1.75963e-05	0.000803627
AT4G01460	NaCl	TRUE	27.7042	-1.55124	0.319996	-4.84769	1.24906e-06	8.54551e-05
AT1G73600	NaCl	TRUE	442.425	-1.54912	0.206415	-7.50486	6.14937e-14	3.15535e-11
AT1G56300	NaCl	TRUE	67.4716	-1.52736	0.24804	-6.15773	7.37957e-10	1.49702e-07
AT1G10585	NaCl	TRUE	58.3538	1.52685	0.215212	7.09461	1.29719e-12	5.14337e-10
AT5G24070	NaCl	TRUE	19.5166	-1.51992	0.407001	-3.73443	0.000188141	0.00525169
AT2G45180	NaCl	TRUE	1200.89	-1.5178	0.201206	-7.54353	4.57431e-14	2.5743e-11
AT4G30660	NaCl	TRUE	68.6647	-1.50898	0.31994	-4.71644	2.40008e-06	0.000150078
AT1G68190	NaCl	TRUE	86.8926	-1.5055	0.329167	-4.57367	4.79244e-06	0.000266271
AT3G58550	NaCl	TRUE	134.745	1.50412	0.289447	5.19652	2.03052e-07	1.85468e-05
AT2G33790	NaCl	TRUE	166.109	-1.50408	0.318492	-4.7225	2.32966e-06	0.000147258
AT4G12470	NaCl	TRUE	55.1645	-1.50079	0.455273	-3.29646	0.00097912	0.0185671
AT4G14548	NaCl	TRUE	34.6647	1.49402	0.322991	4.62558	3.73556e-06	0.000218693
AT1G66980	NaCl	TRUE	286.603	-1.49382	0.225502	-6.62446	3.48532e-11	9.50075e-09
AT5G26920	NaCl	TRUE	21.4635	-1.48195	0.380206	-3.89777	9.70835e-05	0.00316636
AT2G39530	NaCl	TRUE	78.6461	-1.47923	0.323546	-4.57193	4.83248e-06	0.000267642
AT4G34950	NaCl	TRUE	814.381	-1.4784	0.364577	-4.0551	5.01132e-05	0.00192148
AT1G76930	NaCl	TRUE	2525.02	-1.47461	0.253426	-5.81871	5.93023e-09	9.40534e-07
AT5G33370	NaCl	TRUE	42.2968	-1.47332	0.318802	-4.62144	3.81087e-06	0.000220742
AT4G32340	NaCl	TRUE	37.7645	-1.47207	0.383512	-3.83839	0.000123843	0.00383078
AT3G05655	NaCl	TRUE	55.0747	-1.45977	0.473318	-3.08413	0.0020415	0.0322902
AT1G31173	NaCl	TRUE	38.3878	-1.45216	0.272708	-5.32498	1.00965e-07	1.05475e-05
AT3G49160	NaCl	TRUE	138.788	1.45158	0.195907	7.40954	1.26743e-13	6.14208e-11
AT1G22570	NaCl	TRUE	74.0206	-1.45045	0.225997	-6.41801	1.38068e-10	3.16938e-08
AT5G50820	NaCl	TRUE	20.2627	1.44704	0.358612	4.03511	5.4576e-05	0.00205644
AT3G59330	NaCl	TRUE	24.2696	-1.43583	0.362508	-3.96081	7.46953e-05	0.00262729
AT2G45560	NaCl	TRUE	227.004	-1.43212	0.252382	-5.67442	1.39156e-08	1.92675e-06
AT4G18375	NaCl	TRUE	20.7705	-1.42908	0.359555	-3.97458	7.05024e-05	0.00251757
AT1G52050	NaCl	TRUE	46.7585	-1.42675	0.35944	-3.96938	7.20606e-05	0.00255522
AT3G09162	NaCl	TRUE	26.7685	-1.4206	0.342458	-4.14823	3.35052e-05	0.00138515
AT5G42580	NaCl	TRUE	124.579	-1.41008	0.36029	-3.91375	9.08731e-05	0.00302756
AT4G23300	NaCl	TRUE	103.957	-1.40773	0.258992	-5.43544	5.46602e-08	6.40002e-06
AT3G60160	NaCl	TRUE	91.9795	1.40427	0.407764	3.44383	0.000573533	0.0122321
AT1G52070	NaCl	TRUE	313.152	-1.40259	0.273197	-5.13399	2.8366e-07	2.46205e-05
AT4G12520	NaCl	TRUE	15.0122	-1.39902	0.429032	-3.26087	0.0011107	0.0206802
AT4G29030	NaCl	TRUE	422.886	-1.39171	0.180526	-7.7092	1.26609e-14	7.88863e-12
AT2G30790	NaCl	TRUE	16.6298	-1.38753	0.474988	-2.9212	0.00348687	0.0470107
AT3G02020	NaCl	TRUE	267.65	-1.38626	0.163218	-8.49331	2.00842e-17	1.66852e-14
AT2G03530	NaCl	TRUE	22.8931	-1.38465	0.334712	-4.13685	3.5211e-05	0.00143526
AT5G23980	NaCl	TRUE	70.2376	-1.38221	0.363898	-3.79835	0.00014566	0.00431439
AT3G19710	NaCl	TRUE	248.291	-1.37598	0.212887	-6.46341	1.02371e-10	2.4805e-08
AT3G13175	NaCl	TRUE	40.4577	-1.37471	0.303636	-4.5275	5.96864e-06	0.000322381
AT5G38020	NaCl	TRUE	194.588	-1.3734	0.173078	-7.93517	2.10201e-15	1.41045e-12
AT5G37300	NaCl	TRUE	75.753	-1.37208	0.396552	-3.46003	0.000540112	0.0117345
AT4G24670	NaCl	TRUE	93.2545	-1.37001	0.368167	-3.72116	0.000198307	0.00544606
AT1G73850	NaCl	TRUE	76.4261	1.36828	0.256372	5.33707	9.44596e-08	1.00374e-05
AT2G16005	NaCl	TRUE	111.932	-1.36328	0.248364	-5.48903	4.04138e-08	4.96521e-06
AT1G71200	NaCl	TRUE	32.2773	-1.36118	0.332156	-4.09801	4.16721e-05	0.0016523
AT1G30730	NaCl	TRUE	87.1883	1.35936	0.365674	3.71742	0.000201269	0.00550367
AT4G15340	NaCl	TRUE	42.4733	1.35831	0.249358	5.44722	5.11618e-08	6.05038e-06
AT3G15510	NaCl	TRUE	31.7588	-1.35502	0.3821	-3.54625	0.000390759	0.00926247
AT2G42380	NaCl	TRUE	90.0979	-1.35225	0.238641	-5.66644	1.45792e-08	2.00275e-06
AT1G54010	NaCl	TRUE	1260	-1.3478	0.255494	-5.27527	1.32559e-07	1.32905e-05
AT3G21890	NaCl	TRUE	68.8223	1.345	0.22748	5.91264	3.36669e-09	5.75837e-07
AT2G42530	NaCl	TRUE	196.202	-1.34152	0.203891	-6.57959	4.71733e-11	1.19273e-08
AT5G54230	NaCl	TRUE	58.9044	1.34053	0.281357	4.76451	1.89317e-06	0.000123174
AT1G35910	NaCl	TRUE	34.4566	1.33756	0.283926	4.71095	2.4656e-06	0.000153625
AT2G03310	NaCl	TRUE	39.4103	-1.32826	0.280705	-4.73185	2.22479e-06	0.000141656
AT5G14180	NaCl	TRUE	39.4875	1.32617	0.339819	3.90258	9.51732e-05	0.00312691
AT5G26622	NaCl	TRUE	98.2999	-1.32221	0.231043	-5.72278	1.04797e-08	1.56264e-06
AT3G16660	NaCl	TRUE	478.585	-1.3218	0.207506	-6.36991	1.89137e-10	4.2853e-08
AT2G15220	NaCl	TRUE	38.3934	1.31883	0.409182	3.2231	0.00126812	0.0227142
AT2G37770	NaCl	TRUE	632.758	1.31808	0.150012	8.78647	1.54337e-18	1.92326e-15
AT3G22100	NaCl	TRUE	32.9091	-1.3151	0.407777	-3.22504	0.00125956	0.022584
AT1G34580	NaCl	TRUE	16.9766	-1.3141	0.397172	-3.30865	0.00093746	0.0178352
AT1G06100	NaCl	TRUE	31.2026	-1.31123	0.317584	-4.12876	3.64724e-05	0.00147976
AT1G12750	NaCl	TRUE	134.469	-1.30879	0.221898	-5.89817	3.67563e-09	6.16588e-07
AT3G04000	NaCl	TRUE	68.7509	1.3081	0.220358	5.93624	2.91637e-09	5.03753e-07
AT5G01600	NaCl	TRUE	1781.43	1.30328	0.240675	5.41509	6.12564e-08	6.94625e-06
AT5G53250	NaCl	TRUE	56.181	-1.30319	0.278747	-4.67515	2.93735e-06	0.000178554
AT1G60750	NaCl	TRUE	83.2036	1.30149	0.256933	5.0655	4.07328e-07	3.30523e-05
AT4G00970	NaCl	TRUE	21.3571	-1.30039	0.364481	-3.56778	0.000360015	0.00871126
AT4G06010	NaCl	TRUE	43.1646	-1.29875	0.409204	-3.17385	0.00150432	0.025755
AT4G23210	NaCl	TRUE	22.1736	-1.29797	0.428516	-3.02898	0.00245383	0.0367779
AT1G02670	NaCl	TRUE	24.1953	1.29465	0.356111	3.63554	0.000277404	0.00708577
AT4G36850	NaCl	TRUE	111.114	-1.29317	0.33097	-3.90721	9.33689e-05	0.00308507
AT5G17760	NaCl	TRUE	399.818	1.29273	0.29168	4.43202	9.33563e-06	0.000476226
AT2G28900	NaCl	TRUE	114.837	-1.29082	0.208953	-6.17758	6.50914e-10	1.35189e-07
AT2G05160	NaCl	TRUE	31.5917	-1.28852	0.289417	-4.45211	8.50303e-06	0.0004415
AT2G18650	NaCl	TRUE	34.7717	-1.28462	0.400285	-3.20926	0.00133079	0.0234515
AT5G11470	NaCl	TRUE	31.0611	-1.28341	0.308383	-4.16173	3.15841e-05	0.00133418
AT1G02800	NaCl	TRUE	29.7218	-1.2823	0.36315	-3.53105	0.000413911	0.00960252
AT2G34430	NaCl	TRUE	6874.74	-1.27838	0.352858	-3.62293	0.000291285	0.00735498
AT4G13770	NaCl	TRUE	752.788	-1.27676	0.23904	-5.34119	9.23359e-08	9.88277e-06
AT2G34070	NaCl	TRUE	710.534	1.27163	0.126662	10.0396	1.02122e-23	2.54517e-20
AT1G31290	NaCl	TRUE	18.8012	1.26924	0.346929	3.65851	0.000253685	0.00660567
AT3G47110	NaCl	TRUE	50.0291	-1.26856	0.301478	-4.2078	2.5787e-05	0.00112251
AT4G37900	NaCl	TRUE	24.8296	1.26551	0.304999	4.14924	3.33583e-05	0.00138515
AT2G36780	NaCl	TRUE	165.159	1.26515	0.330987	3.82235	0.000132185	0.0040387
AT2G25220	NaCl	TRUE	15.2094	-1.26189	0.428959	-2.94176	0.00326357	0.0449288
AT4G21650	NaCl	TRUE	248.193	-1.26161	0.392938	-3.21071	0.00132409	0.0234043
AT1G15002	NaCl	TRUE	164.093	-1.26098	0.214965	-5.866	4.46422e-09	7.27876e-07
AT4G30650	NaCl	TRUE	254.586	-1.25257	0.234343	-5.34503	9.04014e-08	9.73545e-06
AT4G22212	NaCl	TRUE	111.108	-1.24959	0.334082	-3.74036	0.000183757	0.00515939
AT3G50930	NaCl	TRUE	70.8482	1.24883	0.281433	4.43739	9.1056e-06	0.000467225
AT1G23020	NaCl	TRUE	290.237	-1.24754	0.28411	-4.39104	1.12811e-05	0.000559119
AT1G29500	NaCl	TRUE	23.1841	-1.24371	0.337616	-3.6838	0.000229785	0.0061485
AT4G19680	NaCl	TRUE	31.8112	-1.24346	0.394043	-3.15564	0.00160147	0.0268132
AT5G13210	NaCl	TRUE	98.9461	-1.23833	0.251014	-4.93331	8.08464e-07	6.07951e-05
AT3G27650	NaCl	TRUE	35.1008	1.23698	0.292543	4.22836	2.35403e-05	0.00103708
AT3G53800	NaCl	TRUE	73.8733	-1.23675	0.309499	-3.99597	6.44293e-05	0.00236141
AT3G02640	NaCl	TRUE	172.292	-1.23543	0.16822	-7.34414	2.07091e-13	9.33159e-11
AT1G56520	NaCl	TRUE	42.3157	-1.23532	0.313031	-3.94634	7.93558e-05	0.00275539
AT4G17810	NaCl	TRUE	41.1209	-1.23359	0.311985	-3.95401	7.68511e-05	0.00269226
AT1G29230	NaCl	TRUE	49.4543	1.22868	0.25017	4.91137	9.04422e-07	6.62964e-05
AT1G51830	NaCl	TRUE	126.293	-1.22518	0.387532	-3.16149	0.00156963	0.0264833
AT3G62680	NaCl	TRUE	528.431	-1.21933	0.346463	-3.51936	0.000432591	0.00994807
AT1G12090	NaCl	TRUE	3376.56	-1.21906	0.112426	-10.8432	2.14774e-27	7.49391e-24
AT5G62980	NaCl	TRUE	21.7283	-1.21775	0.336721	-3.61648	0.000298632	0.00747479
AT3G08870	NaCl	TRUE	76.9869	1.21641	0.349293	3.4825	0.000496754	0.0110823
AT4G17490	NaCl	TRUE	17.2193	1.21328	0.358022	3.38885	0.000701875	0.0142881
AT3G18050	NaCl	TRUE	460.297	-1.21308	0.159283	-7.6159	2.61869e-14	1.57537e-11
AT3G28220	NaCl	TRUE	2587.28	-1.21219	0.307308	-3.94455	7.99506e-05	0.0027675
AT3G08860	NaCl	TRUE	437.993	1.21112	0.149954	8.07658	6.66065e-16	4.64807e-13
AT5G23010	NaCl	TRUE	910.988	-1.21013	0.145198	-8.33433	7.79351e-17	6.18026e-14
AT1G29910	NaCl	TRUE	13947.6	-1.20999	0.309176	-3.91359	9.09345e-05	0.00302756
AT3G03470	NaCl	TRUE	895.425	1.20488	0.384918	3.13022	0.00174677	0.0288096
AT3G56360	NaCl	TRUE	841.694	-1.20457	0.230852	-5.21791	1.8095e-07	1.71568e-05
AT5G48010	NaCl	TRUE	595.181	-1.20241	0.198798	-6.04838	1.4631e-09	2.67042e-07
AT3G05370	NaCl	TRUE	62.3242	-1.2011	0.307837	-3.90176	9.54975e-05	0.00313165
AT4G19690	NaCl	TRUE	21.6747	-1.19747	0.36812	-3.25292	0.00114225	0.0211167
AT2G39040	NaCl	TRUE	31.364	-1.19578	0.346752	-3.44852	0.000563659	0.0120954
AT1G02850	NaCl	TRUE	1398.46	1.19569	0.246127	4.85802	1.18567e-06	8.16134e-05
AT5G49010	NaCl	TRUE	17.3029	-1.19475	0.394024	-3.03218	0.00242797	0.0364996
AT2G36950	NaCl	TRUE	249.574	1.19204	0.213552	5.58196	2.37821e-08	3.1432e-06
AT5G55620	NaCl	TRUE	165.517	-1.19125	0.18864	-6.31493	2.7028e-10	5.89414e-08
AT2G41070	NaCl	TRUE	52.3544	1.18926	0.231202	5.14379	2.69248e-07	2.36045e-05
AT1G29195	NaCl	TRUE	47.8002	1.18807	0.236989	5.0132	5.35328e-07	4.2841e-05
AT4G02270	NaCl	TRUE	69.9586	-1.18747	0.39355	-3.01732	0.00255018	0.0377357
AT4G33610	NaCl	TRUE	365.301	-1.18389	0.337665	-3.5061	0.000454726	0.0103296
AT1G65860	NaCl	TRUE	91.5667	-1.1833	0.22841	-5.18058	2.21201e-07	1.99952e-05
AT1G52400	NaCl	TRUE	4326.17	-1.17822	0.326962	-3.60354	0.00031391	0.00774607
AT2G13550	NaCl	TRUE	32.0088	-1.17677	0.347725	-3.3842	0.000713864	0.0144815
AT5G07130	NaCl	TRUE	128.418	-1.17438	0.380328	-3.08781	0.00201639	0.0320483
AT1G09500	NaCl	TRUE	144.159	1.17418	0.225903	5.1977	2.0177e-07	1.85267e-05
AT1G01060	NaCl	TRUE	420.88	1.17182	0.177889	6.58736	4.47711e-11	1.14864e-08
AT4G27400	NaCl	TRUE	38.7571	-1.17102	0.334638	-3.49936	0.00046638	0.0105531
AT1G80130	NaCl	TRUE	73.3038	-1.17071	0.257928	-4.53891	5.65449e-06	0.000308276
AT3G12500	NaCl	TRUE	248.316	1.16898	0.375238	3.11529	0.00183763	0.0300181
AT5G28510	NaCl	TRUE	323.654	-1.16655	0.38184	-3.05508	0.00225	0.0344662
AT4G19380	NaCl	TRUE	56.7825	-1.16432	0.339705	-3.42744	0.000609293	0.0128224
AT1G12700	NaCl	TRUE	33.5081	-1.1643	0.362792	-3.20929	0.00133064	0.0234515
AT1G31580	NaCl	TRUE	836.694	-1.16428	0.201635	-5.7742	7.73208e-09	1.19375e-06
AT4G34760	NaCl	TRUE	49.3941	-1.16005	0.260685	-4.44999	8.58727e-06	0.00044455
AT3G45710	NaCl	TRUE	86.3942	-1.15883	0.37584	-3.0833	0.00204717	0.0323504
AT1G33170	NaCl	TRUE	143.929	-1.15505	0.299449	-3.85724	0.000114675	0.00363089
AT4G30140	NaCl	TRUE	426.74	-1.15433	0.26099	-4.4229	9.73859e-06	0.000491039
AT1G65570	NaCl	TRUE	27.7347	-1.15431	0.379046	-3.0453	0.00232447	0.0353554
AT2G26080	NaCl	TRUE	8379.96	1.15221	0.131367	8.77092	1.77213e-18	2.0611e-15
AT3G28130	NaCl	TRUE	296.755	-1.15049	0.179028	-6.42631	1.30735e-10	3.04106e-08
AT1G05100	NaCl	TRUE	522.364	1.15015	0.166949	6.88923	5.6094e-12	1.84644e-09
AT2G03090	NaCl	TRUE	715.06	-1.14856	0.189087	-6.07422	1.24591e-09	2.31236e-07
AT4G18800	NaCl	TRUE	31.4968	-1.1479	0.323965	-3.54327	0.0003952	0.00929817
AT5G16250	NaCl	TRUE	485.155	-1.14602	0.258714	-4.42967	9.43761e-06	0.000480025
AT2G15292	NaCl	TRUE	178.712	-1.14565	0.251077	-4.56295	5.04387e-06	0.000278466
AT1G15830	NaCl	TRUE	86.2337	-1.14488	0.241833	-4.73419	2.19935e-06	0.000140893
AT5G51720	NaCl	TRUE	134.733	1.14351	0.231789	4.93338	8.08176e-07	6.07951e-05
AT5G10380	NaCl	TRUE	75.2039	-1.14273	0.272858	-4.18799	2.81441e-05	0.00121837
AT1G15080	NaCl	TRUE	42.6801	-1.1424	0.265764	-4.29854	1.71926e-05	0.000789321
AT1G08900	NaCl	TRUE	32.382	-1.14171	0.299233	-3.81546	0.000135927	0.00411699
AT5G42590	NaCl	TRUE	87.5446	-1.14026	0.382057	-2.98453	0.00284017	0.0406478
AT3G61490	NaCl	TRUE	236.344	-1.13665	0.358651	-3.16925	0.00152832	0.0260636
AT3G44990	NaCl	TRUE	459.589	-1.13656	0.222759	-5.1022	3.35725e-07	2.82949e-05
AT3G53240	NaCl	TRUE	79.3901	-1.13583	0.204148	-5.56376	2.64018e-08	3.43736e-06
AT4G25790	NaCl	TRUE	34.5301	-1.13411	0.347604	-3.26265	0.00110375	0.0205726
AT2G26860	NaCl	TRUE	35.7271	-1.13386	0.334993	-3.38474	0.000712447	0.0144696
AT1G06360	NaCl	TRUE	352.612	-1.13336	0.329077	-3.44405	0.000573071	0.0122321
AT3G50350	NaCl	TRUE	29.5258	-1.13277	0.350612	-3.23083	0.00123431	0.0222227
AT2G26030	NaCl	TRUE	69.0144	-1.13194	0.249253	-4.54133	5.59008e-06	0.00030572
AT1G53440	NaCl	TRUE	185.787	-1.13019	0.300312	-3.76337	0.000167636	0.00480225
AT4G11050	NaCl	TRUE	44.5275	-1.12996	0.359795	-3.14056	0.00168625	0.0280441
AT2G41150	NaCl	TRUE	84.481	1.12864	0.245168	4.60355	4.15359e-06	0.000237586
AT5G04950	NaCl	TRUE	127.785	-1.12748	0.230371	-4.89418	9.87146e-07	7.06063e-05
AT5G67480	NaCl	TRUE	484.455	1.12436	0.187372	6.00069	1.96483e-09	3.46247e-07
AT1G23935	NaCl	TRUE	33.2898	-1.12372	0.309645	-3.62905	0.000284462	0.00722375
AT3G23430	NaCl	TRUE	572.055	1.12194	0.284824	3.93907	8.17974e-05	0.00281467
AT5G08330	NaCl	TRUE	111.021	-1.12011	0.264546	-4.23409	2.29484e-05	0.00101613
AT2G32340	NaCl	TRUE	46.2191	1.11905	0.268107	4.17389	2.99448e-05	0.00127419
AT2G38250	NaCl	TRUE	55.1312	1.11502	0.227554	4.90002	9.58292e-07	6.93708e-05
AT5G20740	NaCl	TRUE	63.0512	-1.11417	0.256796	-4.33874	1.43305e-05	0.000683085
AT2G31830	NaCl	TRUE	27.8809	-1.11356	0.355774	-3.12997	0.00174826	0.0288096
AT4G37370	NaCl	TRUE	149.615	1.11197	0.359632	3.09198	0.00198825	0.0317647
AT5G24150	NaCl	TRUE	1005.9	1.11103	0.302231	3.67609	0.000236839	0.00627947
AT5G20635	NaCl	TRUE	28.8349	-1.11039	0.308986	-3.59367	0.000326051	0.00799324
AT5G47550	NaCl	TRUE	296.054	1.11012	0.213307	5.20436	1.94669e-07	1.80292e-05
AT1G76110	NaCl	TRUE	91.3852	-1.10931	0.205416	-5.40033	6.65171e-08	7.48683e-06
AT5G65740	NaCl	TRUE	23.3308	-1.10685	0.365571	-3.02772	0.0024641	0.0368685
AT2G02980	NaCl	TRUE	26.8838	-1.10679	0.329346	-3.36057	0.00077783	0.0154205
AT1G59960	NaCl	TRUE	36.37	-1.10572	0.361651	-3.05744	0.00223239	0.0342796
AT1G52000	NaCl	TRUE	1372.02	-1.10232	0.199729	-5.51908	3.40785e-08	4.21655e-06
AT5G19190	NaCl	TRUE	104.972	-1.1003	0.233068	-4.72092	2.34781e-06	0.00014787
AT1G56430	NaCl	TRUE	46.859	-1.09929	0.262745	-4.18386	2.86599e-05	0.00123457
AT3G28770	NaCl	TRUE	49.3722	-1.09919	0.283705	-3.87442	0.00010688	0.00342557
AT4G23290	NaCl	TRUE	151.737	-1.09646	0.191842	-5.71541	1.09439e-08	1.61803e-06
AT1G43910	NaCl	TRUE	57.1621	1.09626	0.365317	3.00085	0.00269226	0.0390759
AT3G06520	NaCl	TRUE	49.4294	1.09265	0.234733	4.65485	3.2421e-06	0.000195715
AT3G02140	NaCl	TRUE	144.888	1.09241	0.162471	6.72369	1.77184e-11	5.15191e-09
AT5G06640	NaCl	TRUE	703.311	-1.09195	0.335721	-3.25254	0.00114379	0.0211167
AT3G46970	NaCl	TRUE	907.578	-1.09127	0.168967	-6.45844	1.05786e-10	2.52815e-08
AT1G71990	NaCl	TRUE	35.9132	-1.09122	0.277584	-3.93112	8.45495e-05	0.00289226
AT4G25280	NaCl	TRUE	137.48	1.09118	0.240522	4.5367	5.71412e-06	0.000309592
AT5G22875	NaCl	TRUE	32.1738	-1.09066	0.359124	-3.03701	0.00238937	0.0361398
AT4G28780	NaCl	TRUE	184.813	-1.08972	0.295256	-3.69077	0.000223576	0.0060286
AT1G74670	NaCl	TRUE	25.177	-1.08911	0.353985	-3.07672	0.00209292	0.032806
AT3G21210	NaCl	TRUE	25.8984	1.08709	0.336353	3.23199	0.0012293	0.0221783
AT1G06490	NaCl	TRUE	216.699	1.08653	0.23712	4.5822	4.60102e-06	0.000257273
AT5G56240	NaCl	TRUE	990.357	1.08407	0.155328	6.97924	2.96775e-12	1.08282e-09
AT1G53035	NaCl	TRUE	26.0437	-1.08362	0.306434	-3.53622	0.000405894	0.00947956
AT3G50750	NaCl	TRUE	48.5348	-1.08337	0.30375	-3.56667	0.000361552	0.00872427
AT4G25220	NaCl	TRUE	48.3612	-1.08244	0.312657	-3.46207	0.000536034	0.0117042
AT5G43745	NaCl	TRUE	777.968	1.08118	0.123394	8.76198	1.91857e-18	2.09196e-15
AT2G38390	NaCl	TRUE	399.04	1.08016	0.339395	3.18261	0.00145953	0.0252108
AT1G71330	NaCl	TRUE	34.508	1.07606	0.297477	3.61727	0.000297729	0.00747363
AT4G16680	NaCl	TRUE	295.051	1.07407	0.175632	6.11544	9.62909e-10	1.88752e-07
AT5G17170	NaCl	TRUE	283.941	1.07335	0.189578	5.66175	1.49835e-08	2.04221e-06
AT2G21100	NaCl	TRUE	40.1654	-1.071	0.361355	-2.96384	0.00303824	0.0428091
AT2G38170	NaCl	TRUE	3639.33	-1.06823	0.242809	-4.39947	1.08514e-05	0.000540896
AT1G50060	NaCl	TRUE	35.149	-1.06731	0.306416	-3.48321	0.000495433	0.0110812
AT1G66950	NaCl	TRUE	22.5648	1.06728	0.36684	2.90938	0.00362147	0.0481923
AT5G37260	NaCl	TRUE	42.5589	1.06529	0.300599	3.5439	0.000394259	0.00929817
AT1G01110	NaCl	TRUE	38.2818	1.06329	0.245522	4.33073	1.48616e-05	0.000704554
AT5G56100	NaCl	TRUE	55.5398	-1.06321	0.305474	-3.48053	0.000500427	0.0111358
AT5G38200	NaCl	TRUE	202.22	1.06197	0.17282	6.14497	7.99797e-10	1.6012e-07
AT1G69480	NaCl	TRUE	560.268	1.06147	0.21528	4.93066	8.19535e-07	6.13631e-05
AT5G54145	NaCl	TRUE	100.367	-1.06121	0.237422	-4.46973	7.83189e-06	0.000410316
AT1G14580	NaCl	TRUE	166.205	-1.06026	0.190324	-5.57082	2.53536e-08	3.3257e-06
AT5G52570	NaCl	TRUE	267.546	1.05949	0.164463	6.44213	1.17811e-10	2.77748e-08
AT2G28950	NaCl	TRUE	366.116	-1.05778	0.14405	-7.34316	2.08605e-13	9.33159e-11
AT3G23920	NaCl	TRUE	5691.37	1.0577	0.118206	8.94788	3.62384e-19	6.32215e-16
AT2G34060	NaCl	TRUE	30.497	-1.0549	0.304347	-3.46612	0.000528022	0.0115582
AT2G46870	NaCl	TRUE	101.674	-1.05476	0.198165	-5.32262	1.02283e-07	1.05588e-05
AT3G51660	NaCl	TRUE	92.7116	-1.05436	0.215735	-4.88732	1.0222e-06	7.22448e-05
AT5G47500	NaCl	TRUE	409.141	-1.0531	0.218694	-4.81542	1.46891e-06	9.89444e-05
AT2G33330	NaCl	TRUE	69.2489	-1.05114	0.227752	-4.61529	3.92554e-06	0.00022528
AT3G54590	NaCl	TRUE	3311.87	-1.05104	0.312446	-3.36389	0.000768515	0.0152879
AT1G54730	NaCl	TRUE	184.338	-1.04859	0.274496	-3.82005	0.000133422	0.00406228
AT3G62550	NaCl	TRUE	161.091	-1.04807	0.354934	-2.95285	0.0031485	0.0437532
AT4G33270	NaCl	TRUE	111.553	-1.04716	0.288621	-3.62815	0.000285459	0.00723854
AT3G06070	NaCl	TRUE	24.1508	-1.04502	0.3312	-3.15525	0.0016036	0.026823
AT5G46105	NaCl	TRUE	24.9212	-1.04439	0.357771	-2.91915	0.00350989	0.0472116
AT5G62720	NaCl	TRUE	230.425	-1.04184	0.263591	-3.95248	7.73465e-05	0.00269339
AT1G31240	NaCl	TRUE	24.761	1.04168	0.30892	3.37201	0.000746225	0.0150114
AT1G78820	NaCl	TRUE	230.732	-1.03862	0.261863	-3.96628	7.30021e-05	0.00257292
AT4G33905	NaCl	TRUE	190.253	1.03836	0.21949	4.73078	2.23664e-06	0.000141892
AT2G08760	NaCl	TRUE	1622.01	1.03647	0.167954	6.1712	6.77754e-10	1.39107e-07
AT3G50740	NaCl	TRUE	95.4586	-1.03364	0.186344	-5.54693	2.90722e-08	3.72936e-06
AT3G13080	NaCl	TRUE	1969.79	1.03216	0.322207	3.2034	0.00135816	0.0238856
AT5G14565	NaCl	TRUE	43.0537	-1.03207	0.297363	-3.47075	0.00051901	0.0114216
AT2G27590	NaCl	TRUE	33.7527	-1.03174	0.320366	-3.2205	0.00127965	0.0228737
AT1G13260	NaCl	TRUE	179.018	-1.03049	0.286995	-3.59062	0.000329894	0.00806069
AT4G10310	NaCl	TRUE	39.6066	1.03017	0.335467	3.07084	0.00213455	0.0331902
AT1G69600	NaCl	TRUE	63.4643	1.02955	0.282669	3.64225	0.000270262	0.00698517
AT5G20630	NaCl	TRUE	347.256	-1.02882	0.33013	-3.1164	0.00183076	0.0299339
AT1G32900	NaCl	TRUE	1475.73	1.0285	0.183579	5.60248	2.11312e-08	2.81417e-06
AT5G43440	NaCl	TRUE	39.6505	-1.02779	0.282939	-3.63256	0.000280623	0.00713841
AT1G14640	NaCl	TRUE	59.1362	1.0263	0.257295	3.98881	6.64065e-05	0.00241811
AT2G23790	NaCl	TRUE	440.542	1.02192	0.125143	8.16605	3.18656e-16	2.31637e-13
AT5G24800	NaCl	TRUE	228.244	1.02143	0.190991	5.34808	8.88909e-08	9.63224e-06
AT4G04570	NaCl	TRUE	125.541	-1.02116	0.256233	-3.98526	6.74054e-05	0.00244473
AT4G25020	NaCl	TRUE	21.999	1.01926	0.323871	3.14711	0.00164894	0.0275023
AT4G33150	NaCl	TRUE	1533.99	1.01824	0.200582	5.07644	3.84566e-07	3.16469e-05
AT5G06790	NaCl	TRUE	27.8242	-1.01537	0.337768	-3.00612	0.00264607	0.0387601
AT4G09950	NaCl	TRUE	25.8336	1.01407	0.293875	3.45068	0.000559173	0.0120139
AT3G14570	NaCl	TRUE	570.104	1.01319	0.147289	6.87892	6.0306e-12	1.91291e-09
AT1G69310	NaCl	TRUE	349.979	1.00963	0.141816	7.11934	1.08445e-12	4.39983e-10
AT2G37750	NaCl	TRUE	45.0232	-1.00928	0.277287	-3.63984	0.000272806	0.00702484
AT3G14740	NaCl	TRUE	26.7981	-1.00857	0.313303	-3.21916	0.00128566	0.0229108
AT5G44550	NaCl	TRUE	94.8358	-1.00774	0.298727	-3.37346	0.000742311	0.0149888
AT3G44970	NaCl	TRUE	206.247	-1.0075	0.2015	-4.99999	5.73334e-07	4.48537e-05
AT1G55990	NaCl	TRUE	356.474	-1.00734	0.317648	-3.17125	0.00151785	0.025919
AT3G23080	NaCl	TRUE	201.757	-1.00697	0.181948	-5.53437	3.12343e-08	3.94865e-06
AT3G56620	NaCl	TRUE	66.7023	1.00629	0.337017	2.98589	0.00282757	0.0405339
AT5G19520	NaCl	TRUE	235.624	1.00546	0.20373	4.93525	8.00492e-07	6.0719e-05
AT5G05500	NaCl	TRUE	115.702	-1.00462	0.332311	-3.02314	0.00250165	0.0371753
AT3G58720	NaCl	TRUE	25.0927	1.00086	0.316748	3.15979	0.00157884	0.0265361

## Sheet: ctrl_DEGs_cdc73VSCol0
geneID	condition	.abundant	baseMean	log2FoldChange	lfcSE	stat	pvalue	padj
AT3G06345	ctrl	TRUE	1005.08	-6.08994	0.314603	-19.3575	1.76062e-83	3.07071e-79
AT3G41762	ctrl	TRUE	449.406	-3.78502	0.250574	-15.1054	1.49152e-51	1.30068e-47
AT2G46880	ctrl	TRUE	76.7265	1.97889	0.273993	7.22243	5.10658e-13	2.96879e-09
AT4G35770	ctrl	TRUE	62.0722	1.96182	0.368162	5.32867	9.89333e-08	0.000142876
AT2G11810	ctrl	TRUE	83.2404	1.93476	0.374834	5.16165	2.44787e-07	0.000266834
AT3G21720	ctrl	TRUE	73.5228	1.8575	0.331171	5.60889	2.03625e-08	3.94603e-05
AT1G17710	ctrl	TRUE	41.6622	1.79647	0.321646	5.58523	2.33396e-08	4.07066e-05
AT4G15210	ctrl	TRUE	233.071	1.6481	0.368496	4.4725	7.73089e-06	0.00478851
AT4G12470	ctrl	TRUE	268.83	1.5021	0.33317	4.50852	6.528e-06	0.00455419
AT2G15880	ctrl	TRUE	108.968	1.44772	0.312385	4.63441	3.57963e-06	0.00334026
AT3G22590	ctrl	TRUE	74.3787	-1.39965	0.206561	-6.77597	1.23573e-11	5.38809e-08
AT2G35810	ctrl	TRUE	39.8033	-1.3926	0.247289	-5.63146	1.78693e-08	3.89574e-05
AT2G16586	ctrl	TRUE	521.596	1.31775	0.207224	6.35906	2.02989e-10	5.90056e-07
AT3G43110	ctrl	TRUE	57.472	1.25743	0.333109	3.77483	0.000160115	0.0457797
AT1G66540	ctrl	TRUE	40.2602	-1.25717	0.272691	-4.61025	4.02187e-06	0.00334026
AT3G49110	ctrl	TRUE	53.0871	1.19435	0.288245	4.14354	3.41992e-05	0.0152941
AT5G62360	ctrl	TRUE	107.318	1.1677	0.274971	4.24661	2.17027e-05	0.0108148
AT1G21250	ctrl	TRUE	34.7264	1.11372	0.282877	3.93713	8.24621e-05	0.0293515
AT3G29590	ctrl	TRUE	105.309	-1.07429	0.244688	-4.39046	1.13113e-05	0.00636387
AT1G72520	ctrl	TRUE	97.0966	1.06976	0.282945	3.78082	0.00015631	0.0457797
AT3G15990	ctrl	TRUE	107.157	1.03164	0.239183	4.31318	1.60924e-05	0.00825491

## Sheet: salt_DEGs_cdc73-2VSCol0
geneID	condition	.abundant	baseMean	log2FoldChange	lfcSE	stat	pvalue	padj
AT3G06345	NaCl	TRUE	1070.02	-6.24991	0.192472	-32.4718	2.66893e-231	4.56574e-227
AT3G41762	NaCl	TRUE	407.4	-3.52782	0.266757	-13.2249	6.30511e-40	5.39308e-36
AT3G06355	NaCl	TRUE	343.165	-2.25359	0.298308	-7.55458	4.202e-14	1.43767e-10
AT3G21720	NaCl	TRUE	76.0293	1.76585	0.200949	8.78756	1.52844e-18	8.71569e-15
AT1G50060	NaCl	TRUE	29.1913	-1.37201	0.337944	-4.05988	4.90969e-05	0.033596
AT3G22590	NaCl	TRUE	74.4171	-1.23782	0.225866	-5.48031	4.2457e-08	8.07013e-05
AT2G16586	NaCl	TRUE	518.817	1.16492	0.195565	5.9567	2.57381e-09	5.50376e-06
AT5G11330	NaCl	TRUE	105.594	-1.12771	0.16941	-6.65665	2.80137e-11	7.98718e-08
AT4G35480	NaCl	TRUE	28.3928	1.12122	0.279124	4.01691	5.89652e-05	0.0360256
AT3G04165	NaCl	TRUE	346.41	1.11064	0.261253	4.2512	2.12625e-05	0.0191441
AT3G29130	NaCl	TRUE	46.8849	-1.03349	0.240649	-4.29462	1.74995e-05	0.0166313
AT2G01008	NaCl	TRUE	5014.72	1.01755	0.221881	4.58603	4.51762e-06	0.00552021
